# Supplementary material for: Computational investigation on the mechanism and stereochemistry of guanidine-catalyzed enantioselective isomerization of 3-alkynoates to allenoates
Source: Royal Society of Chemistry journal article supplement (doi:10.1039/c0ob01233e), 2011-01-01
Supplement: c0ob01233e.pdf [file c0ob01233e.pdf]

## Supporting Information

# Computational investigation on the mechanism and stereochemistry of guanidine-catalyzed enantioselective isomerization of 3-alkynoates to allenates

Dongfeng Huang, Song Qin, Changwei Hu

*Key Laboratory of Green Chemistry and Technology, Ministry of Education, College of Chemistry, Sichuan University, Chengdu, Sichuan, 610064, China.*

### CONTENTS:

#### Part I: Model system

|                                                                                                                                               |     |
|-----------------------------------------------------------------------------------------------------------------------------------------------|-----|
| S1: Energies of all optimized stationary points in model reaction system. (a.u.).....                                                         | S2  |
| S2. Cartesian coordinates and energies of all optimized stationary points in model reaction system.....                                       | S3  |
| S3: Comparison of the energies of all optimized stationary points along cis-path at the B3LTP/6-31+G(d,p) and B3LYP/6-311++G(d,p) levels..... | S21 |
| S4. Preliminary results and discussion of model system.....                                                                                   | S22 |

#### Part II: Actual system

|                                                                                                                               |     |
|-------------------------------------------------------------------------------------------------------------------------------|-----|
| S5: Energies of all species over the actual reaction system.....                                                              | S21 |
| S6. Cartesian coordinates and energies of all optimized structures in actual reaction system. ....                            | S25 |
| S7: Energies of <i>anti-cis</i> - and <i>syn-cis</i> -TS2 with different R <sub>1</sub> group. ....                           | S60 |
| S8: Cartesian coordinates and energies of <i>anti-cis</i> - and <i>syn-cis</i> -TS2 with different R <sub>1</sub> group. .... | S61 |
| S9: Reference 14 details.....                                                                                                 | S70 |

## Part I: Model system

*S1: Summarize energies of all optimized stationary points over model reaction system. (a.u.)*

| Species            | B3LYP/6-31+G(d,p) |                  |          |                    |             |       |
|--------------------|-------------------|------------------|----------|--------------------|-------------|-------|
|                    | ZPE               | $E_{\text{ZPE}}$ | $G_c^a$  | $E_{\text{PCM}}^b$ | $G^c$       |       |
| Reactant           | 0.181252          | -575.434572      | 0.139312 | -575.628546        | -575.489234 |       |
| Cat.               | 0.147311          | -360.058238      | 0.117003 | -360.216473        | -360.099470 |       |
| <i>cis</i> -COM    | 0.329802          | -935.503328      | 0.273605 | -935.853084        | -935.579479 | 0.0   |
| <i>cis</i> -TS1    | 0.325445          | -935.486876      | 0.273901 | -935.833160        | -935.559259 | 53.1  |
| <i>cis</i> -IM1    | 0.329353          | -935.490612      | 0.277327 | -935.841760        | -935.564433 | 39.5  |
| <i>cis</i> -TSR    | 0.328403          | -935.489907      | 0.276956 | -935.840637        | -935.563681 | 41.5  |
| <i>cis</i> -IM2    | 0.328489          | -935.491882      | 0.275394 | -935.843446        | -935.568052 | 30.0  |
| <i>cis</i> -TS2    | 0.325110          | -935.489572      | 0.273455 | -935.836559        | -935.563104 | 43.0  |
| <i>cis</i> -IM3    | 0.329371          | -935.511965      | 0.274559 | -935.861149        | -935.586590 | -18.7 |
| Product            | 0.180937          | -575.442305      | 0.140377 | -575.635898        | -575.495521 |       |
| <i>trans</i> -COM  | 0.329851          | -935.503649      | 0.274345 | -935.853780        | -935.579435 | 0.1   |
| <i>trans</i> -TS1  | 0.325265          | -935.485686      | 0.272891 | -935.833183        | -935.560292 | 50.3  |
| <i>trans</i> -IM1  | 0.328458          | -935.486706      | 0.275195 | -935.839419        | -935.564224 | 40.0  |
| <i>trans</i> -TSR  | 0.329012          | -935.477560      | 0.277008 | -935.831639        | -935.554631 | 65.2  |
| <i>trans</i> -IM2  | 0.328482          | -935.479252      | 0.274491 | -935.832846        | -935.558355 | 55.4  |
| <i>trans</i> -TS2  | 0.324708          | -935.479332      | 0.271294 | -935.827758        | -935.556464 | 60.4  |
| <i>trans</i> -IM3  | 0.329167          | -935.506791      | 0.273075 | -935.856734        | -935.583659 | -11.0 |
| <i>cis</i> -COM'   | 0.329329          | -935.498739      | 0.272869 | -935.849239        | -935.576370 | 8.2   |
| <i>cis</i> -TS1'   | 0.325176          | -935.477004      | 0.272431 | -935.826861        | -935.554430 | 65.7  |
| <i>cis</i> -IM1'   | 0.328871          | -935.475346      | 0.274743 | -935.830545        | -935.555802 | 62.1  |
| <i>trans</i> -COM' | 0.329686          | -935.500043      | 0.274042 | -935.850481        | -935.576439 | 8.0   |
| <i>trans</i> -TS1' | 0.325176          | -935.477004      | 0.272431 | -935.827575        | -935.555144 | 63.9  |
| <i>trans</i> -IM1' | 0.328871          | -935.475346      | 0.274743 | -935.832601        | -935.557858 | 56.7  |

a: Thermal correction to Gibbs Free Energy

b: total electronic energies in solvent.

c:  $G = E_{\text{PCM}} + G_c$ .

*S2. Cartesian coordinates and energies of all optimized stationary points of model reaction system.*

Catalyst

Standard orientation:

| Center Number | Atomic Number | Atomic Type | Coordinates (Angstroms) |           |           |
|---------------|---------------|-------------|-------------------------|-----------|-----------|
|               |               |             | X                       | Y         | Z         |
| 1             | 6             | 0           | 2.174651                | -0.185097 | -0.090443 |
| 2             | 7             | 0           | 0.035733                | 0.663801  | -0.293356 |
| 3             | 6             | 0           | 0.059912                | -0.710168 | -0.017053 |
| 4             | 7             | 0           | 1.201329                | -1.284810 | 0.103390  |
| 5             | 6             | 0           | -2.156284               | -0.049280 | -0.130720 |
| 6             | 7             | 0           | -1.233321               | -1.152916 | 0.165101  |
| 7             | 1             | 0           | -1.463511               | -2.106448 | -0.074725 |
| 8             | 1             | 0           | -2.493253               | -0.058633 | -1.177512 |
| 9             | 1             | 0           | 3.001679                | -0.271595 | 0.620459  |
| 10            | 1             | 0           | -3.031740               | -0.076037 | 0.524011  |
| 11            | 1             | 0           | 2.599305                | -0.230409 | -1.103853 |
| 12            | 6             | 0           | -1.257376               | 1.182835  | 0.134558  |
| 13            | 6             | 0           | 1.363478                | 1.134889  | 0.101887  |
| 14            | 1             | 0           | -1.568167               | 2.058085  | -0.442447 |
| 15            | 1             | 0           | -1.258144               | 1.443529  | 1.207503  |
| 16            | 1             | 0           | 1.713614                | 1.959240  | -0.525578 |
| 17            | 1             | 0           | 1.367738                | 1.460666  | 1.156827  |

Reactant

Standard orientation:

| Center Number | Atomic Number | Atomic Type | Coordinates (Angstroms) |           |           |
|---------------|---------------|-------------|-------------------------|-----------|-----------|
|               |               |             | X                       | Y         | Z         |
| 1             | 6             | 0           | 2.976985                | 0.021719  | 0.000654  |
| 2             | 8             | 0           | 4.256572                | -0.415507 | -0.001832 |
| 3             | 8             | 0           | 2.661655                | 1.189435  | 0.000654  |
| 4             | 6             | 0           | 2.031342                | -1.178895 | 0.003897  |
| 5             | 6             | 0           | -1.952767               | -0.208082 | 0.001160  |
| 6             | 6             | 0           | -0.565250               | -0.557550 | 0.002913  |
| 7             | 6             | 0           | 0.617002                | -0.827681 | 0.002990  |
| 8             | 1             | 0           | 2.283324                | -1.797514 | -0.867754 |
| 9             | 1             | 0           | 2.283377                | -1.792185 | 0.879375  |
| 10            | 6             | 0           | 5.271564                | 0.608343  | -0.004173 |
| 11            | 6             | 0           | -2.947646               | -1.206172 | -0.001993 |
| 12            | 6             | 0           | -4.297667               | -0.855488 | -0.003751 |
| 13            | 6             | 0           | -4.676822               | 0.490821  | -0.002335 |
| 14            | 6             | 0           | -3.695649               | 1.487946  | 0.000908  |
| 15            | 6             | 0           | -2.343540               | 1.146352  | 0.002700  |
| 16            | 1             | 0           | -2.651205               | -2.250517 | -0.003074 |
| 17            | 1             | 0           | -5.054866               | -1.634482 | -0.006227 |
| 18            | 1             | 0           | -5.728922               | 0.760992  | -0.003710 |
| 19            | 1             | 0           | -3.984162               | 2.535300  | 0.002054  |
| 20            | 1             | 0           | -1.579064               | 1.916759  | 0.005191  |
| 21            | 1             | 0           | 5.177847                | 1.234011  | -0.895079 |
| 22            | 1             | 0           | 5.181441                | 1.234520  | 0.886754  |
| 23            | 1             | 0           | 6.221105                | 0.073812  | -0.005933 |

## Product

Standard orientation:

| Center<br>Number | Atomic<br>Number | Atomic<br>Type | Coordinates (Angstroms) |           |           |
|------------------|------------------|----------------|-------------------------|-----------|-----------|
|                  |                  |                | X                       | Y         | Z         |
| 1                | 6                | 0              | 2.780259                | -0.089546 | 0.102031  |
| 2                | 8                | 0              | 3.933416                | 0.226744  | -0.538592 |
| 3                | 8                | 0              | 2.627813                | 0.019320  | 1.302502  |
| 4                | 6                | 0              | 1.772459                | -0.575116 | -0.879590 |
| 5                | 6                | 0              | -1.850626               | -0.503977 | -0.072875 |
| 6                | 6                | 0              | -0.636743               | -1.338404 | -0.164198 |
| 7                | 6                | 0              | 0.564628                | -0.947359 | -0.518289 |
| 8                | 1                | 0              | 2.083250                | -0.611556 | -1.922216 |
| 9                | 6                | 0              | 4.999075                | 0.709200  | 0.299783  |
| 10               | 6                | 0              | -1.837236               | 0.876085  | -0.346382 |
| 11               | 6                | 0              | -3.006908               | 1.626961  | -0.250779 |
| 12               | 6                | 0              | -4.211756               | 1.017186  | 0.120732  |
| 13               | 6                | 0              | -4.235491               | -0.351989 | 0.396643  |
| 14               | 6                | 0              | -3.063974               | -1.106069 | 0.300546  |
| 15               | 1                | 0              | -0.905157               | 1.356719  | -0.629330 |
| 16               | 1                | 0              | -2.980151               | 2.691944  | -0.463658 |
| 17               | 1                | 0              | -5.121371               | 1.605981  | 0.195496  |
| 18               | 1                | 0              | -5.164298               | -0.834521 | 0.687416  |
| 19               | 1                | 0              | -3.086979               | -2.171061 | 0.517596  |
| 20               | 1                | 0              | -0.755327               | -2.391574 | 0.095365  |
| 21               | 1                | 0              | 5.269395                | -0.044469 | 1.043670  |
| 22               | 1                | 0              | 4.695417                | 1.625219  | 0.812931  |
| 23               | 1                | 0              | 5.833258                | 0.902983  | -0.374277 |

## *cis*-COM

Standard orientation:

| Center<br>Number | Atomic<br>Number | Atomic<br>Type | Coordinates (Angstroms) |           |           |
|------------------|------------------|----------------|-------------------------|-----------|-----------|
|                  |                  |                | X                       | Y         | Z         |
| 1                | 6                | 0              | 0.755988                | 2.543540  | 0.010556  |
| 2                | 8                | 0              | 1.212264                | 3.758735  | -0.337755 |
| 3                | 8                | 0              | 0.875169                | 2.085212  | 1.133604  |
| 4                | 6                | 0              | 0.141003                | 1.818410  | -1.175575 |
| 5                | 6                | 0              | -3.398134               | -0.070010 | -0.307877 |
| 6                | 6                | 0              | -2.164760               | 0.591154  | -0.605044 |
| 7                | 6                | 0              | -1.116130               | 1.149236  | -0.853113 |
| 8                | 1                | 0              | 0.012435                | 2.523015  | -2.003158 |
| 9                | 1                | 0              | 0.900605                | 1.072246  | -1.478583 |
| 10               | 6                | 0              | 1.902197                | 4.498610  | 0.690530  |
| 11               | 6                | 0              | -4.070043               | -0.815642 | -1.297811 |
| 12               | 6                | 0              | -5.272775               | -1.457847 | -1.003788 |
| 13               | 6                | 0              | -5.825826               | -1.369906 | 0.278006  |
| 14               | 6                | 0              | -5.166096               | -0.633008 | 1.267193  |
| 15               | 6                | 0              | -3.963582               | 0.013082  | 0.980945  |
| 16               | 1                | 0              | -3.639023               | -0.884085 | -2.291744 |
| 17               | 1                | 0              | -5.779209               | -2.028679 | -1.777155 |
| 18               | 1                | 0              | -6.762643               | -1.871119 | 0.504060  |
| 19               | 1                | 0              | -5.589938               | -0.560191 | 2.264957  |
| 20               | 1                | 0              | -3.450525               | 0.586010  | 1.747006  |
| 21               | 1                | 0              | 1.236104                | 4.681737  | 1.536859  |
| 22               | 1                | 0              | 2.778671                | 3.942902  | 1.031988  |
| 23               | 1                | 0              | 2.197687                | 5.436243  | 0.220819  |
| 24               | 6                | 0              | 3.557870                | -1.202515 | -1.922661 |

|    |   |   |          |           |           |
|----|---|---|----------|-----------|-----------|
| 25 | 7 | 0 | 3.404021 | -2.069931 | 0.212885  |
| 26 | 6 | 0 | 2.555404 | -0.973585 | 0.010942  |
| 27 | 7 | 0 | 2.576498 | -0.407440 | -1.149979 |
| 28 | 6 | 0 | 2.190763 | -1.739921 | 2.157959  |
| 29 | 7 | 0 | 1.785729 | -0.786057 | 1.122733  |
| 30 | 1 | 0 | 1.374555 | 0.120773  | 1.325366  |
| 31 | 1 | 0 | 2.916789 | -1.303329 | 2.859602  |
| 32 | 1 | 0 | 3.205885 | -1.367148 | -2.945767 |
| 33 | 1 | 0 | 1.329343 | -2.103542 | 2.725211  |
| 34 | 1 | 0 | 4.518631 | -0.669752 | -1.982586 |
| 35 | 6 | 0 | 2.853546 | -2.855756 | 1.312554  |
| 36 | 6 | 0 | 3.725741 | -2.537810 | -1.134930 |
| 37 | 1 | 0 | 3.626422 | -3.397813 | 1.864299  |
| 38 | 1 | 0 | 2.097838 | -3.576698 | 0.954760  |
| 39 | 1 | 0 | 4.733259 | -2.958619 | -1.197562 |
| 40 | 1 | 0 | 2.998908 | -3.297733 | -1.471954 |

*cis*-TS1

Standard orientation:

| Center<br>Number | Atomic<br>Number | Atomic<br>Type | Coordinates (Angstroms) |           |           |
|------------------|------------------|----------------|-------------------------|-----------|-----------|
|                  |                  |                | X                       | Y         | Z         |
| 1                | 6                | 0              | -2.268201               | -1.906755 | -0.000077 |
| 2                | 8                | 0              | -3.362175               | -2.578266 | -0.450123 |
| 3                | 8                | 0              | -2.165379               | -1.595297 | 1.195757  |
| 4                | 6                | 0              | -1.364404               | -1.525595 | -1.075928 |
| 5                | 6                | 0              | 2.595926                | -1.022608 | -0.270819 |
| 6                | 6                | 0              | 1.213066                | -1.215532 | -0.555646 |
| 7                | 6                | 0              | 0.027776                | -1.409709 | -0.777811 |
| 8                | 1                | 0              | -1.598604               | -1.998939 | -2.030121 |
| 9                | 6                | 0              | -4.382349               | -2.853364 | 0.521294  |
| 10               | 6                | 0              | 3.071092                | -1.049021 | 1.060285  |
| 11               | 6                | 0              | 4.423809                | -0.855074 | 1.337952  |
| 12               | 6                | 0              | 5.338025                | -0.634251 | 0.301639  |
| 13               | 6                | 0              | 4.881621                | -0.611403 | -1.020950 |
| 14               | 6                | 0              | 3.530022                | -0.800575 | -1.307735 |
| 15               | 1                | 0              | 2.366767                | -1.235148 | 1.865519  |
| 16               | 1                | 0              | 4.767747                | -0.883980 | 2.368648  |
| 17               | 1                | 0              | 6.391658                | -0.487865 | 0.521192  |
| 18               | 1                | 0              | 5.582919                | -0.446894 | -1.834852 |
| 19               | 1                | 0              | 3.181120                | -0.785314 | -2.335900 |
| 20               | 1                | 0              | -3.989551               | -3.475024 | 1.330090  |
| 21               | 1                | 0              | -4.775987               | -1.925090 | 0.945255  |
| 22               | 1                | 0              | -5.164089               | -3.384591 | -0.023036 |
| 23               | 1                | 0              | -1.733140               | -0.106304 | -1.183892 |
| 24               | 6                | 0              | -0.650920               | 3.182034  | -1.324786 |
| 25               | 6                | 0              | -1.574701               | 2.164275  | -2.057933 |
| 26               | 7                | 0              | -1.012632               | 2.928023  | 0.077060  |
| 27               | 6                | 0              | -1.480485               | 1.629063  | 0.112000  |
| 28               | 7                | 0              | -1.870587               | 1.132738  | -1.040856 |
| 29               | 6                | 0              | -0.126468               | 3.095227  | 1.237188  |
| 30               | 6                | 0              | -0.701379               | 2.042427  | 2.226924  |
| 31               | 7                | 0              | -1.375371               | 1.095687  | 1.330169  |
| 32               | 1                | 0              | -0.845219               | 4.217795  | -1.613647 |
| 33               | 1                | 0              | 0.413838                | 2.956711  | -1.492594 |
| 34               | 1                | 0              | -0.166196               | 4.110782  | 1.637951  |
| 35               | 1                | 0              | 0.913619                | 2.857957  | 0.964339  |
| 36               | 1                | 0              | -1.578975               | 0.102449  | 1.509644  |
| 37               | 1                | 0              | -1.090084               | 1.714885  | -2.929264 |

|    |   |   |           |          |           |
|----|---|---|-----------|----------|-----------|
| 38 | 1 | 0 | 0.082126  | 1.547283 | 2.805810  |
| 39 | 1 | 0 | -1.417911 | 2.497163 | 2.922075  |
| 40 | 1 | 0 | -2.504043 | 2.642658 | -2.390486 |

---

*cis*-IM1

Standard orientation:

---

| Center<br>Number | Atomic<br>Number | Atomic<br>Type | Coordinates (Angstroms) |           |           |
|------------------|------------------|----------------|-------------------------|-----------|-----------|
|                  |                  |                | X                       | Y         | Z         |
| 1                | 6                | 0              | 2.947956                | -1.259850 | -0.027356 |
| 2                | 8                | 0              | 4.208725                | -1.627263 | 0.366503  |
| 3                | 8                | 0              | 2.808533                | -0.654066 | -1.127106 |
| 4                | 6                | 0              | 1.949999                | -1.597087 | 0.916220  |
| 5                | 6                | 0              | -2.011466               | -1.424080 | 0.111651  |
| 6                | 6                | 0              | -0.624189               | -1.504119 | 0.391712  |
| 7                | 6                | 0              | 0.582837                | -1.572063 | 0.613498  |
| 8                | 1                | 0              | 2.277933                | -2.111493 | 1.814784  |
| 9                | 6                | 0              | 5.283114                | -1.246222 | -0.496523 |
| 10               | 6                | 0              | -2.979056               | -1.557833 | 1.139438  |
| 11               | 6                | 0              | -4.341209               | -1.464791 | 0.858976  |
| 12               | 6                | 0              | -4.789180               | -1.230070 | -0.446899 |
| 13               | 6                | 0              | -3.847500               | -1.101393 | -1.475154 |
| 14               | 6                | 0              | -2.482767               | -1.199025 | -1.207201 |
| 15               | 1                | 0              | -2.642075               | -1.746289 | 2.154609  |
| 16               | 1                | 0              | -5.060334               | -1.578753 | 1.666298  |
| 17               | 1                | 0              | -5.851625               | -1.160984 | -0.660870 |
| 18               | 1                | 0              | -4.180295               | -0.938106 | -2.497358 |
| 19               | 1                | 0              | -1.760388               | -1.130209 | -2.015548 |
| 20               | 6                | 0              | -0.958715               | 2.504029  | -1.244046 |
| 21               | 6                | 0              | 0.201743                | 1.922625  | -2.104245 |
| 22               | 7                | 0              | -0.315883               | 2.629124  | 0.075908  |
| 23               | 6                | 0              | 0.723789                | 1.741222  | 0.092075  |
| 24               | 7                | 0              | 1.098071                | 1.328492  | -1.098228 |
| 25               | 6                | 0              | -0.988457               | 2.531534  | 1.381715  |
| 26               | 6                | 0              | 0.156260                | 1.988655  | 2.288051  |
| 27               | 7                | 0              | 1.127650                | 1.427609  | 1.325455  |
| 28               | 1                | 0              | -1.804574               | 1.804869  | -1.187045 |
| 29               | 1                | 0              | -1.310934               | 3.469563  | -1.613281 |
| 30               | 1                | 0              | -1.828242               | 1.824996  | 1.325052  |
| 31               | 1                | 0              | -1.357883               | 3.503322  | 1.716489  |
| 32               | 1                | 0              | 1.774113                | 0.510381  | -1.225980 |
| 33               | 1                | 0              | 0.724385                | 2.708356  | -2.661869 |
| 34               | 1                | 0              | -0.193931               | 1.212444  | 2.971900  |
| 35               | 1                | 0              | 1.589826                | 0.517945  | 1.472751  |
| 36               | 1                | 0              | 5.338929                | -0.158112 | -0.603785 |
| 37               | 1                | 0              | 5.168610                | -1.691607 | -1.488931 |
| 38               | 1                | 0              | 6.187599                | -1.623231 | -0.015731 |
| 39               | 1                | 0              | -0.142048               | 1.162405  | -2.809198 |
| 40               | 1                | 0              | 0.625041                | 2.789363  | 2.869117  |

---

*cis*-TSR

Standard orientation:

---

| Center<br>Number | Atomic<br>Number | Atomic<br>Type | Coordinates (Angstroms) |           |           |
|------------------|------------------|----------------|-------------------------|-----------|-----------|
|                  |                  |                | X                       | Y         | Z         |
| 1                | 6                | 0              | 3.086687                | -1.243983 | -0.077352 |
| 2                | 8                | 0              | 4.355699                | -1.644906 | 0.253650  |

---

|    |   |   |           |           |           |
|----|---|---|-----------|-----------|-----------|
| 3  | 8 | 0 | 2.955863  | -0.281593 | -0.893537 |
| 4  | 6 | 0 | 2.082628  | -1.983657 | 0.572299  |
| 5  | 6 | 0 | -1.861247 | -1.609565 | -0.215211 |
| 6  | 6 | 0 | -0.479738 | -1.776627 | 0.037919  |
| 7  | 6 | 0 | 0.727007  | -1.874574 | 0.263240  |
| 8  | 1 | 0 | 2.404695  | -2.748879 | 1.271261  |
| 9  | 6 | 0 | -2.842761 | -2.228770 | 0.602104  |
| 10 | 6 | 0 | -4.201533 | -2.044143 | 0.355718  |
| 11 | 6 | 0 | -4.636223 | -1.239177 | -0.705426 |
| 12 | 6 | 0 | -3.681580 | -0.627292 | -1.527266 |
| 13 | 6 | 0 | -2.318952 | -0.806908 | -1.293256 |
| 14 | 1 | 0 | -2.517084 | -2.860106 | 1.423611  |
| 15 | 1 | 0 | -4.929919 | -2.536222 | 0.995490  |
| 16 | 1 | 0 | -5.696645 | -1.102971 | -0.895802 |
| 17 | 1 | 0 | -4.002728 | -0.016972 | -2.368232 |
| 18 | 1 | 0 | -1.584971 | -0.354004 | -1.953788 |
| 19 | 6 | 0 | -0.562739 | 3.120489  | -0.994404 |
| 20 | 6 | 0 | 0.784522  | 2.595019  | -1.566911 |
| 21 | 7 | 0 | -0.446089 | 2.734599  | 0.420238  |
| 22 | 6 | 0 | 0.427756  | 1.679728  | 0.466438  |
| 23 | 7 | 0 | 1.156230  | 1.535045  | -0.614133 |
| 24 | 6 | 0 | -1.554624 | 2.421709  | 1.335989  |
| 25 | 6 | 0 | -0.869588 | 1.447012  | 2.338181  |
| 26 | 7 | 0 | 0.319462  | 0.977693  | 1.597535  |
| 27 | 1 | 0 | -1.422782 | 2.613221  | -1.456061 |
| 28 | 1 | 0 | -0.678494 | 4.200059  | -1.111501 |
| 29 | 1 | 0 | -2.372400 | 1.927810  | 0.792253  |
| 30 | 1 | 0 | -1.937102 | 3.319791  | 1.825683  |
| 31 | 1 | 0 | 1.891662  | 0.745328  | -0.764571 |
| 32 | 1 | 0 | 1.549052  | 3.381103  | -1.579142 |
| 33 | 1 | 0 | -1.515152 | 0.606159  | 2.600206  |
| 34 | 1 | 0 | 0.644631  | 0.013288  | 1.625505  |
| 35 | 6 | 0 | 5.432698  | -0.906847 | -0.325494 |
| 36 | 1 | 0 | 6.342063  | -1.374040 | 0.057211  |
| 37 | 1 | 0 | 5.410174  | -0.964530 | -1.417836 |
| 38 | 1 | 0 | 5.397823  | 0.146526  | -0.028445 |
| 39 | 1 | 0 | 0.685263  | 2.189672  | -2.576244 |
| 40 | 1 | 0 | -0.561663 | 1.960904  | 3.254608  |

*cis*-IM2

Standard orientation:

| Center<br>Number | Atomic<br>Number | Atomic<br>Type | Coordinates (Angstroms) |           |           |
|------------------|------------------|----------------|-------------------------|-----------|-----------|
|                  |                  |                | X                       | Y         | Z         |
| 1                | 6                | 0              | -2.633011               | -1.950862 | -0.055387 |
| 2                | 8                | 0              | -3.794006               | -2.616055 | -0.361731 |
| 3                | 8                | 0              | -2.690690               | -0.989708 | 0.767905  |
| 4                | 6                | 0              | -1.510704               | -2.455746 | -0.734210 |
| 5                | 6                | 0              | 2.305676                | -1.434606 | 0.091486  |
| 6                | 6                | 0              | 0.961369                | -1.708453 | -0.275851 |
| 7                | 6                | 0              | -0.210308               | -2.053595 | -0.464210 |
| 8                | 1                | 0              | -1.678035               | -3.249217 | -1.455140 |
| 9                | 6                | 0              | -4.988993               | -2.137195 | 0.254100  |
| 10               | 6                | 0              | 3.391473                | -1.911098 | -0.685956 |
| 11               | 6                | 0              | 4.707350                | -1.620050 | -0.331551 |
| 12               | 6                | 0              | 4.990290                | -0.841497 | 0.797972  |
| 13               | 6                | 0              | 3.929169                | -0.364141 | 1.576712  |
| 14               | 6                | 0              | 2.608438                | -0.652938 | 1.235830  |
| 15               | 1                | 0              | 3.182136                | -2.515934 | -1.563195 |
| 16               | 1                | 0              | 5.520318                | -2.005947 | -0.941497 |

|    |   |   |           |           |           |
|----|---|---|-----------|-----------|-----------|
| 17 | 1 | 0 | 6.017802  | -0.619933 | 1.071148  |
| 18 | 1 | 0 | 4.132633  | 0.228244  | 2.465620  |
| 19 | 1 | 0 | 1.792372  | -0.299161 | 1.859317  |
| 20 | 6 | 0 | -1.292552 | 3.669037  | 0.751961  |
| 21 | 6 | 0 | -2.286979 | 2.520882  | 1.073817  |
| 22 | 7 | 0 | -0.599726 | 3.116213  | -0.418530 |
| 23 | 6 | 0 | -0.682118 | 1.748224  | -0.316843 |
| 24 | 7 | 0 | -1.600525 | 1.334456  | 0.531280  |
| 25 | 6 | 0 | 0.753006  | 3.436199  | -0.893245 |
| 26 | 6 | 0 | 1.117220  | 2.139948  | -1.671734 |
| 27 | 7 | 0 | 0.237955  | 1.135904  | -1.050716 |
| 28 | 1 | 0 | -0.584348 | 3.831670  | 1.579616  |
| 29 | 1 | 0 | -1.793014 | 4.611641  | 0.520515  |
| 30 | 1 | 0 | 1.433974  | 3.598859  | -0.043608 |
| 31 | 1 | 0 | 0.759705  | 4.322979  | -1.530345 |
| 32 | 1 | 0 | -1.971647 | 0.321042  | 0.624871  |
| 33 | 1 | 0 | -3.248347 | 2.671545  | 0.567467  |
| 34 | 1 | 0 | 2.166027  | 1.859781  | -1.554052 |
| 35 | 1 | 0 | 0.410497  | 0.119583  | -1.009266 |
| 36 | 1 | 0 | -5.199533 | -1.102498 | -0.037237 |
| 37 | 1 | 0 | -4.921593 | -2.187974 | 1.345048  |
| 38 | 1 | 0 | -5.783532 | -2.794356 | -0.104654 |
| 39 | 1 | 0 | -2.469628 | 2.407109  | 2.144279  |
| 40 | 1 | 0 | 0.891895  | 2.238024  | -2.739853 |

*cis*-TS2

Standard orientation:

| Center<br>Number | Atomic<br>Number | Atomic<br>Type | Coordinates (Angstroms) |           |           |
|------------------|------------------|----------------|-------------------------|-----------|-----------|
|                  |                  |                | X                       | Y         | Z         |
| 1                | 6                | 0              | -1.381959               | 2.727886  | 0.164556  |
| 2                | 8                | 0              | -2.055205               | 3.873088  | 0.468569  |
| 3                | 8                | 0              | -1.716808               | 2.045918  | -0.819834 |
| 4                | 6                | 0              | -0.332338               | 2.444072  | 1.109108  |
| 5                | 6                | 0              | 2.671550                | 0.264100  | 0.137490  |
| 6                | 6                | 0              | 1.327233                | 0.460258  | 0.679548  |
| 7                | 6                | 0              | 0.581567                | 1.473315  | 0.883058  |
| 8                | 1                | 0              | -0.286382               | 3.059332  | 2.003208  |
| 9                | 6                | 0              | -3.145129               | 4.218898  | -0.393696 |
| 10               | 6                | 0              | 3.733043                | 1.133348  | 0.467347  |
| 11               | 6                | 0              | 5.019401                | 0.914820  | -0.026399 |
| 12               | 6                | 0              | 5.281641                | -0.171811 | -0.868511 |
| 13               | 6                | 0              | 4.239907                | -1.041741 | -1.205097 |
| 14               | 6                | 0              | 2.954734                | -0.833199 | -0.700656 |
| 15               | 1                | 0              | 3.535134                | 1.978589  | 1.120065  |
| 16               | 1                | 0              | 5.820135                | 1.598882  | 0.243287  |
| 17               | 1                | 0              | 6.283347                | -0.338545 | -1.254481 |
| 18               | 1                | 0              | 4.428994                | -1.888629 | -1.860030 |
| 19               | 1                | 0              | 2.152312                | -1.516542 | -0.965178 |
| 20               | 6                | 0              | -3.169103               | -2.706926 | -0.886590 |
| 21               | 6                | 0              | -3.234948               | -1.194896 | -1.220609 |
| 22               | 7                | 0              | -2.256011               | -2.689809 | 0.258020  |
| 23               | 6                | 0              | -1.426983               | -1.597712 | 0.109736  |
| 24               | 7                | 0              | -1.916819               | -0.717366 | -0.770537 |
| 25               | 6                | 0              | -1.422196               | -3.778904 | 0.775490  |
| 26               | 6                | 0              | -0.322941               | -2.963899 | 1.514388  |
| 27               | 7                | 0              | -0.302229               | -1.682774 | 0.783385  |
| 28               | 1                | 0              | -2.741378               | -3.282815 | -1.723210 |
| 29               | 1                | 0              | -4.144004               | -3.125739 | -0.627001 |
| 30               | 1                | 0              | -0.997731               | -4.372313 | -0.050521 |



|    |   |   |           |           |           |
|----|---|---|-----------|-----------|-----------|
| 31 | 1 | 0 | -1.981888 | -4.441213 | 1.439869  |
| 32 | 1 | 0 | -1.661999 | 0.288033  | -0.798363 |
| 33 | 1 | 0 | -4.040965 | -0.701200 | -0.662746 |
| 34 | 1 | 0 | 0.655893  | -3.448093 | 1.478587  |
| 35 | 1 | 0 | 0.468090  | -0.764369 | 0.855710  |
| 36 | 1 | 0 | -3.915445 | 3.441793  | -0.380621 |
| 37 | 1 | 0 | -2.799841 | 4.357689  | -1.421942 |
| 38 | 1 | 0 | -3.544018 | 5.153479  | 0.003131  |
| 39 | 1 | 0 | -3.376476 | -1.004149 | -2.286558 |
| 40 | 1 | 0 | -0.593158 | -2.802242 | 2.565854  |

*cis*-IM3

Standard orientation:

| Center<br>Number | Atomic<br>Number | Atomic<br>Type | Coordinates (Angstroms) |           |           |
|------------------|------------------|----------------|-------------------------|-----------|-----------|
|                  |                  |                | X                       | Y         | Z         |
| 1                | 6                | 0              | 3.839191                | -0.988296 | 1.497854  |
| 2                | 6                | 0              | 2.976321                | 0.280397  | 1.694821  |
| 3                | 7                | 0              | 3.553974                | -1.289241 | 0.099759  |
| 4                | 6                | 0              | 2.243164                | -0.869466 | -0.167836 |
| 5                | 7                | 0              | 1.847112                | 0.018811  | 0.795190  |
| 6                | 6                | 0              | 3.673197                | -2.583615 | -0.568408 |
| 7                | 6                | 0              | 2.623163                | -2.386303 | -1.702429 |
| 8                | 7                | 0              | 1.635015                | -1.424628 | -1.163882 |
| 9                | 1                | 0              | 3.500168                | -1.801839 | 2.163148  |
| 10               | 1                | 0              | 4.902615                | -0.806256 | 1.676149  |
| 11               | 1                | 0              | 3.384239                | -3.405736 | 0.110376  |
| 12               | 1                | 0              | 4.686143                | -2.768068 | -0.937248 |
| 13               | 1                | 0              | 1.160374                | 0.744946  | 0.609719  |
| 14               | 1                | 0              | 3.535648                | 1.179204  | 1.397604  |
| 15               | 1                | 0              | 2.138270                | -3.325145 | -1.987849 |
| 16               | 1                | 0              | 2.640360                | 0.402567  | 2.728116  |
| 17               | 1                | 0              | 3.105176                | -1.974148 | -2.601515 |
| 18               | 6                | 0              | -0.422501               | 3.117787  | -0.287251 |
| 19               | 8                | 0              | -0.553146               | 4.448413  | -0.482609 |
| 20               | 8                | 0              | 0.274317                | 2.643955  | 0.599224  |
| 21               | 6                | 0              | -1.208565               | 2.356512  | -1.284641 |
| 22               | 6                | 0              | -2.449181               | -1.017902 | -0.330399 |
| 23               | 6                | 0              | -1.406813               | -0.250524 | -1.038731 |
| 24               | 6                | 0              | -1.346292               | 1.050179  | -1.179662 |
| 25               | 1                | 0              | -1.653125               | 2.922082  | -2.100764 |
| 26               | 6                | 0              | 0.183919                | 5.296163  | 0.417094  |
| 27               | 6                | 0              | -3.629465               | -0.425744 | 0.155100  |
| 28               | 6                | 0              | -4.584749               | -1.193218 | 0.819042  |
| 29               | 6                | 0              | -4.380786               | -2.565594 | 1.009522  |
| 30               | 6                | 0              | -3.212424               | -3.163221 | 0.529391  |
| 31               | 6                | 0              | -2.254327               | -2.396260 | -0.137022 |
| 32               | 1                | 0              | -3.795824               | 0.637547  | 0.005339  |
| 33               | 1                | 0              | -5.492370               | -0.722541 | 1.186880  |
| 34               | 1                | 0              | -5.127923               | -3.161706 | 1.525783  |
| 35               | 1                | 0              | -3.045753               | -4.227224 | 0.672942  |
| 36               | 1                | 0              | -1.341543               | -2.856401 | -0.504803 |
| 37               | 1                | 0              | -0.557936               | -0.815964 | -1.441948 |
| 38               | 1                | 0              | 1.256145                | 5.102924  | 0.329766  |
| 39               | 1                | 0              | -0.130156               | 5.121434  | 1.449092  |
| 40               | 1                | 0              | -0.049689               | 6.315404  | 0.110154  |

*trans*-COM

Standard orientation:

| Center<br>Number | Atomic<br>Number | Atomic<br>Type | Coordinates (Angstroms) |           |           |
|------------------|------------------|----------------|-------------------------|-----------|-----------|
|                  |                  |                | X                       | Y         | Z         |
| 1                | 6                | 0              | -0.299912               | 1.939537  | -0.159684 |
| 2                | 8                | 0              | 0.603911                | 2.554247  | 0.610038  |
| 3                | 8                | 0              | -1.409297               | 2.402417  | -0.383672 |
| 4                | 6                | 0              | 0.157976                | 0.599270  | -0.711332 |
| 5                | 6                | 0              | 4.096402                | -0.445014 | -0.235846 |
| 6                | 6                | 0              | 2.725429                | -0.071929 | -0.403010 |
| 7                | 6                | 0              | 1.563449                | 0.253331  | -0.533313 |
| 8                | 1                | 0              | -0.111542               | 0.595281  | -1.774687 |
| 9                | 1                | 0              | -0.502945               | -0.156031 | -0.244476 |
| 10               | 6                | 0              | 0.201007                | 3.810700  | 1.190927  |
| 11               | 6                | 0              | 4.660002                | -0.542254 | 1.052908  |
| 12               | 6                | 0              | 5.997387                | -0.903893 | 1.213715  |
| 13               | 6                | 0              | 6.794780                | -1.176937 | 0.097324  |
| 14               | 6                | 0              | 6.244664                | -1.084982 | -1.185449 |
| 15               | 6                | 0              | 4.908683                | -0.721712 | -1.354419 |
| 16               | 1                | 0              | 4.038858                | -0.331483 | 1.917781  |
| 17               | 1                | 0              | 6.417985                | -0.974126 | 2.213036  |
| 18               | 1                | 0              | 7.835722                | -1.459583 | 0.225922  |
| 19               | 1                | 0              | 6.857926                | -1.296246 | -2.057068 |
| 20               | 1                | 0              | 4.480815                | -0.648980 | -2.349460 |
| 21               | 1                | 0              | -0.045901               | 4.529505  | 0.406101  |
| 22               | 1                | 0              | -0.667981               | 3.667514  | 1.837534  |
| 23               | 1                | 0              | 1.061489                | 4.147996  | 1.767805  |
| 24               | 6                | 0              | -4.331570               | -2.626725 | 0.604692  |
| 25               | 6                | 0              | -2.847092               | -2.451445 | 1.049994  |
| 26               | 7                | 0              | -4.681364               | -1.227262 | 0.363239  |
| 27               | 6                | 0              | -3.467087               | -0.612145 | 0.036616  |
| 28               | 7                | 0              | -2.379487               | -1.211792 | 0.388278  |
| 29               | 6                | 0              | -5.697866               | -0.708074 | -0.545170 |
| 30               | 6                | 0              | -5.158597               | 0.723976  | -0.783798 |
| 31               | 7                | 0              | -3.709522               | 0.513097  | -0.703673 |
| 32               | 1                | 0              | -4.965548               | -3.086234 | 1.368160  |
| 33               | 1                | 0              | -4.405926               | -3.217215 | -0.325408 |
| 34               | 1                | 0              | -6.696279               | -0.712047 | -0.099326 |
| 35               | 1                | 0              | -5.726402               | -1.279075 | -1.489798 |
| 36               | 1                | 0              | -3.040759               | 1.279711  | -0.692580 |
| 37               | 1                | 0              | -2.224322               | -3.303969 | 0.762556  |
| 38               | 1                | 0              | -5.450914               | 1.122552  | -1.759353 |
| 39               | 1                | 0              | -5.519576               | 1.406832  | -0.000713 |
| 40               | 1                | 0              | -2.784931               | -2.346242 | 2.143209  |

*trans*-TS1

Standard orientation:

| Center<br>Number | Atomic<br>Number | Atomic<br>Type | Coordinates (Angstroms) |           |           |
|------------------|------------------|----------------|-------------------------|-----------|-----------|
|                  |                  |                | X                       | Y         | Z         |
| 1                | 6                | 0              | -0.671766               | 2.042270  | -0.453401 |
| 2                | 8                | 0              | 0.111690                | 2.736613  | 0.407445  |
| 3                | 8                | 0              | -1.825976               | 2.438084  | -0.714411 |
| 4                | 6                | 0              | -0.104210               | 0.799422  | -0.936035 |
| 5                | 6                | 0              | 3.757672                | -0.290816 | -0.259473 |
| 6                | 6                | 0              | 2.410769                | 0.100143  | -0.507268 |
| 7                | 6                | 0              | 1.265364                | 0.468174  | -0.717696 |

|    |   |   |           |           |           |
|----|---|---|-----------|-----------|-----------|
| 8  | 1 | 0 | -0.495538 | 0.538303  | -1.921513 |
| 9  | 6 | 0 | -0.466996 | 3.909002  | 0.995496  |
| 10 | 6 | 0 | 4.508638  | 0.318522  | 0.771492  |
| 11 | 6 | 0 | 5.827408  | -0.063729 | 1.013063  |
| 12 | 6 | 0 | 6.432991  | -1.059699 | 0.238436  |
| 13 | 6 | 0 | 5.700736  | -1.670637 | -0.785636 |
| 14 | 6 | 0 | 4.381214  | -1.294476 | -1.034678 |
| 15 | 1 | 0 | 4.042250  | 1.093399  | 1.372020  |
| 16 | 1 | 0 | 6.386752  | 0.419642  | 1.809944  |
| 17 | 1 | 0 | 7.461091  | -1.354169 | 0.428970  |
| 18 | 1 | 0 | 6.160721  | -2.443862 | -1.395629 |
| 19 | 1 | 0 | 3.817924  | -1.768740 | -1.832746 |
| 20 | 1 | 0 | -0.753627 | 4.629883  | 0.225179  |
| 21 | 1 | 0 | -1.350049 | 3.653627  | 1.588797  |
| 22 | 1 | 0 | 0.312331  | 4.324911  | 1.635422  |
| 23 | 1 | 0 | -0.918888 | -0.175045 | -0.146261 |
| 24 | 6 | 0 | -3.135769 | -2.832553 | 0.679813  |
| 25 | 6 | 0 | -1.721126 | -2.241484 | 0.963082  |
| 26 | 7 | 0 | -3.925865 | -1.600672 | 0.550410  |
| 27 | 6 | 0 | -3.040984 | -0.626845 | 0.139453  |
| 28 | 7 | 0 | -1.777865 | -0.890251 | 0.367000  |
| 29 | 6 | 0 | -5.166976 | -1.402140 | -0.205576 |
| 30 | 6 | 0 | -5.106341 | 0.125790  | -0.480286 |
| 31 | 7 | 0 | -3.659041 | 0.375488  | -0.492670 |
| 32 | 1 | 0 | -3.502243 | -3.468638 | 1.488810  |
| 33 | 1 | 0 | -3.152571 | -3.404900 | -0.261727 |
| 34 | 1 | 0 | -6.048877 | -1.691224 | 0.370467  |
| 35 | 1 | 0 | -5.148909 | -1.975274 | -1.146685 |
| 36 | 1 | 0 | -3.166291 | 1.262235  | -0.694217 |
| 37 | 1 | 0 | -0.921031 | -2.831099 | 0.509270  |
| 38 | 1 | 0 | -5.563761 | 0.396996  | -1.434590 |
| 39 | 1 | 0 | -1.530073 | -2.172184 | 2.040847  |
| 40 | 1 | 0 | -5.599285 | 0.690934  | 0.321479  |

*trans*-IM1

Standard orientation:

| Center<br>Number | Atomic<br>Number | Atomic<br>Type | Coordinates (Angstroms) |           |           |
|------------------|------------------|----------------|-------------------------|-----------|-----------|
|                  |                  |                | X                       | Y         | Z         |
| 1                | 6                | 0              | -0.707590               | 2.086578  | -0.453981 |
| 2                | 8                | 0              | 0.034433                | 2.821436  | 0.424034  |
| 3                | 8                | 0              | -1.919889               | 2.416146  | -0.656496 |
| 4                | 6                | 0              | -0.057302               | 0.980924  | -1.037101 |
| 5                | 6                | 0              | 3.731257                | -0.234136 | -0.274206 |
| 6                | 6                | 0              | 2.405032                | 0.197410  | -0.539481 |
| 7                | 6                | 0              | 1.271527                | 0.597112  | -0.781113 |
| 8                | 1                | 0              | -0.561264               | 0.552681  | -1.900713 |
| 9                | 6                | 0              | -0.627379               | 3.910811  | 1.070879  |
| 10               | 6                | 0              | 4.333710                | -1.265045 | -1.034524 |
| 11               | 6                | 0              | 5.636063                | -1.683439 | -0.765910 |
| 12               | 6                | 0              | 6.377817                | -1.091147 | 0.262958  |
| 13               | 6                | 0              | 5.795502                | -0.068831 | 1.021900  |
| 14               | 6                | 0              | 4.493902                | 0.356270  | 0.762335  |
| 15               | 1                | 0              | 3.766369                | -1.724723 | -1.838438 |
| 16               | 1                | 0              | 6.076859                | -2.475555 | -1.366152 |
| 17               | 1                | 0              | 7.393131                | -1.418434 | 0.467802  |
| 18               | 1                | 0              | 6.361251                | 0.402620  | 1.821661  |
| 19               | 1                | 0              | 4.048376                | 1.151996  | 1.351479  |
| 20               | 1                | 0              | -0.992021               | 4.640089  | 0.341771  |
| 21               | 1                | 0              | -1.473176               | 3.562537  | 1.672737  |

|    |   |   |           |           |           |
|----|---|---|-----------|-----------|-----------|
| 22 | 1 | 0 | 0.128321  | 4.365614  | 1.713842  |
| 23 | 6 | 0 | -3.167660 | -2.916344 | 0.636275  |
| 24 | 6 | 0 | -1.722378 | -2.436055 | 0.960097  |
| 25 | 7 | 0 | -3.876478 | -1.634214 | 0.517279  |
| 26 | 6 | 0 | -2.950495 | -0.696855 | 0.136634  |
| 27 | 7 | 0 | -1.706160 | -1.076979 | 0.393146  |
| 28 | 6 | 0 | -5.102299 | -1.341242 | -0.237714 |
| 29 | 6 | 0 | -4.933253 | 0.183042  | -0.493031 |
| 30 | 7 | 0 | -3.469289 | 0.353347  | -0.468731 |
| 31 | 1 | 0 | -3.589132 | -3.541139 | 1.426352  |
| 32 | 1 | 0 | -3.202911 | -3.468808 | -0.315545 |
| 33 | 1 | 0 | -6.000434 | -1.578006 | 0.336428  |
| 34 | 1 | 0 | -5.119323 | -1.905864 | -1.182999 |
| 35 | 1 | 0 | -2.897725 | 1.260403  | -0.639359 |
| 36 | 1 | 0 | -5.403369 | 0.774451  | 0.302420  |
| 37 | 1 | 0 | -0.957250 | -3.061813 | 0.496221  |
| 38 | 1 | 0 | -5.347157 | 0.496040  | -1.453855 |
| 39 | 1 | 0 | -1.544279 | -2.402897 | 2.040887  |
| 40 | 1 | 0 | -0.897844 | -0.499241 | 0.089201  |

*trans*-TSR

Standard orientation:

| Center Number | Atomic Number | Atomic Type | Coordinates (Angstroms) |           |           |
|---------------|---------------|-------------|-------------------------|-----------|-----------|
|               |               |             | X                       | Y         | Z         |
| 1             | 6             | 0           | -1.580045               | 2.540080  | -0.437909 |
| 2             | 8             | 0           | -1.041720               | 2.858481  | 0.790360  |
| 3             | 8             | 0           | -2.777325               | 2.776800  | -0.681210 |
| 4             | 6             | 0           | -0.682175               | 1.867885  | -1.321523 |
| 5             | 6             | 0           | 2.931815                | 0.368979  | -0.325011 |
| 6             | 6             | 0           | 1.624094                | 0.817583  | -0.657380 |
| 7             | 6             | 0           | 0.573847                | 1.389859  | -0.972643 |
| 8             | 1             | 0           | -1.004757               | 1.806483  | -2.357559 |
| 9             | 6             | 0           | 3.745460                | -0.293598 | -1.277612 |
| 10            | 6             | 0           | 5.018441                | -0.748963 | -0.937989 |
| 11            | 6             | 0           | 5.521921                | -0.567456 | 0.355824  |
| 12            | 6             | 0           | 4.729576                | 0.085889  | 1.307890  |
| 13            | 6             | 0           | 3.455721                | 0.546828  | 0.980064  |
| 14            | 1             | 0           | 3.366641                | -0.432037 | -2.286123 |
| 15            | 1             | 0           | 5.624756                | -1.246053 | -1.691239 |
| 16            | 1             | 0           | 6.515414                | -0.921507 | 0.615073  |
| 17            | 1             | 0           | 5.110325                | 0.244048  | 2.313940  |
| 18            | 1             | 0           | 2.851916                | 1.063188  | 1.720486  |
| 19            | 6             | 0           | -1.414916               | -3.420146 | 0.662711  |
| 20            | 6             | 0           | -0.085561               | -2.617377 | 0.663513  |
| 21            | 7             | 0           | -2.388452               | -2.332478 | 0.512420  |
| 22            | 6             | 0           | -1.762737               | -1.303653 | -0.129349 |
| 23            | 7             | 0           | -0.442665               | -1.419222 | -0.120739 |
| 24            | 6             | 0           | -3.780682               | -2.369095 | 0.047811  |
| 25            | 6             | 0           | -3.990133               | -0.883430 | -0.353995 |
| 26            | 7             | 0           | -2.618692               | -0.464402 | -0.696917 |
| 27            | 1             | 0           | -1.570624               | -3.979072 | 1.587476  |
| 28            | 1             | 0           | -1.468064               | -4.112416 | -0.191390 |
| 29            | 1             | 0           | -4.462361               | -2.693976 | 0.836334  |
| 30            | 1             | 0           | -3.884650               | -3.039554 | -0.818939 |
| 31            | 1             | 0           | -2.331134               | 0.474678  | -0.998724 |
| 32            | 1             | 0           | -4.372764               | -0.287351 | 0.481918  |
| 33            | 1             | 0           | 0.737351                | -3.157668 | 0.192479  |
| 34            | 1             | 0           | 0.218449                | -0.645850 | -0.339363 |
| 35            | 1             | 0           | -4.657125               | -0.764167 | -1.209179 |

|    |   |   |           |           |          |
|----|---|---|-----------|-----------|----------|
| 36 | 1 | 0 | 0.210376  | -2.334531 | 1.680374 |
| 37 | 6 | 0 | -1.929965 | 3.498323  | 1.707995 |
| 38 | 1 | 0 | -1.336705 | 3.688411  | 2.604771 |
| 39 | 1 | 0 | -2.308760 | 4.439709  | 1.299005 |
| 40 | 1 | 0 | -2.785236 | 2.857880  | 1.949747 |

---

*trans*-IM2

Standard orientation:

| Center<br>Number | Atomic<br>Number | Atomic<br>Type | Coordinates (Angstroms) |           |           |
|------------------|------------------|----------------|-------------------------|-----------|-----------|
|                  |                  |                | X                       | Y         | Z         |
| 1                | 6                | 0              | -1.670653               | 2.699498  | -0.398942 |
| 2                | 8                | 0              | -1.185674               | 2.753147  | 0.892996  |
| 3                | 8                | 0              | -2.740903               | 3.239258  | -0.692775 |
| 4                | 6                | 0              | -0.853786               | 1.913903  | -1.287693 |
| 5                | 6                | 0              | 2.780563                | 0.423091  | -0.346706 |
| 6                | 6                | 0              | 1.444974                | 0.811473  | -0.657315 |
| 7                | 6                | 0              | 0.394756                | 1.396135  | -0.952079 |
| 8                | 1                | 0              | -1.113745               | 2.005914  | -2.339611 |
| 9                | 6                | 0              | -1.969063               | 3.518587  | 1.811136  |
| 10               | 6                | 0              | 3.616063                | -0.178648 | -1.319557 |
| 11               | 6                | 0              | 4.913988                | -0.575432 | -1.000540 |
| 12               | 6                | 0              | 5.419487                | -0.395962 | 0.292624  |
| 13               | 6                | 0              | 4.604324                | 0.195297  | 1.265436  |
| 14               | 6                | 0              | 3.305660                | 0.598097  | 0.957789  |
| 15               | 1                | 0              | 3.234107                | -0.316460 | -2.326909 |
| 16               | 1                | 0              | 5.537568                | -1.025221 | -1.769189 |
| 17               | 1                | 0              | 6.432001                | -0.704629 | 0.535799  |
| 18               | 1                | 0              | 4.985857                | 0.351008  | 2.271522  |
| 19               | 1                | 0              | 2.683542                | 1.068271  | 1.713686  |
| 20               | 1                | 0              | -2.059985               | 4.557495  | 1.480171  |
| 21               | 1                | 0              | -2.975936               | 3.101963  | 1.920297  |
| 22               | 1                | 0              | -1.435024               | 3.471229  | 2.762416  |
| 23               | 6                | 0              | -1.356536               | -3.605703 | 0.676776  |
| 24               | 6                | 0              | -0.005755               | -2.848164 | 0.816560  |
| 25               | 7                | 0              | -2.281567               | -2.483999 | 0.472891  |
| 26               | 6                | 0              | -1.569093               | -1.463244 | -0.087451 |
| 27               | 7                | 0              | -0.258804               | -1.620438 | 0.041440  |
| 28               | 6                | 0              | -3.619640               | -2.464182 | -0.133189 |
| 29               | 6                | 0              | -3.737846               | -0.964100 | -0.526386 |
| 30               | 7                | 0              | -2.325959               | -0.578237 | -0.711751 |
| 31               | 1                | 0              | -1.608737               | -4.184014 | 1.567861  |
| 32               | 1                | 0              | -1.353921               | -4.273480 | -0.198359 |
| 33               | 1                | 0              | -4.389925               | -2.777557 | 0.574316  |
| 34               | 1                | 0              | -3.655791               | -3.116602 | -1.019168 |
| 35               | 1                | 0              | -1.944052               | 0.367593  | -0.992359 |
| 36               | 1                | 0              | -4.194221               | -0.372887 | 0.275686  |
| 37               | 1                | 0              | 0.835626                | -3.405707 | 0.401109  |
| 38               | 1                | 0              | -4.306970               | -0.811333 | -1.444979 |
| 39               | 1                | 0              | 0.209349                | -2.605952 | 1.863974  |
| 40               | 1                | 0              | 0.412536                | -0.854037 | -0.158874 |

---

*trans*-TS2

Standard orientation:

| Center<br>Number | Atomic<br>Number | Atomic<br>Type | Coordinates (Angstroms) |   |   |
|------------------|------------------|----------------|-------------------------|---|---|
|                  |                  |                | X                       | Y | Z |

---

|    |   |   |           |           |           |
|----|---|---|-----------|-----------|-----------|
| 1  | 6 | 0 | -0.917598 | 3.076309  | -0.272953 |
| 2  | 8 | 0 | -0.515823 | 2.985279  | 1.032052  |
| 3  | 8 | 0 | -1.733025 | 3.918558  | -0.638914 |
| 4  | 6 | 0 | -0.316033 | 2.073162  | -1.140284 |
| 5  | 6 | 0 | 2.691075  | -0.184239 | -0.203473 |
| 6  | 6 | 0 | 1.277261  | 0.146315  | -0.358575 |
| 7  | 6 | 0 | 0.596891  | 1.147927  | -0.748983 |
| 8  | 1 | 0 | -0.546218 | 2.200424  | -2.195979 |
| 9  | 1 | 0 | 0.233558  | -0.962718 | -0.054722 |
| 10 | 6 | 0 | -1.074680 | 3.960063  | 1.920003  |
| 11 | 6 | 0 | 3.637246  | 0.128059  | -1.202190 |
| 12 | 6 | 0 | 4.977627  | -0.229898 | -1.057018 |
| 13 | 6 | 0 | 5.412942  | -0.901826 | 0.090391  |
| 14 | 6 | 0 | 4.487859  | -1.216496 | 1.090134  |
| 15 | 6 | 0 | 3.143244  | -0.872622 | 0.940086  |
| 16 | 1 | 0 | 3.305435  | 0.652891  | -2.093030 |
| 17 | 1 | 0 | 5.687402  | 0.022673  | -1.840537 |
| 18 | 1 | 0 | 6.457909  | -1.176067 | 0.202932  |
| 19 | 1 | 0 | 4.813139  | -1.734196 | 1.988804  |
| 20 | 1 | 0 | 2.430242  | -1.119078 | 1.722438  |
| 21 | 6 | 0 | -2.178951 | -3.513365 | 0.420434  |
| 22 | 6 | 0 | -0.724026 | -3.045360 | 0.712296  |
| 23 | 7 | 0 | -2.862963 | -2.218020 | 0.321445  |
| 24 | 6 | 0 | -1.911208 | -1.309645 | -0.076859 |
| 25 | 7 | 0 | -0.673535 | -1.701467 | 0.103319  |
| 26 | 6 | 0 | -4.105688 | -1.892367 | -0.386172 |
| 27 | 6 | 0 | -3.929300 | -0.365193 | -0.600241 |
| 28 | 7 | 0 | -2.464361 | -0.235663 | -0.647573 |
| 29 | 1 | 0 | -2.595974 | -4.134291 | 1.216205  |
| 30 | 1 | 0 | -2.241316 | -4.059821 | -0.533799 |
| 31 | 1 | 0 | -4.989304 | -2.134170 | 0.208040  |
| 32 | 1 | 0 | -4.160859 | -2.425515 | -1.348343 |
| 33 | 1 | 0 | -1.933653 | 0.620421  | -0.844642 |
| 34 | 1 | 0 | -4.346744 | 0.205279  | 0.238283  |
| 35 | 1 | 0 | 0.025912  | -3.702449 | 0.266778  |
| 36 | 1 | 0 | -4.385060 | -0.015129 | -1.528486 |
| 37 | 1 | 0 | -0.539120 | -2.983760 | 1.792013  |
| 38 | 1 | 0 | -0.812226 | 4.973069  | 1.602168  |
| 39 | 1 | 0 | -2.165107 | 3.877784  | 1.959024  |
| 40 | 1 | 0 | -0.641191 | 3.745055  | 2.897830  |

*trans*-IM3

Standard orientation:

| Center Number | Atomic Number | Atomic Type | Coordinates (Angstroms) |           |           |
|---------------|---------------|-------------|-------------------------|-----------|-----------|
|               |               |             | X                       | Y         | Z         |
| 1             | 6             | 0           | 0.649361                | 3.243895  | -0.218022 |
| 2             | 8             | 0           | 0.933343                | 2.960026  | 1.071100  |
| 3             | 8             | 0           | 0.335913                | 4.355237  | -0.609443 |
| 4             | 6             | 0           | 0.751931                | 2.064827  | -1.116018 |
| 5             | 6             | 0           | 2.603668                | -1.039017 | -0.239381 |
| 6             | 6             | 0           | 1.281048                | -0.394699 | -0.352448 |
| 7             | 6             | 0           | 1.043050                | 0.839741  | -0.724821 |
| 8             | 1             | 0           | 0.576287                | 2.295207  | -2.165844 |
| 9             | 6             | 0           | 0.851513                | 4.065041  | 1.988398  |
| 10            | 6             | 0           | 3.804177                | -0.360418 | -0.519415 |
| 11            | 6             | 0           | 5.030103                | -1.012090 | -0.400630 |
| 12            | 6             | 0           | 5.082647                | -2.352669 | 0.001508  |
| 13            | 6             | 0           | 3.896512                | -3.035256 | 0.283219  |
| 14            | 6             | 0           | 2.666780                | -2.383924 | 0.163734  |

|    |   |   |           |           |           |
|----|---|---|-----------|-----------|-----------|
| 15 | 1 | 0 | 3.771150  | 0.680143  | -0.830234 |
| 16 | 1 | 0 | 5.948315  | -0.474583 | -0.620899 |
| 17 | 1 | 0 | 6.039910  | -2.857751 | 0.093632  |
| 18 | 1 | 0 | 3.926749  | -4.075274 | 0.596033  |
| 19 | 1 | 0 | 1.744210  | -2.914814 | 0.381796  |
| 20 | 1 | 0 | 1.555676  | 4.851249  | 1.704172  |
| 21 | 1 | 0 | -0.160154 | 4.478933  | 2.001466  |
| 22 | 1 | 0 | 1.110221  | 3.650388  | 2.962515  |
| 23 | 6 | 0 | -4.015664 | -2.544689 | 0.598367  |
| 24 | 6 | 0 | -2.517457 | -2.787997 | 0.958117  |
| 25 | 7 | 0 | -3.973834 | -1.105322 | 0.340363  |
| 26 | 6 | 0 | -2.656908 | -0.857822 | -0.059484 |
| 27 | 7 | 0 | -1.760829 | -1.731396 | 0.245769  |
| 28 | 6 | 0 | -4.858080 | -0.326802 | -0.519820 |
| 29 | 6 | 0 | -3.960001 | 0.899799  | -0.811888 |
| 30 | 7 | 0 | -2.623786 | 0.289865  | -0.812959 |
| 31 | 1 | 0 | -4.706061 | -2.799903 | 1.406926  |
| 32 | 1 | 0 | -4.307378 | -3.099270 | -0.310399 |
| 33 | 1 | 0 | -5.790308 | -0.052473 | -0.018956 |
| 34 | 1 | 0 | -5.098447 | -0.868034 | -1.451270 |
| 35 | 1 | 0 | -1.783238 | 0.850809  | -0.847432 |
| 36 | 1 | 0 | -4.068024 | 1.653916  | -0.019434 |
| 37 | 1 | 0 | -2.174967 | -3.781707 | 0.654196  |
| 38 | 1 | 0 | -4.185866 | 1.363945  | -1.775519 |
| 39 | 1 | 0 | -2.363498 | -2.698282 | 2.043304  |
| 40 | 1 | 0 | 0.404462  | -1.004147 | -0.098016 |

-----  
*cis*-COM'

Standard orientation:

| Center<br>Number | Atomic<br>Number | Atomic<br>Type | Coordinates (Angstroms) |           |           |
|------------------|------------------|----------------|-------------------------|-----------|-----------|
|                  |                  |                | X                       | Y         | Z         |
| 1                | 1                | 0              | 0.034386                | 0.867259  | -1.621904 |
| 2                | 6                | 0              | 1.834179                | 3.699439  | 0.390072  |
| 3                | 8                | 0              | 1.373717                | 2.477013  | -0.222533 |
| 4                | 6                | 0              | 0.105422                | 2.096749  | 0.120067  |
| 5                | 8                | 0              | -0.583504               | 2.740482  | 0.875811  |
| 6                | 6                | 0              | -0.250635               | 0.787645  | -0.564704 |
| 7                | 6                | 0              | -4.185232               | -0.307433 | -0.197030 |
| 8                | 6                | 0              | -2.812862               | 0.073901  | -0.329493 |
| 9                | 6                | 0              | -1.652868               | 0.413676  | -0.431226 |
| 10               | 1                | 0              | 0.407694                | 0.006536  | -0.141282 |
| 11               | 6                | 0              | -4.689340               | -1.433525 | -0.878755 |
| 12               | 6                | 0              | -6.028796               | -1.798874 | -0.744581 |
| 13               | 6                | 0              | -6.886693               | -1.051641 | 0.069132  |
| 14               | 6                | 0              | -6.395016               | 0.067085  | 0.750153  |
| 15               | 6                | 0              | -5.057205               | 0.439639  | 0.621121  |
| 16               | 1                | 0              | -4.022013               | -2.013114 | -1.509021 |
| 17               | 1                | 0              | -6.403506               | -2.669203 | -1.276204 |
| 18               | 1                | 0              | -7.929273               | -1.338811 | 0.172000  |
| 19               | 1                | 0              | -7.055585               | 0.651723  | 1.384427  |
| 20               | 1                | 0              | -4.672253               | 1.306847  | 1.148258  |
| 21               | 6                | 0              | 4.114874                | -2.611990 | 0.996792  |
| 22               | 6                | 0              | 2.555911                | -2.588564 | 0.985617  |
| 23               | 7                | 0              | 4.400932                | -1.677749 | -0.095835 |
| 24               | 6                | 0              | 3.263615                | -0.859177 | -0.153963 |
| 25               | 7                | 0              | 2.185787                | -1.274369 | 0.414914  |
| 26               | 6                | 0              | 5.567287                | -0.798971 | -0.165925 |
| 27               | 6                | 0              | 5.022642                | 0.376441  | -1.024600 |
| 28               | 7                | 0              | 3.572485                | 0.298956  | -0.809867 |

|    |   |   |          |           |           |
|----|---|---|----------|-----------|-----------|
| 29 | 1 | 0 | 4.538413 | -3.603286 | 0.813361  |
| 30 | 1 | 0 | 4.514368 | -2.225443 | 1.950721  |
| 31 | 1 | 0 | 6.428011 | -1.288295 | -0.629773 |
| 32 | 1 | 0 | 5.861013 | -0.451176 | 0.840306  |
| 33 | 1 | 0 | 2.969601 | 1.107341  | -0.727412 |
| 34 | 1 | 0 | 5.267575 | 0.235500  | -2.084844 |
| 35 | 1 | 0 | 2.132069 | -2.711488 | 1.986680  |
| 36 | 1 | 0 | 2.160525 | -3.397823 | 0.355126  |
| 37 | 1 | 0 | 5.430036 | 1.340176  | -0.703428 |
| 38 | 1 | 0 | 2.836090 | 3.867427  | -0.006143 |
| 39 | 1 | 0 | 1.174038 | 4.528315  | 0.125224  |
| 40 | 1 | 0 | 1.860980 | 3.593295  | 1.477140  |

*cis*-TS1'

Standard orientation:

| Center<br>Number | Atomic<br>Number | Atomic<br>Type | Coordinates (Angstroms) |           |           |
|------------------|------------------|----------------|-------------------------|-----------|-----------|
|                  |                  |                | X                       | Y         | Z         |
| 1                | 1                | 0              | 0.410497                | 1.131532  | -1.821302 |
| 2                | 6                | 0              | 2.511132                | 3.686072  | 0.188846  |
| 3                | 8                | 0              | 1.917168                | 2.561042  | -0.475918 |
| 4                | 6                | 0              | 0.633455                | 2.202987  | 0.015206  |
| 5                | 8                | 0              | 0.216058                | 2.730650  | 1.033035  |
| 6                | 6                | 0              | 0.059096                | 1.145773  | -0.788051 |
| 7                | 6                | 0              | -3.791153               | -0.020979 | -0.200229 |
| 8                | 6                | 0              | -2.447119               | 0.394780  | -0.417501 |
| 9                | 6                | 0              | -1.305268               | 0.792921  | -0.593814 |
| 10               | 1                | 0              | 0.773187                | -0.115601 | -0.240944 |
| 11               | 6                | 0              | -4.493444               | -0.765950 | -1.174838 |
| 12               | 6                | 0              | -5.810275               | -1.167723 | -0.953007 |
| 13               | 6                | 0              | -6.462297               | -0.840069 | 0.241049  |
| 14               | 6                | 0              | -5.778280               | -0.101889 | 1.213982  |
| 15               | 6                | 0              | -4.461618               | 0.303953  | 1.001531  |
| 16               | 1                | 0              | -3.993689               | -1.018348 | -2.105336 |
| 17               | 1                | 0              | -6.331662               | -1.737494 | -1.718042 |
| 18               | 1                | 0              | -7.488820               | -1.152891 | 0.409822  |
| 19               | 1                | 0              | -6.274796               | 0.161924  | 2.144289  |
| 20               | 1                | 0              | -3.934756               | 0.880602  | 1.755490  |
| 21               | 6                | 0              | 2.614147                | -3.027947 | 0.663341  |
| 22               | 6                | 0              | 1.209347                | -2.451995 | 0.312264  |
| 23               | 7                | 0              | 3.483067                | -2.063876 | -0.027028 |
| 24               | 6                | 0              | 2.767782                | -0.894221 | -0.101896 |
| 25               | 7                | 0              | 1.479339                | -1.015038 | 0.091383  |
| 26               | 6                | 0              | 4.876118                | -1.707423 | 0.260587  |
| 27               | 6                | 0              | 4.958539                | -0.294462 | -0.383830 |
| 28               | 7                | 0              | 3.564877                | 0.163634  | -0.289978 |
| 29               | 1                | 0              | 2.763511                | -4.045228 | 0.294881  |
| 30               | 1                | 0              | 2.796452                | -3.006764 | 1.749159  |
| 31               | 1                | 0              | 5.580009                | -2.412403 | -0.186680 |
| 32               | 1                | 0              | 5.054662                | -1.660363 | 1.346491  |
| 33               | 1                | 0              | 3.190717                | 1.095859  | -0.486044 |
| 34               | 1                | 0              | 5.285125                | -0.355647 | -1.429602 |
| 35               | 1                | 0              | 0.484745                | -2.589483 | 1.117039  |
| 36               | 1                | 0              | 0.809053                | -2.909431 | -0.600700 |
| 37               | 1                | 0              | 5.632601                | 0.371614  | 0.159620  |
| 38               | 1                | 0              | 3.453086                | 3.877536  | -0.330925 |
| 39               | 1                | 0              | 1.861387                | 4.562219  | 0.116654  |
| 40               | 1                | 0              | 2.690950                | 3.472838  | 1.246722  |



*cis*-IM1'

Standard orientation:

| Center<br>Number | Atomic<br>Number | Atomic<br>Type | Coordinates (Angstroms) |           |           |
|------------------|------------------|----------------|-------------------------|-----------|-----------|
|                  |                  |                | X                       | Y         | Z         |
| 1                | 1                | 0              | 0.539791                | 1.672945  | -1.944154 |
| 2                | 6                | 0              | 3.046582                | 3.493357  | 0.318584  |
| 3                | 8                | 0              | 2.296299                | 2.542356  | -0.446268 |
| 4                | 6                | 0              | 0.967749                | 2.281339  | 0.070399  |
| 5                | 8                | 0              | 0.736895                | 2.558697  | 1.244217  |
| 6                | 6                | 0              | 0.177973                | 1.649828  | -0.920067 |
| 7                | 6                | 0              | -3.550210               | 0.246510  | -0.198689 |
| 8                | 6                | 0              | -2.245602               | 0.740886  | -0.459005 |
| 9                | 6                | 0              | -1.133528               | 1.217125  | -0.669600 |
| 10               | 1                | 0              | 0.483537                | -0.267252 | -0.373569 |
| 11               | 6                | 0              | -4.345208               | -0.309001 | -1.230546 |
| 12               | 6                | 0              | -5.623475               | -0.796969 | -0.963866 |
| 13               | 6                | 0              | -6.149994               | -0.748687 | 0.332399  |
| 14               | 6                | 0              | -5.376146               | -0.199443 | 1.362238  |
| 15               | 6                | 0              | -4.097020               | 0.291451  | 1.107273  |
| 16               | 1                | 0              | -3.946280               | -0.343466 | -2.240112 |
| 17               | 1                | 0              | -6.215232               | -1.214412 | -1.774836 |
| 18               | 1                | 0              | -7.147673               | -1.127232 | 0.535567  |
| 19               | 1                | 0              | -5.774724               | -0.149183 | 2.372505  |
| 20               | 1                | 0              | -3.504225               | 0.723549  | 1.907784  |
| 21               | 6                | 0              | 1.951068                | -3.175134 | 0.532495  |
| 22               | 6                | 0              | 0.634310                | -2.496398 | 0.058201  |
| 23               | 7                | 0              | 2.961495                | -2.288871 | -0.066591 |
| 24               | 6                | 0              | 2.377921                | -1.060356 | -0.216428 |
| 25               | 7                | 0              | 1.061802                | -1.101164 | -0.146273 |
| 26               | 6                | 0              | 4.346297                | -2.060624 | 0.365659  |
| 27               | 6                | 0              | 4.617736                | -0.652175 | -0.234660 |
| 28               | 7                | 0              | 3.262903                | -0.079609 | -0.326256 |
| 29               | 1                | 0              | 2.049899                | -4.201145 | 0.172857  |
| 30               | 1                | 0              | 2.033620                | -3.167292 | 1.629804  |
| 31               | 1                | 0              | 5.024610                | -2.820884 | -0.026499 |
| 32               | 1                | 0              | 4.413858                | -2.049159 | 1.464258  |
| 33               | 1                | 0              | 3.011159                | 0.920242  | -0.451761 |
| 34               | 1                | 0              | 5.073567                | -0.723816 | -1.229184 |
| 35               | 1                | 0              | -0.163148               | -2.550279 | 0.800937  |
| 36               | 1                | 0              | 0.273889                | -2.928084 | -0.882368 |
| 37               | 1                | 0              | 5.257940                | -0.041256 | 0.405207  |
| 38               | 1                | 0              | 4.022958                | 3.572183  | -0.166940 |
| 39               | 1                | 0              | 2.551265                | 4.469460  | 0.305210  |
| 40               | 1                | 0              | 3.155528                | 3.173903  | 1.359217  |

*trans*-COM'

Standard orientation:

| Center<br>Number | Atomic<br>Number | Atomic<br>Type | Coordinates (Angstroms) |           |           |
|------------------|------------------|----------------|-------------------------|-----------|-----------|
|                  |                  |                | X                       | Y         | Z         |
| 1                | 6                | 0              | -0.966902               | 3.047818  | -0.422353 |
| 2                | 8                | 0              | -0.955435               | 2.550417  | 0.838646  |
| 3                | 8                | 0              | -1.373507               | 4.156668  | -0.693222 |
| 4                | 6                | 0              | -0.472161               | 2.035485  | -1.445713 |
| 5                | 6                | 0              | 2.943502                | -0.004930 | -0.429650 |
| 6                | 6                | 0              | 1.757184                | 0.716239  | -0.777157 |
| 7                | 6                | 0              | 0.746501                | 1.322291  | -1.069293 |

|    |   |   |           |           |           |
|----|---|---|-----------|-----------|-----------|
| 8  | 1 | 0 | -0.338102 | 2.578318  | -2.386339 |
| 9  | 6 | 0 | -1.480566 | 3.425001  | 1.859004  |
| 10 | 6 | 0 | 3.043088  | -1.387081 | -0.691020 |
| 11 | 6 | 0 | 4.200611  | -2.087998 | -0.352941 |
| 12 | 6 | 0 | 5.275686  | -1.427212 | 0.250734  |
| 13 | 6 | 0 | 5.186640  | -0.056303 | 0.514034  |
| 14 | 6 | 0 | 4.033100  | 0.652012  | 0.177567  |
| 15 | 1 | 0 | 2.208059  | -1.897220 | -1.161149 |
| 16 | 1 | 0 | 4.264277  | -3.152133 | -0.562550 |
| 17 | 1 | 0 | 6.176093  | -1.975655 | 0.512221  |
| 18 | 1 | 0 | 6.018658  | 0.463362  | 0.980929  |
| 19 | 1 | 0 | 3.963487  | 1.716547  | 0.378300  |
| 20 | 1 | 0 | -1.291414 | 1.306334  | -1.586350 |
| 21 | 6 | 0 | -3.337198 | -2.779232 | -0.848715 |
| 22 | 6 | 0 | -3.190693 | -1.593882 | -1.852973 |
| 23 | 7 | 0 | -2.313132 | -2.400495 | 0.124504  |
| 24 | 6 | 0 | -2.225645 | -1.008796 | 0.020384  |
| 25 | 7 | 0 | -2.674236 | -0.457222 | -1.054902 |
| 26 | 6 | 0 | -2.244437 | -2.748970 | 1.538679  |
| 27 | 6 | 0 | -1.334283 | -1.610987 | 2.062655  |
| 28 | 7 | 0 | -1.726767 | -0.496138 | 1.191419  |
| 29 | 1 | 0 | -3.141242 | -3.757595 | -1.296157 |
| 30 | 1 | 0 | -4.338156 | -2.792371 | -0.383137 |
| 31 | 1 | 0 | -2.478152 | -1.853162 | -2.649828 |
| 32 | 1 | 0 | -1.812665 | -3.739893 | 1.703211  |
| 33 | 1 | 0 | -3.238768 | -2.708597 | 2.016812  |
| 34 | 1 | 0 | -1.520648 | -1.379467 | 3.115050  |
| 35 | 1 | 0 | -1.216534 | 0.379158  | 1.174029  |
| 36 | 1 | 0 | -0.274887 | -1.876896 | 1.938916  |
| 37 | 1 | 0 | -4.140943 | -1.332995 | -2.328216 |
| 38 | 1 | 0 | -2.527282 | 3.659631  | 1.652704  |
| 39 | 1 | 0 | -0.901500 | 4.350341  | 1.898192  |
| 40 | 1 | 0 | -1.386361 | 2.871881  | 2.793374  |

*trans*-TS1'

Standard orientation:

| Center<br>Number | Atomic<br>Number | Atomic<br>Type | Coordinates (Angstroms) |           |           |
|------------------|------------------|----------------|-------------------------|-----------|-----------|
|                  |                  |                | X                       | Y         | Z         |
| 1                | 6                | 0              | 2.037613                | -2.383568 | -0.550362 |
| 2                | 8                | 0              | 1.716965                | -2.208765 | 0.799075  |
| 3                | 8                | 0              | 3.026117                | -3.030198 | -0.865924 |
| 4                | 6                | 0              | 1.158593                | -1.642183 | -1.440873 |
| 5                | 6                | 0              | -2.645156               | -0.641274 | -0.400311 |
| 6                | 6                | 0              | -1.319243               | -1.009897 | -0.765283 |
| 7                | 6                | 0              | -0.187284               | -1.361183 | -1.069114 |
| 8                | 1                | 0              | 1.311219                | -1.930742 | -2.481230 |
| 9                | 6                | 0              | 2.556678                | -2.926901 | 1.716455  |
| 10               | 6                | 0              | -3.121062               | -0.846057 | 0.915806  |
| 11               | 6                | 0              | -4.418029               | -0.477723 | 1.271751  |
| 12               | 6                | 0              | -5.277774               | 0.099063  | 0.330087  |
| 13               | 6                | 0              | -4.822181               | 0.301833  | -0.977572 |
| 14               | 6                | 0              | -3.525528               | -0.059356 | -1.341346 |
| 15               | 1                | 0              | -2.463846               | -1.309278 | 1.645874  |
| 16               | 1                | 0              | -4.762953               | -0.649747 | 2.288178  |
| 17               | 1                | 0              | -6.288984               | 0.380615  | 0.609287  |
| 18               | 1                | 0              | -5.481971               | 0.743330  | -1.720014 |
| 19               | 1                | 0              | -3.178259               | 0.098379  | -2.357982 |
| 20               | 1                | 0              | 1.761880                | -0.244541 | -1.344078 |
| 21               | 6                | 0              | 1.882492                | 3.285344  | -0.983313 |

|    |   |   |           |           |           |
|----|---|---|-----------|-----------|-----------|
| 22 | 6 | 0 | 1.979089  | 2.072289  | -1.955350 |
| 23 | 7 | 0 | 1.246860  | 2.639108  | 0.167473  |
| 24 | 6 | 0 | 1.576606  | 1.314020  | 0.106301  |
| 25 | 7 | 0 | 2.045165  | 0.901210  | -1.050288 |
| 26 | 6 | 0 | 1.172356  | 3.028051  | 1.575458  |
| 27 | 6 | 0 | 0.790645  | 1.667301  | 2.220032  |
| 28 | 7 | 0 | 1.420239  | 0.708330  | 1.295561  |
| 29 | 1 | 0 | 1.275468  | 4.103180  | -1.378309 |
| 30 | 1 | 0 | 2.879593  | 3.670766  | -0.717874 |
| 31 | 1 | 0 | 1.086317  | 2.008351  | -2.590483 |
| 32 | 1 | 0 | 0.418121  | 3.798706  | 1.748708  |
| 33 | 1 | 0 | 2.147024  | 3.386712  | 1.942856  |
| 34 | 1 | 0 | 1.186670  | 1.558302  | 3.232001  |
| 35 | 1 | 0 | 1.318941  | -0.306777 | 1.343606  |
| 36 | 1 | 0 | -0.298413 | 1.536374  | 2.240440  |
| 37 | 1 | 0 | 2.862897  | 2.119490  | -2.595185 |
| 38 | 1 | 0 | 3.591836  | -2.579411 | 1.654944  |
| 39 | 1 | 0 | 2.531799  | -3.998034 | 1.501321  |
| 40 | 1 | 0 | 2.145276  | -2.733052 | 2.709314  |

*trans*-IM1'

Standard orientation:

| Center<br>Number | Atomic<br>Number | Atomic<br>Type | Coordinates (Angstroms) |           |           |
|------------------|------------------|----------------|-------------------------|-----------|-----------|
|                  |                  |                | X                       | Y         | Z         |
| 1                | 6                | 0              | 2.741888                | -1.816218 | -0.588976 |
| 2                | 8                | 0              | 2.355123                | -1.696128 | 0.775591  |
| 3                | 8                | 0              | 3.906159                | -2.110066 | -0.848042 |
| 4                | 6                | 0              | 1.687929                | -1.506567 | -1.499673 |
| 5                | 6                | 0              | -2.202885               | -1.129807 | -0.451925 |
| 6                | 6                | 0              | -0.846182               | -1.266437 | -0.839636 |
| 7                | 6                | 0              | 0.335319                | -1.426482 | -1.141845 |
| 8                | 1                | 0              | 1.943148                | -1.660467 | -2.545029 |
| 9                | 6                | 0              | 3.358359                | -2.103257 | 1.715702  |
| 10               | 6                | 0              | -2.609128               | -1.368121 | 0.886124  |
| 11               | 6                | 0              | -3.940374               | -1.215728 | 1.270580  |
| 12               | 6                | 0              | -4.913455               | -0.829341 | 0.340810  |
| 13               | 6                | 0              | -4.531291               | -0.603122 | -0.987328 |
| 14               | 6                | 0              | -3.202213               | -0.746476 | -1.381215 |
| 15               | 1                | 0              | -1.866802               | -1.698621 | 1.607361  |
| 16               | 1                | 0              | -4.223971               | -1.413462 | 2.301582  |
| 17               | 1                | 0              | -5.950808               | -0.718537 | 0.642645  |
| 18               | 1                | 0              | -5.276907               | -0.314126 | -1.723918 |
| 19               | 1                | 0              | -2.917121               | -0.572410 | -2.414622 |
| 20               | 1                | 0              | 1.846719                | 0.500585  | -1.427003 |
| 21               | 6                | 0              | 0.474873                | 3.523331  | -0.855629 |
| 22               | 6                | 0              | 1.035040                | 2.526686  | -1.909064 |
| 23               | 7                | 0              | 0.207350                | 2.605604  | 0.253679  |
| 24               | 6                | 0              | 1.022210                | 1.532904  | 0.122460  |
| 25               | 7                | 0              | 1.618727                | 1.459982  | -1.065350 |
| 26               | 6                | 0              | -0.057223               | 2.816635  | 1.678460  |
| 27               | 6                | 0              | 0.170858                | 1.376631  | 2.218999  |
| 28               | 7                | 0              | 1.133412                | 0.825568  | 1.243044  |
| 29               | 1                | 0              | -0.432661               | 4.027878  | -1.193406 |
| 30               | 1                | 0              | 1.224762                | 4.276851  | -0.571355 |
| 31               | 1                | 0              | 0.230944                | 2.118319  | -2.532155 |
| 32               | 1                | 0              | -1.074231               | 3.172309  | 1.854553  |
| 33               | 1                | 0              | 0.658966                | 3.531907  | 2.110508  |
| 34               | 1                | 0              | 0.588081                | 1.369147  | 3.227745  |
| 35               | 1                | 0              | 1.466225                | -0.151296 | 1.215666  |

Supplementary Material (ESI) for Organic & Biomolecular Chemistry  
This journal is (c) The Royal Society of Chemistry 2011

|    |   |   |           |           |           |
|----|---|---|-----------|-----------|-----------|
| 36 | 1 | 0 | -0.760732 | 0.799855  | 2.202375  |
| 37 | 1 | 0 | 1.795580  | 2.976827  | -2.549460 |
| 38 | 1 | 0 | 4.257502  | -1.486545 | 1.628592  |
| 39 | 1 | 0 | 3.634827  | -3.148505 | 1.554443  |
| 40 | 1 | 0 | 2.907436  | -1.986032 | 2.704415  |

---

*S3: Comparison of the energies of all optimized stationary points along cis-path at the B3LTP/6-31+G(d,p) and B3LYP/6-311++G(d,p) levels*

| Species         | B3LYP/6-311++G(d,p) |                         |                | B3LYP/6-31+G(d,p) |                         |                |
|-----------------|---------------------|-------------------------|----------------|-------------------|-------------------------|----------------|
|                 | ZPE (a.u.)          | $E_{\text{ZPE}}$ (a.u.) | $E_r$ (kJ/mol) | ZPE (a.u.)        | $E_{\text{ZPE}}$ (a.u.) | $E_r$ (kJ/mol) |
| <i>cis</i> -COM | 0.328726            | -935.718267             | 0.0            | 0.329802          | -935.503328             | 0.0            |
| <i>cis</i> -TS1 | 0.324355            | -935.701109             | 45.0           | 0.325445          | -935.486876             | 43.2           |
| <i>cis</i> -IM1 | 0.328498            | -935.705105             | 34.5           | 0.329353          | -935.490612             | 33.4           |
| <i>cis</i> -TSR | 0.327673            | -935.704358             | 36.5           | 0.328403          | -935.489907             | 35.2           |
| <i>cis</i> -IM2 | 0.327657            | -935.706202             | 31.6           | 0.328489          | -935.491882             | 30.0           |
| <i>cis</i> -TS2 | 0.323915            | -935.702749             | 40.7           | 0.325110          | -935.489572             | 36.1           |
| <i>cis</i> -IM3 | 0.328122            | -935.725407             | -18.7          | 0.329371          | -935.511965             | -22.7          |

### S4. Preliminary results and discussion of model system

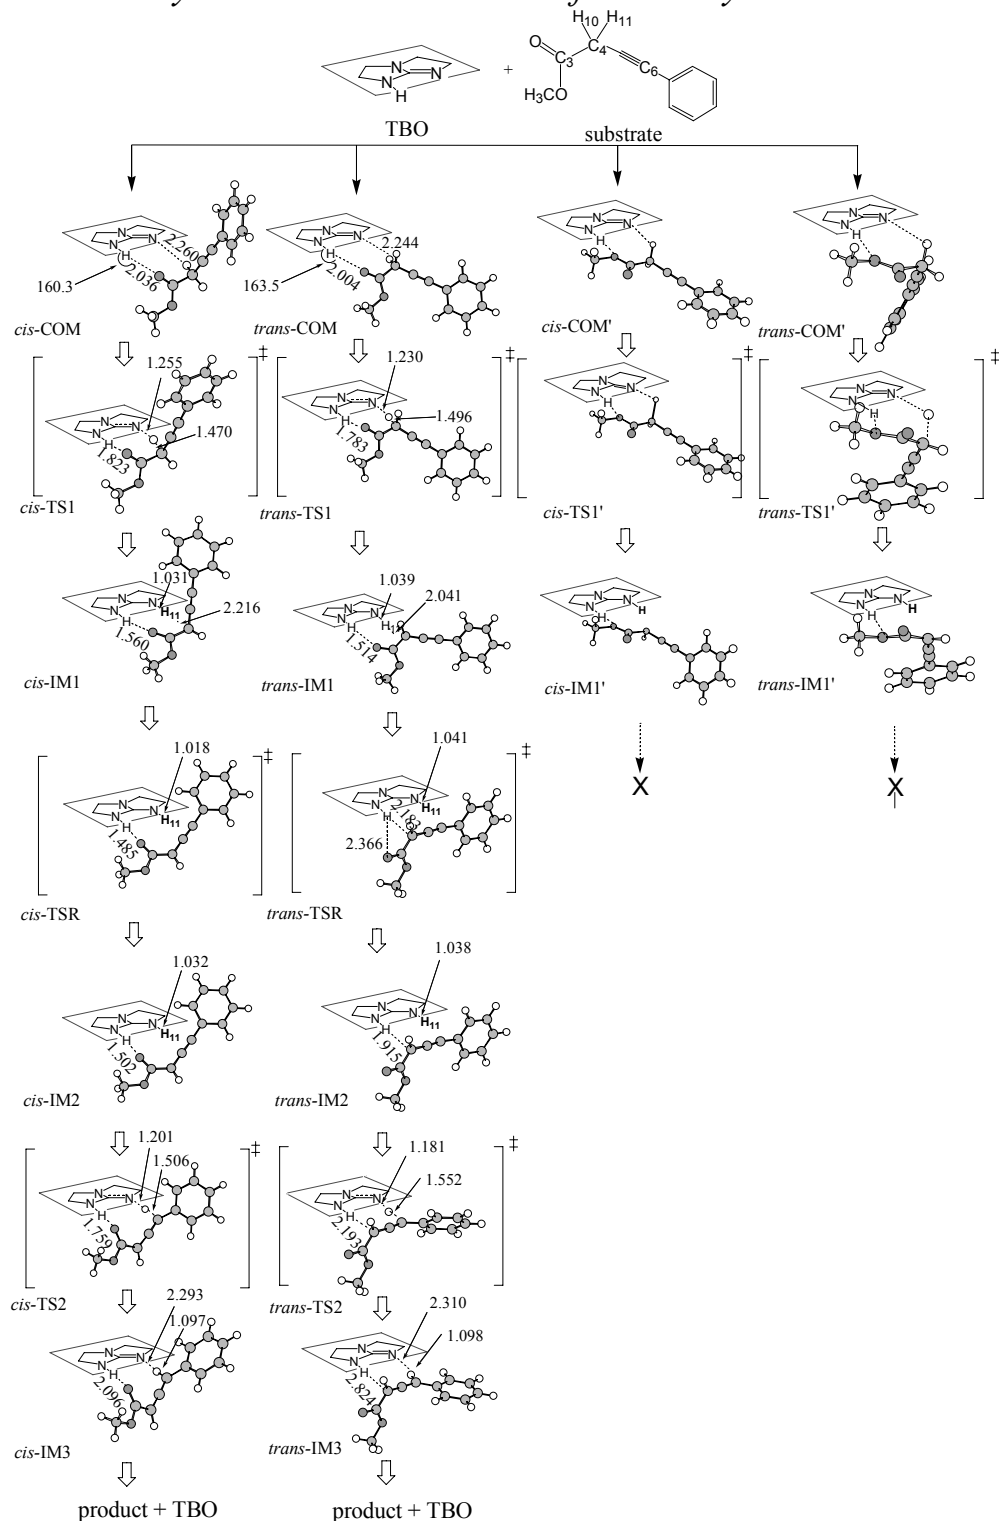

**Figure S1.** Predicted reaction mechanism of the model system. The bond lengths are in angstroms and the angles are in degrees.

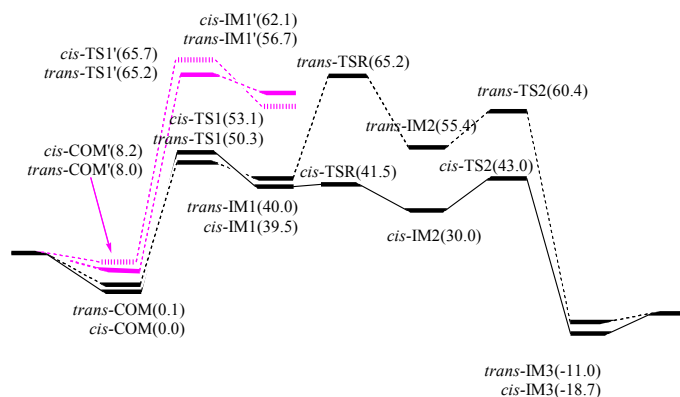

**Figure S2.** The potential energy profile calculated at the B3LYP/6-31+G(d,p) level. The relative Gibbs free energies (in kJ/mol) are listed in parentheses.

The optimized structures and the reaction routes are depicted in Figure S1. The potential energy surfaces (PES) of the calculated reaction pathways are shown in Figure S2.

The predicted energy-favored reaction paths (*cis*-path & *trans*-path) are composed of three reaction steps: 1) deprotonation of the substrate, corresponding to the migration of the hydrogen atom ( $H_{11}$ ) atom from  $C_4$  to guanidine moiety; 2) conformational change step, corresponding to the rotation (*cis*-path) or parallel move (*trans*-path) of the substrate with respect to the guanidine moiety; 3) hydrogen transfer from the guanidine moiety to the substrate with the of recovery of the catalyst.

As shown in Figure 2S, the largest energy barrier lies in the step from COM to TS1, which means that the deprotonation of the substrate might be the RDS for overall reaction.

On the other hand, apart from *cis*-COM and *trans*-COM, the calculations identified other two catalyst-substrate complexes *cis*-COM' and *trans*-COM' in the entrance of the reaction. From either *cis*-COM' or *trans*-COM, the deprotonation of the substrate could occur along the reaction path marked as *cis*-path' or *trans*-path', respectively. However, the calculations met the failure to locate subsequent steps connecting *cis*-IM1' or *trans*-IM1' to the final product, suggesting that these incomplete reaction routes might be the dead paths in reaction mechanism. For these reasons, *cis*-path' and *trans*-path' will not be taken into account for the following discussion.

## Part II: Actual system

S5: Summarize energies of all species over actual reaction system.

| Species                | $E_{zpe}$    | $E_r$ | $G_c^a$  | $SCF_{PCM}^b$ | $SCF_{PCM}+G_c$ | $G_r$ |
|------------------------|--------------|-------|----------|---------------|-----------------|-------|
| sub + cat              | -1367.679028 | 30.7  | 0.550836 | -1368.344477  | -1367.793641    | -11.6 |
| <i>anti-cis</i> -COM   | -1367.690739 | 0.0   | 0.564703 | -1368.353938  | -1367.789235    | 0.0   |
| <i>anti-cis</i> -TS1   | -1367.674315 | 43.1  | 0.564203 | -1368.333639  | -1367.769436    | 52.0  |
| <i>anti-cis</i> -IM1   | -1367.677804 | 33.9  | 0.567177 | -1368.341972  | -1367.774795    | 37.9  |
| <i>anti-cis</i> -TSR   | -1367.677891 | 33.7  | 0.568611 | -1368.341682  | -1367.773071    | 42.4  |
| <i>anti-cis</i> -IM2   | -1367.679618 | 29.2  | 0.567189 | -1368.343987  | -1367.776798    | 32.6  |
| <i>anti-cis</i> -TS2   | -1367.676769 | 36.7  | 0.563963 | -1368.336434  | -1367.772471    | 44.0  |
| <i>anti-cis</i> -IM3   | -1367.698060 | -19.2 | 0.565375 | -1368.360811  | -1367.795436    | -16.3 |
| pro + cat              | -1367.687842 | 7.6   | 0.547395 | -1368.352896  | -1367.805501    | -42.7 |
| <i>anti-trans</i> -COM | -1367.690620 | 0.3   | 0.565116 | -1368.354314  | -1367.789198    | 0.1   |
| <i>anti-trans</i> -TS1 | -1367.673836 | 44.4  | 0.562657 | -1368.333626  | -1367.770969    | 47.9  |
| <i>anti-trans</i> -IM1 | -1367.676094 | 38.4  | 0.565414 | -1368.340912  | -1367.775498    | 36.0  |
| <i>anti-trans</i> -TSR | -1367.665446 | 66.4  | 0.568532 | -1368.331163  | -1367.762631    | 69.8  |
| <i>anti-trans</i> -IM2 | -1367.667525 | 60.9  | 0.565728 | -1368.332570  | -1367.766842    | 58.8  |
| <i>anti-trans</i> -TS2 | -1367.667474 | 61.0  | 0.563019 | -1368.327869  | -1367.764850    | 64.0  |
| <i>anti-trans</i> -IM3 | -1367.693550 | -7.4  | 0.562717 | -1368.356720  | -1367.794003    | -12.5 |
| <i>syn-cis</i> -COM    | -1367.689608 | 3.0   | 0.564936 | -1368.353275  | -1367.788339    | 2.4   |
| <i>syn-cis</i> -TS1    | -1367.672572 | 47.7  | 0.563573 | -1368.332035  | -1367.768462    | 54.5  |
| <i>syn-cis</i> -IM1    | -1367.677096 | 35.8  | 0.567691 | -1368.341930  | -1367.774239    | 39.4  |
| <i>syn-cis</i> -TSR    | -1367.674465 | 42.7  | 0.569632 | -1368.339178  | -1367.769546    | 51.7  |
| <i>syn-cis</i> -IM2    | -1367.672041 | 49.1  | 0.566911 | -1368.337339  | -1367.770428    | 49.3  |
| <i>syn-cis</i> -TS2    | -1367.671165 | 51.4  | 0.564067 | -1368.330832  | -1367.766765    | 59.0  |
| <i>syn-cis</i> -IM3    | -1367.694655 | -10.3 | 0.564776 | -1368.357608  | -1367.792832    | -9.4  |
| <i>syn-trans</i> -COM  | -1367.689763 | 2.6   | 0.564336 | -1368.353451  | -1367.789115    | 0.3   |
| <i>syn-trans</i> -TS1  | -1367.671122 | 51.5  | 0.563158 | -1368.331108  | -1367.767950    | 55.9  |
| <i>syn-trans</i> -IM1  | -1367.674498 | 43.6  | 0.566758 | -1368.339747  | -1367.772989    | 42.6  |
| <i>syn-trans</i> -TSR  | -1367.663289 | 72.1  | 0.569518 | -1368.329584  | -1367.760066    | 76.5  |
| <i>syn-trans</i> -IM2  | -1367.665813 | 65.4  | 0.566475 | -1368.331282  | -1367.764807    | 64.1  |
| <i>syn-trans</i> -TS2  | -1367.666022 | 64.9  | 0.563437 | -1368.326401  | -1367.762964    | 68.9  |
| <i>syn-trans</i> -IM3  | -1367.692824 | -5.5  | 0.564201 | -1368.356213  | -1367.792012    | -7.3  |

a: Thermal correction to Gibbs Free Energy.

b: Total electronic energies in solvent.



*S6. Cartesian coordinates and energies of all optimized TSs over actual reaction system.*

*anti-cis-COM*

Standard orientation:

| Center Number | Atomic Number | Atomic Type | Coordinates (Angstroms) |           |           |
|---------------|---------------|-------------|-------------------------|-----------|-----------|
|               |               |             | X                       | Y         | Z         |
| 1             | 6             | 0           | 0.142607                | 2.410634  | 0.056510  |
| 2             | 8             | 0           | 0.734625                | 3.602801  | -0.077985 |
| 3             | 8             | 0           | -0.039071               | 1.831433  | 1.115766  |
| 4             | 6             | 0           | -0.241186               | 1.836138  | -1.304408 |
| 5             | 6             | 0           | -4.103162               | 0.450695  | -1.441337 |
| 6             | 6             | 0           | -2.757975               | 0.935608  | -1.390045 |
| 7             | 6             | 0           | -1.614271               | 1.339615  | -1.343256 |
| 8             | 1             | 0           | -0.077289               | 2.593024  | -2.077540 |
| 9             | 1             | 0           | 0.468099                | 1.006328  | -1.484496 |
| 10            | 6             | 0           | 1.277858                | 4.362418  | 1.076801  |
| 11            | 6             | 0           | -4.533245               | -0.362227 | -2.509912 |
| 12            | 6             | 0           | -5.845126               | -0.833705 | -2.555267 |
| 13            | 6             | 0           | -6.749309               | -0.506431 | -1.539425 |
| 14            | 6             | 0           | -6.332165               | 0.299497  | -0.474917 |
| 15            | 6             | 0           | -5.022543               | 0.776473  | -0.423270 |
| 16            | 1             | 0           | -3.829914               | -0.616784 | -3.296602 |
| 17            | 1             | 0           | -6.162195               | -1.458800 | -3.385407 |
| 18            | 1             | 0           | -7.770244               | -0.875484 | -1.577354 |
| 19            | 1             | 0           | -7.029154               | 0.558424  | 0.317315  |
| 20            | 1             | 0           | -4.697272               | 1.402455  | 0.401819  |
| 21            | 6             | 0           | 2.841869                | -1.622929 | -1.665240 |
| 22            | 7             | 0           | 1.999353                | -2.620702 | 0.278992  |
| 23            | 6             | 0           | 1.435203                | -1.374849 | 0.022875  |
| 24            | 7             | 0           | 1.864006                | -0.720380 | -1.005765 |
| 25            | 6             | 0           | 0.364829                | -2.239734 | 1.893047  |
| 26            | 7             | 0           | 0.437909                | -1.136249 | 0.923414  |
| 27            | 1             | 0           | 0.156251                | -0.183397 | 1.138182  |
| 28            | 1             | 0           | 0.982827                | -2.007007 | 2.777080  |
| 29            | 1             | 0           | 2.567809                | -1.706797 | -2.725579 |
| 30            | 6             | 0           | 1.073761                | -3.382111 | 1.106527  |
| 31            | 6             | 0           | 2.636709                | -3.021889 | -0.969405 |
| 32            | 1             | 0           | 1.593598                | -4.076722 | 1.771747  |
| 33            | 1             | 0           | 0.359137                | -3.952991 | 0.490294  |
| 34            | 1             | 0           | 3.566122                | -3.569568 | -0.790586 |
| 35            | 1             | 0           | 1.968073                | -3.663587 | -1.567495 |
| 36            | 6             | 0           | 4.302129                | -1.069224 | -1.642402 |
| 37            | 6             | 0           | 4.842372                | -0.942426 | -0.205598 |
| 38            | 1             | 0           | 4.202943                | -0.287231 | 0.394208  |
| 39            | 1             | 0           | 4.897625                | -1.913745 | 0.297616  |
| 40            | 1             | 0           | 5.852164                | -0.514687 | -0.215690 |
| 41            | 6             | 0           | 4.300234                | 0.322975  | -2.307103 |
| 42            | 1             | 0           | 5.316374                | 0.734493  | -2.339314 |
| 43            | 1             | 0           | 3.927798                | 0.268633  | -3.337741 |
| 44            | 1             | 0           | 3.659341                | 1.015899  | -1.755737 |
| 45            | 6             | 0           | 5.216307                | -2.002675 | -2.463205 |
| 46            | 1             | 0           | 4.840909                | -2.125855 | -3.486855 |
| 47            | 1             | 0           | 6.227885                | -1.585376 | -2.529540 |
| 48            | 1             | 0           | 5.304814                | -2.998869 | -2.015299 |
| 49            | 6             | 0           | -1.071584               | -2.532128 | 2.406760  |
| 50            | 6             | 0           | -1.556386               | -1.308684 | 3.214879  |
| 51            | 1             | 0           | -1.647403               | -0.416109 | 2.587156  |

|    |   |   |           |           |           |
|----|---|---|-----------|-----------|-----------|
| 52 | 1 | 0 | -2.542451 | -1.506230 | 3.650366  |
| 53 | 1 | 0 | -0.867736 | -1.078098 | 4.036973  |
| 54 | 6 | 0 | -1.013315 | -3.756658 | 3.343357  |
| 55 | 1 | 0 | -1.997299 | -3.943215 | 3.787595  |
| 56 | 1 | 0 | -0.717227 | -4.665753 | 2.807679  |
| 57 | 1 | 0 | -0.302713 | -3.599836 | 4.164409  |
| 58 | 6 | 0 | -2.061032 | -2.797246 | 1.255830  |
| 59 | 1 | 0 | -2.084847 | -1.959277 | 0.553632  |
| 60 | 1 | 0 | -1.807401 | -3.702531 | 0.693477  |
| 61 | 1 | 0 | -3.071202 | -2.935774 | 1.657412  |
| 62 | 6 | 0 | 1.858215  | 5.608937  | 0.404146  |
| 63 | 1 | 0 | 2.294866  | 6.270023  | 1.159331  |
| 64 | 1 | 0 | 2.639760  | 5.334047  | -0.310596 |
| 65 | 1 | 0 | 1.077949  | 6.159225  | -0.130238 |
| 66 | 6 | 0 | 2.380642  | 3.551045  | 1.764609  |
| 67 | 1 | 0 | 1.979253  | 2.668588  | 2.264745  |
| 68 | 1 | 0 | 3.133662  | 3.234162  | 1.036114  |
| 69 | 1 | 0 | 2.875456  | 4.180850  | 2.511738  |
| 70 | 6 | 0 | 0.138013  | 4.735886  | 2.029840  |
| 71 | 1 | 0 | 0.525179  | 5.397977  | 2.811798  |
| 72 | 1 | 0 | -0.650105 | 5.272343  | 1.491350  |
| 73 | 1 | 0 | -0.293451 | 3.852661  | 2.502957  |

-----  
*anti-cis*-TS1

Standard orientation:

| Center<br>Number | Atomic<br>Number | Atomic<br>Type | Coordinates (Angstroms) |           |           |
|------------------|------------------|----------------|-------------------------|-----------|-----------|
|                  |                  |                | X                       | Y         | Z         |
| 1                | 6                | 0              | -1.272221               | -2.063088 | -0.503382 |
| 2                | 8                | 0              | -2.455928               | -2.597175 | -0.901686 |
| 3                | 8                | 0              | -0.850307               | -2.169084 | 0.659664  |
| 4                | 6                | 0              | -0.652221               | -1.275554 | -1.563281 |
| 5                | 6                | 0              | 3.401978                | -0.939631 | -1.794897 |
| 6                | 6                | 0              | 1.985515                | -1.063803 | -1.690489 |
| 7                | 6                | 0              | 0.774741                | -1.205614 | -1.613017 |
| 8                | 1                | 0              | -1.131887               | -1.406759 | -2.534542 |
| 9                | 6                | 0              | -3.350728               | -3.322846 | 0.011653  |
| 10               | 6                | 0              | 4.261316                | -1.625371 | -0.907051 |
| 11               | 6                | 0              | 5.645841                | -1.498191 | -1.014358 |
| 12               | 6                | 0              | 6.211100                | -0.693690 | -2.010073 |
| 13               | 6                | 0              | 5.371986                | -0.014836 | -2.900650 |
| 14               | 6                | 0              | 3.986326                | -0.131177 | -2.795994 |
| 15               | 1                | 0              | 3.826946                | -2.261626 | -0.142139 |
| 16               | 1                | 0              | 6.287694                | -2.036051 | -0.321381 |
| 17               | 1                | 0              | 7.290142                | -0.600813 | -2.093612 |
| 18               | 1                | 0              | 5.799200                | 0.609232  | -3.681327 |
| 19               | 1                | 0              | 3.338476                | 0.397380  | -3.488852 |
| 20               | 1                | 0              | -1.012368               | 0.070902  | -1.112303 |
| 21               | 6                | 0              | -0.410140               | 3.431211  | -0.139116 |
| 22               | 6                | 0              | -1.198248               | 2.533554  | -1.162830 |
| 23               | 7                | 0              | -0.427008               | 2.605134  | 1.070280  |
| 24               | 6                | 0              | -0.649051               | 1.314751  | 0.657038  |
| 25               | 7                | 0              | -1.165811               | 1.184615  | -0.542845 |
| 26               | 6                | 0              | 0.564725                | 2.566333  | 2.147892  |
| 27               | 6                | 0              | 0.363063                | 1.125672  | 2.718996  |
| 28               | 7                | 0              | -0.227338               | 0.428963  | 1.560782  |
| 29               | 1                | 0              | -0.881838               | 4.401182  | 0.033978  |
| 30               | 1                | 0              | 0.623107                | 3.603141  | -0.476827 |
| 31               | 1                | 0              | 0.374328                | 3.334348  | 2.900960  |
| 32               | 1                | 0              | 1.580061                | 2.706818  | 1.747091  |

|    |   |   |           |           |           |
|----|---|---|-----------|-----------|-----------|
| 33 | 1 | 0 | -0.335376 | -0.583929 | 1.421535  |
| 34 | 1 | 0 | -0.640992 | 2.487644  | -2.106933 |
| 35 | 1 | 0 | -0.386372 | 1.175890  | 3.523950  |
| 36 | 6 | 0 | 1.618458  | 0.424092  | 3.303094  |
| 37 | 6 | 0 | 1.193272  | -0.956169 | 3.850903  |
| 38 | 1 | 0 | 0.847766  | -1.625093 | 3.055895  |
| 39 | 1 | 0 | 2.041893  | -1.444056 | 4.342673  |
| 40 | 1 | 0 | 0.389077  | -0.860982 | 4.590649  |
| 41 | 6 | 0 | 2.148041  | 1.284871  | 4.469109  |
| 42 | 1 | 0 | 1.378204  | 1.443739  | 5.234346  |
| 43 | 1 | 0 | 2.996321  | 0.787409  | 4.951347  |
| 44 | 1 | 0 | 2.496217  | 2.266595  | 4.127928  |
| 45 | 6 | 0 | 2.722164  | 0.230744  | 2.246210  |
| 46 | 1 | 0 | 2.359642  | -0.333013 | 1.382241  |
| 47 | 1 | 0 | 3.121934  | 1.183058  | 1.881802  |
| 48 | 1 | 0 | 3.560045  | -0.323152 | 2.683091  |
| 49 | 6 | 0 | -2.641342 | 3.006704  | -1.512351 |
| 50 | 6 | 0 | -3.273296 | 1.966332  | -2.460013 |
| 51 | 1 | 0 | -3.350662 | 0.986518  | -1.980192 |
| 52 | 1 | 0 | -4.280412 | 2.282052  | -2.754823 |
| 53 | 1 | 0 | -2.679689 | 1.848967  | -3.374807 |
| 54 | 6 | 0 | -3.515102 | 3.142561  | -0.251038 |
| 55 | 1 | 0 | -3.574588 | 2.192433  | 0.288897  |
| 56 | 1 | 0 | -3.129491 | 3.901621  | 0.438545  |
| 57 | 1 | 0 | -4.534066 | 3.436260  | -0.527291 |
| 58 | 6 | 0 | -2.561990 | 4.360707  | -2.247431 |
| 59 | 1 | 0 | -1.936856 | 4.290011  | -3.145957 |
| 60 | 1 | 0 | -3.561383 | 4.678791  | -2.564256 |
| 61 | 1 | 0 | -2.153777 | 5.156622  | -1.614406 |
| 62 | 6 | 0 | -2.663183 | -4.594233 | 0.525556  |
| 63 | 1 | 0 | -1.812974 | -4.353417 | 1.165215  |
| 64 | 1 | 0 | -3.380281 | -5.191920 | 1.099546  |
| 65 | 1 | 0 | -2.311300 | -5.200541 | -0.315674 |
| 66 | 6 | 0 | -3.815000 | -2.411204 | 1.155160  |
| 67 | 1 | 0 | -4.231036 | -1.480571 | 0.754683  |
| 68 | 1 | 0 | -4.602054 | -2.916318 | 1.726266  |
| 69 | 1 | 0 | -2.992982 | -2.169726 | 1.830044  |
| 70 | 6 | 0 | -4.532276 | -3.681775 | -0.896419 |
| 71 | 1 | 0 | -5.281922 | -4.247513 | -0.333517 |
| 72 | 1 | 0 | -5.003724 | -2.776613 | -1.291914 |
| 73 | 1 | 0 | -4.196409 | -4.291538 | -1.740584 |

*anti-cis-IM1*

Standard orientation:

| Center<br>Number | Atomic<br>Number | Atomic<br>Type | Coordinates (Angstroms) |           |           |
|------------------|------------------|----------------|-------------------------|-----------|-----------|
|                  |                  |                | X                       | Y         | Z         |
| 1                | 6                | 0              | -2.271852               | 0.006972  | -1.553072 |
| 2                | 8                | 0              | -3.442861               | 0.599937  | -1.953611 |
| 3                | 8                | 0              | -2.282959               | -0.917546 | -0.688516 |
| 4                | 6                | 0              | -1.147602               | 0.575299  | -2.193900 |
| 5                | 6                | 0              | 2.643594                | -0.827470 | -2.315654 |
| 6                | 6                | 0              | 1.295417                | -0.393639 | -2.235726 |
| 7                | 6                | 0              | 0.133404                | 0.006503  | -2.203317 |
| 8                | 1                | 0              | -1.350364               | 1.372709  | -2.903350 |
| 9                | 6                | 0              | -4.749926               | 0.234874  | -1.416087 |
| 10               | 6                | 0              | 3.612517                | -0.054007 | -3.004417 |
| 11               | 6                | 0              | 4.939263                | -0.472360 | -3.084867 |
| 12               | 6                | 0              | 5.350324                | -1.668495 | -2.483679 |
| 13               | 6                | 0              | 4.405031                | -2.446471 | -1.804905 |

|    |   |   |           |           |           |
|----|---|---|-----------|-----------|-----------|
| 14 | 6 | 0 | 3.074278  | -2.039401 | -1.721192 |
| 15 | 1 | 0 | 3.301835  | 0.871622  | -3.479993 |
| 16 | 1 | 0 | 5.658650  | 0.138700  | -3.624404 |
| 17 | 1 | 0 | 6.384881  | -1.992141 | -2.551036 |
| 18 | 1 | 0 | 4.705154  | -3.384917 | -1.344895 |
| 19 | 1 | 0 | 2.346048  | -2.660225 | -1.209934 |
| 20 | 6 | 0 | 1.076495  | -0.872651 | 2.934524  |
| 21 | 6 | 0 | -0.307544 | -1.469917 | 2.520673  |
| 22 | 7 | 0 | 0.985094  | 0.489917  | 2.393643  |
| 23 | 6 | 0 | 0.085797  | 0.455827  | 1.370060  |
| 24 | 7 | 0 | -0.673434 | -0.618368 | 1.365123  |
| 25 | 6 | 0 | 2.083966  | 1.377179  | 1.993281  |
| 26 | 6 | 0 | 1.444553  | 2.237800  | 0.844629  |
| 27 | 7 | 0 | 0.188564  | 1.501953  | 0.553963  |
| 28 | 1 | 0 | 1.914932  | -1.412191 | 2.470032  |
| 29 | 1 | 0 | 1.213789  | -0.867249 | 4.017550  |
| 30 | 1 | 0 | 2.933714  | 0.790131  | 1.618477  |
| 31 | 1 | 0 | 2.425992  | 1.983843  | 2.834136  |
| 32 | 1 | 0 | -1.347564 | -0.826526 | 0.567733  |
| 33 | 1 | 0 | -1.022171 | -1.269541 | 3.332800  |
| 34 | 1 | 0 | 2.081660  | 2.183010  | -0.045120 |
| 35 | 1 | 0 | -0.236757 | 1.458445  | -0.382492 |
| 36 | 6 | 0 | 1.205342  | 3.741056  | 1.163756  |
| 37 | 6 | 0 | 0.332297  | 3.924283  | 2.419404  |
| 38 | 1 | 0 | -0.641122 | 3.438670  | 2.298023  |
| 39 | 1 | 0 | 0.807923  | 3.515298  | 3.317732  |
| 40 | 1 | 0 | 0.153720  | 4.989753  | 2.600699  |
| 41 | 6 | 0 | 0.499776  | 4.386946  | -0.047246 |
| 42 | 1 | 0 | 0.367223  | 5.461264  | 0.120395  |
| 43 | 1 | 0 | 1.086267  | 4.262362  | -0.965215 |
| 44 | 1 | 0 | -0.490720 | 3.952597  | -0.215463 |
| 45 | 6 | 0 | 2.574956  | 4.422702  | 1.363010  |
| 46 | 1 | 0 | 3.213707  | 4.300443  | 0.480156  |
| 47 | 1 | 0 | 2.441474  | 5.496897  | 1.529491  |
| 48 | 1 | 0 | 3.115797  | 4.024576  | 2.228796  |
| 49 | 6 | 0 | -0.360031 | -2.991391 | 2.225600  |
| 50 | 6 | 0 | -1.826594 | -3.383719 | 1.940669  |
| 51 | 1 | 0 | -2.211337 | -2.898878 | 1.038244  |
| 52 | 1 | 0 | -1.902011 | -4.466465 | 1.792501  |
| 53 | 1 | 0 | -2.479089 | -3.116707 | 2.780913  |
| 54 | 6 | 0 | 0.127198  | -3.737313 | 3.485527  |
| 55 | 1 | 0 | -0.466143 | -3.467036 | 4.367657  |
| 56 | 1 | 0 | 0.032277  | -4.818731 | 3.341928  |
| 57 | 1 | 0 | 1.180623  | -3.528665 | 3.705569  |
| 58 | 6 | 0 | 0.510494  | -3.375728 | 1.014662  |
| 59 | 1 | 0 | 0.187435  | -2.855358 | 0.108273  |
| 60 | 1 | 0 | 1.570208  | -3.151591 | 1.178959  |
| 61 | 1 | 0 | 0.430940  | -4.452631 | 0.830835  |
| 62 | 6 | 0 | -5.082023 | -1.227752 | -1.745715 |
| 63 | 1 | 0 | -4.412876 | -1.910478 | -1.220798 |
| 64 | 1 | 0 | -6.116260 | -1.446461 | -1.455826 |
| 65 | 1 | 0 | -4.985752 | -1.401137 | -2.822664 |
| 66 | 6 | 0 | -4.824347 | 0.517385  | 0.091959  |
| 67 | 1 | 0 | -4.526205 | 1.551259  | 0.298299  |
| 68 | 1 | 0 | -5.854933 | 0.385286  | 0.440819  |
| 69 | 1 | 0 | -4.175228 | -0.156767 | 0.652029  |
| 70 | 6 | 0 | -5.696921 | 1.174731  | -2.173636 |
| 71 | 1 | 0 | -6.733570 | 0.995088  | -1.869550 |
| 72 | 1 | 0 | -5.448364 | 2.220578  | -1.966984 |
| 73 | 1 | 0 | -5.615956 | 1.010057  | -3.252465 |

*anti-cis*-TSR

Standard orientation:

| Center<br>Number | Atomic<br>Number | Atomic<br>Type | Coordinates (Angstroms) |           |           |
|------------------|------------------|----------------|-------------------------|-----------|-----------|
|                  |                  |                | X                       | Y         | Z         |
| 1                | 6                | 0              | 2.494024                | -1.560015 | -0.603202 |
| 2                | 8                | 0              | 3.628531                | -2.278149 | -0.302520 |
| 3                | 8                | 0              | 2.501432                | -0.290746 | -0.538726 |
| 4                | 6                | 0              | 1.421829                | -2.398581 | -0.953175 |
| 5                | 6                | 0              | -2.186832               | -1.187245 | -2.296025 |
| 6                | 6                | 0              | -0.907258               | -1.585098 | -1.844640 |
| 7                | 6                | 0              | 0.202360                | -1.938462 | -1.440411 |
| 8                | 1                | 0              | 1.600981                | -3.468006 | -0.921293 |
| 9                | 6                | 0              | 4.887404                | -1.656801 | 0.106617  |
| 10               | 6                | 0              | -3.228073               | -2.133632 | -2.482520 |
| 11               | 6                | 0              | -4.494680               | -1.731288 | -2.899692 |
| 12               | 6                | 0              | -4.776090               | -0.380280 | -3.144006 |
| 13               | 6                | 0              | -3.759206               | 0.565905  | -2.970873 |
| 14               | 6                | 0              | -2.486544               | 0.176299  | -2.555970 |
| 15               | 1                | 0              | -3.018936               | -3.183494 | -2.299788 |
| 16               | 1                | 0              | -5.270769               | -2.479150 | -3.038933 |
| 17               | 1                | 0              | -5.764309               | -0.073502 | -3.473025 |
| 18               | 1                | 0              | -3.956592               | 1.615979  | -3.174404 |
| 19               | 1                | 0              | -1.696938               | 0.912837  | -2.445319 |
| 20               | 6                | 0              | -0.765674               | 3.036354  | 0.999828  |
| 21               | 6                | 0              | 0.740026                | 2.700945  | 0.736973  |
| 22               | 7                | 0              | -1.267682               | 1.763108  | 1.534505  |
| 23               | 6                | 0              | -0.436355               | 0.777666  | 1.086989  |
| 24               | 7                | 0              | 0.717602                | 1.217516  | 0.636700  |
| 25               | 6                | 0              | -2.645375               | 1.253697  | 1.496944  |
| 26               | 6                | 0              | -2.443045               | -0.303485 | 1.469363  |
| 27               | 7                | 0              | -0.990392               | -0.433748 | 1.163496  |
| 28               | 1                | 0              | -1.297978               | 3.295574  | 0.072682  |
| 29               | 1                | 0              | -0.884349               | 3.850387  | 1.717380  |
| 30               | 1                | 0              | -3.156567               | 1.597567  | 0.587144  |
| 31               | 1                | 0              | -3.212410               | 1.587367  | 2.367659  |
| 32               | 1                | 0              | 1.449597                | 0.598600  | 0.154364  |
| 33               | 1                | 0              | 1.314471                | 2.975090  | 1.633700  |
| 34               | 1                | 0              | -3.003445               | -0.727207 | 0.629645  |
| 35               | 1                | 0              | -0.640415               | -1.185656 | 0.568449  |
| 36               | 6                | 0              | -2.852358               | -1.068943 | 2.758999  |
| 37               | 6                | 0              | -2.115844               | -0.526670 | 3.998419  |
| 38               | 1                | 0              | -1.031767               | -0.621032 | 3.882603  |
| 39               | 1                | 0              | -2.349113               | 0.526965  | 4.189113  |
| 40               | 1                | 0              | -2.410152               | -1.094558 | 4.887769  |
| 41               | 6                | 0              | -2.503139               | -2.560501 | 2.567871  |
| 42               | 1                | 0              | -2.827523               | -3.138548 | 3.439866  |
| 43               | 1                | 0              | -3.001555               | -2.976253 | 1.684390  |
| 44               | 1                | 0              | -1.424717               | -2.706915 | 2.453150  |
| 45               | 6                | 0              | -4.378738               | -0.935054 | 2.942857  |
| 46               | 1                | 0              | -4.918443               | -1.306094 | 2.063626  |
| 47               | 1                | 0              | -4.705149               | -1.522372 | 3.807559  |
| 48               | 1                | 0              | -4.686439               | 0.102020  | 3.117365  |
| 49               | 6                | 0              | 1.405772                | 3.398987  | -0.478823 |
| 50               | 6                | 0              | 2.917404                | 3.082313  | -0.462895 |
| 51               | 1                | 0              | 3.105227                | 2.014254  | -0.599937 |
| 52               | 1                | 0              | 3.418317                | 3.619194  | -1.276040 |
| 53               | 1                | 0              | 3.376421                | 3.400890  | 0.480779  |
| 54               | 6                | 0              | 1.208067                | 4.922328  | -0.323623 |
| 55               | 1                | 0              | 1.611080                | 5.282229  | 0.630829  |
| 56               | 1                | 0              | 1.733849                | 5.450594  | -1.125775 |

|    |   |   |           |           |           |
|----|---|---|-----------|-----------|-----------|
| 57 | 1 | 0 | 0.152230  | 5.209871  | -0.379629 |
| 58 | 6 | 0 | 0.805970  | 2.915737  | -1.814168 |
| 59 | 1 | 0 | 0.963426  | 1.842291  | -1.952872 |
| 60 | 1 | 0 | -0.267643 | 3.121456  | -1.883859 |
| 61 | 1 | 0 | 1.290404  | 3.437081  | -2.646627 |
| 62 | 6 | 0 | 5.446937  | -0.780350 | -1.023374 |
| 63 | 1 | 0 | 4.786913  | 0.064635  | -1.221010 |
| 64 | 1 | 0 | 6.438744  | -0.405342 | -0.746228 |
| 65 | 1 | 0 | 5.546506  | -1.370358 | -1.940387 |
| 66 | 6 | 0 | 4.714853  | -0.872120 | 1.416016  |
| 67 | 1 | 0 | 4.273752  | -1.515534 | 2.184869  |
| 68 | 1 | 0 | 5.693231  | -0.532129 | 1.774037  |
| 69 | 1 | 0 | 4.069930  | -0.005600 | 1.268284  |
| 70 | 6 | 0 | 5.797423  | -2.870554 | 0.335989  |
| 71 | 1 | 0 | 6.796841  | -2.543500 | 0.641053  |
| 72 | 1 | 0 | 5.384438  | -3.515232 | 1.117750  |
| 73 | 1 | 0 | 5.885296  | -3.458279 | -0.582674 |

*anti-cis-IM2*

Standard orientation:

| Center<br>Number | Atomic<br>Number | Atomic<br>Type | Coordinates (Angstroms) |           |           |
|------------------|------------------|----------------|-------------------------|-----------|-----------|
|                  |                  |                | X                       | Y         | Z         |
| 1                | 6                | 0              | 2.456884                | -1.778799 | -0.143989 |
| 2                | 8                | 0              | 3.607439                | -2.386725 | 0.291619  |
| 3                | 8                | 0              | 2.442623                | -0.537708 | -0.393314 |
| 4                | 6                | 0              | 1.388085                | -2.691114 | -0.248945 |
| 5                | 6                | 0              | -2.206293               | -1.850486 | -1.881055 |
| 6                | 6                | 0              | -0.974648               | -2.118368 | -1.231071 |
| 7                | 6                | 0              | 0.152881                | -2.366483 | -0.789757 |
| 8                | 1                | 0              | 1.573511                | -3.714975 | 0.058240  |
| 9                | 6                | 0              | 4.865607                | -1.677512 | 0.490119  |
| 10               | 6                | 0              | -3.253181               | -2.808143 | -1.892981 |
| 11               | 6                | 0              | -4.469713               | -2.532211 | -2.513307 |
| 12               | 6                | 0              | -4.694186               | -1.297745 | -3.136678 |
| 13               | 6                | 0              | -3.670315               | -0.342743 | -3.137150 |
| 14               | 6                | 0              | -2.446541               | -0.608363 | -2.524094 |
| 15               | 1                | 0              | -3.088744               | -3.768911 | -1.414379 |
| 16               | 1                | 0              | -5.250538               | -3.288699 | -2.512582 |
| 17               | 1                | 0              | -5.643739               | -1.088796 | -3.620481 |
| 18               | 1                | 0              | -3.822016               | 0.613892  | -3.631685 |
| 19               | 1                | 0              | -1.649895               | 0.129382  | -2.553315 |
| 20               | 6                | 0              | -0.535408               | 3.327228  | 0.458190  |
| 21               | 6                | 0              | 0.863802                | 2.741970  | 0.082513  |
| 22               | 7                | 0              | -1.154983               | 2.196699  | 1.153111  |
| 23               | 6                | 0              | -0.535514               | 1.061513  | 0.726135  |
| 24               | 7                | 0              | 0.601068                | 1.281275  | 0.095211  |
| 25               | 6                | 0              | -2.578427               | 1.902118  | 1.337452  |
| 26               | 6                | 0              | -2.591922               | 0.338064  | 1.474242  |
| 27               | 7                | 0              | -1.238180               | -0.037120 | 0.992735  |
| 28               | 1                | 0              | -1.120324               | 3.595142  | -0.434173 |
| 29               | 1                | 0              | -0.455892               | 4.204528  | 1.103296  |
| 30               | 1                | 0              | -3.158563               | 2.229695  | 0.462813  |
| 31               | 1                | 0              | -2.973303               | 2.405258  | 2.222294  |
| 32               | 1                | 0              | 1.305285                | 0.512319  | -0.135343 |
| 33               | 1                | 0              | 1.566783                | 2.974000  | 0.896111  |
| 34               | 1                | 0              | -3.325827               | -0.083091 | 0.778651  |
| 35               | 1                | 0              | -1.059655               | -0.904264 | 0.466300  |
| 36               | 6                | 0              | 1.491597                | 3.263776  | -1.239057 |
| 37               | 6                | 0              | 0.678518                | 2.827957  | -2.473313 |

|    |   |   |           |           |           |
|----|---|---|-----------|-----------|-----------|
| 38 | 1 | 0 | -0.346359 | 3.216407  | -2.457553 |
| 39 | 1 | 0 | 1.154571  | 3.209931  | -3.382619 |
| 40 | 1 | 0 | 0.630193  | 1.738106  | -2.553112 |
| 41 | 6 | 0 | 2.928480  | 2.712996  | -1.355925 |
| 42 | 1 | 0 | 3.401789  | 3.094224  | -2.267490 |
| 43 | 1 | 0 | 3.541866  | 3.031827  | -0.504438 |
| 44 | 1 | 0 | 2.947080  | 1.620453  | -1.395992 |
| 45 | 6 | 0 | 1.552099  | 4.804380  | -1.164095 |
| 46 | 1 | 0 | 2.099002  | 5.141049  | -0.274910 |
| 47 | 1 | 0 | 2.073525  | 5.201202  | -2.041432 |
| 48 | 1 | 0 | 0.555004  | 5.259335  | -1.144158 |
| 49 | 6 | 0 | -2.908052 | -0.224507 | 2.890380  |
| 50 | 6 | 0 | -2.792997 | -1.762112 | 2.836167  |
| 51 | 1 | 0 | -1.772755 | -2.082216 | 2.603680  |
| 52 | 1 | 0 | -3.065216 | -2.195052 | 3.804811  |
| 53 | 1 | 0 | -3.463561 | -2.186220 | 2.079641  |
| 54 | 6 | 0 | -4.358938 | 0.152242  | 3.254006  |
| 55 | 1 | 0 | -5.068046 | -0.225764 | 2.507881  |
| 56 | 1 | 0 | -4.630026 | -0.286201 | 4.220186  |
| 57 | 1 | 0 | -4.501291 | 1.235605  | 3.337897  |
| 58 | 6 | 0 | -1.933356 | 0.323261  | 3.949908  |
| 59 | 1 | 0 | -0.898679 | 0.062714  | 3.706070  |
| 60 | 1 | 0 | -1.997141 | 1.412628  | 4.048772  |
| 61 | 1 | 0 | -2.163495 | -0.107736 | 4.930216  |
| 62 | 6 | 0 | 5.804481  | -2.789228 | 0.977389  |
| 63 | 1 | 0 | 6.804601  | -2.385737 | 1.167681  |
| 64 | 1 | 0 | 5.424783  | -3.233841 | 1.902698  |
| 65 | 1 | 0 | 5.883901  | -3.580400 | 0.225459  |
| 66 | 6 | 0 | 5.378162  | -1.100750 | -0.837656 |
| 67 | 1 | 0 | 5.431067  | -1.890693 | -1.594214 |
| 68 | 1 | 0 | 4.721298  | -0.311314 | -1.204275 |
| 69 | 1 | 0 | 6.385573  | -0.691272 | -0.699499 |
| 70 | 6 | 0 | 4.723942  | -0.597922 | 1.573443  |
| 71 | 1 | 0 | 4.314558  | -1.035240 | 2.490575  |
| 72 | 1 | 0 | 5.709083  | -0.177737 | 1.806783  |
| 73 | 1 | 0 | 4.065463  | 0.205840  | 1.242514  |

*anti-cis*-TS2

Standard orientation:

| Center Number | Atomic Number | Atomic Type | Coordinates (Angstroms) |           |           |
|---------------|---------------|-------------|-------------------------|-----------|-----------|
|               |               |             | X                       | Y         | Z         |
| 1             | 6             | 0           | -1.007316               | -3.195148 | 1.284898  |
| 2             | 6             | 0           | 0.392622                | -2.511541 | 1.375336  |
| 3             | 7             | 0           | -1.579639               | -2.545880 | 0.108000  |
| 4             | 6             | 0           | -0.974940               | -1.326619 | -0.046636 |
| 5             | 7             | 0           | 0.152430                | -1.233405 | 0.667842  |
| 6             | 6             | 0           | -2.985988               | -2.386424 | -0.259786 |
| 7             | 6             | 0           | -2.944206               | -1.090685 | -1.148526 |
| 8             | 7             | 0           | -1.644005               | -0.473542 | -0.791523 |
| 9             | 1             | 0           | -1.618254               | -2.990985 | 2.177581  |
| 10            | 1             | 0           | -0.929172               | -4.276992 | 1.155243  |
| 11            | 6             | 0           | 0.975544                | -2.343875 | 2.806196  |
| 12            | 1             | 0           | -3.610277               | -2.238843 | 0.635090  |
| 13            | 1             | 0           | -3.357999               | -3.261915 | -0.796818 |
| 14            | 6             | 0           | -3.112429               | -1.310298 | -2.682266 |
| 15            | 1             | 0           | 0.897452                | -0.549483 | 0.454882  |
| 16            | 6             | 0           | -2.053614               | -2.282199 | -3.236251 |
| 17            | 6             | 0           | -2.967724               | 0.056553  | -3.382918 |
| 18            | 6             | 0           | -4.528109               | -1.859544 | -2.954551 |

|    |   |   |           |           |           |
|----|---|---|-----------|-----------|-----------|
| 19 | 6 | 0 | 0.127049  | -1.387324 | 3.666223  |
| 20 | 6 | 0 | 2.410240  | -1.786017 | 2.694364  |
| 21 | 6 | 0 | 1.032688  | -3.737286 | 3.467781  |
| 22 | 1 | 0 | -2.176385 | -2.394391 | -4.319265 |
| 23 | 1 | 0 | -1.042011 | -1.907701 | -3.051807 |
| 24 | 1 | 0 | -2.135334 | -3.280050 | -2.790820 |
| 25 | 1 | 0 | -3.115071 | -0.053980 | -4.463093 |
| 26 | 1 | 0 | -3.712634 | 0.772775  | -3.015928 |
| 27 | 1 | 0 | -1.976877 | 0.489048  | -3.217356 |
| 28 | 1 | 0 | -4.695974 | -1.955244 | -4.032805 |
| 29 | 1 | 0 | -4.685131 | -2.850561 | -2.513254 |
| 30 | 1 | 0 | -5.299329 | -1.187352 | -2.558799 |
| 31 | 1 | 0 | 0.582402  | -1.278272 | 4.656496  |
| 32 | 1 | 0 | 0.063013  | -0.394227 | 3.212460  |
| 33 | 1 | 0 | -0.893242 | -1.757277 | 3.818243  |
| 34 | 1 | 0 | 2.853369  | -1.687424 | 3.691578  |
| 35 | 1 | 0 | 3.050262  | -2.458211 | 2.110168  |
| 36 | 1 | 0 | 2.433369  | -0.803164 | 2.215757  |
| 37 | 1 | 0 | 1.520154  | -3.669590 | 4.446262  |
| 38 | 1 | 0 | 0.034181  | -4.159762 | 3.628749  |
| 39 | 1 | 0 | 1.608882  | -4.445956 | 2.860151  |
| 40 | 6 | 0 | 2.509371  | 1.201219  | -0.921895 |
| 41 | 8 | 0 | 3.686039  | 1.387669  | -1.576824 |
| 42 | 8 | 0 | 2.387298  | 0.384221  | 0.007490  |
| 43 | 6 | 0 | 1.468491  | 2.041867  | -1.468654 |
| 44 | 6 | 0 | -1.639951 | 2.910818  | 0.594920  |
| 45 | 6 | 0 | -0.906399 | 2.079842  | -0.360956 |
| 46 | 6 | 0 | 0.259399  | 2.147041  | -0.877117 |
| 47 | 1 | 0 | 1.700643  | 2.598238  | -2.372352 |
| 48 | 6 | 0 | 4.905757  | 0.635879  | -1.261689 |
| 49 | 6 | 0 | 5.914826  | 1.198401  | -2.269281 |
| 50 | 6 | 0 | 4.690447  | -0.864186 | -1.503766 |
| 51 | 6 | 0 | 5.359691  | 0.933944  | 0.173257  |
| 52 | 6 | 0 | -1.420450 | 4.301848  | 0.691632  |
| 53 | 6 | 0 | -2.145448 | 5.083509  | 1.590935  |
| 54 | 6 | 0 | -3.106910 | 4.499775  | 2.424342  |
| 55 | 6 | 0 | -3.338386 | 3.123607  | 2.340797  |
| 56 | 6 | 0 | -2.621261 | 2.342952  | 1.431667  |
| 57 | 1 | 0 | 6.888871  | 0.716045  | -2.136907 |
| 58 | 1 | 0 | 5.574546  | 1.022250  | -3.294440 |
| 59 | 1 | 0 | 6.037634  | 2.276616  | -2.128675 |
| 60 | 1 | 0 | 5.645606  | -1.391716 | -1.402525 |
| 61 | 1 | 0 | 3.980412  | -1.281921 | -0.789011 |
| 62 | 1 | 0 | 4.314089  | -1.034828 | -2.518044 |
| 63 | 1 | 0 | 6.337884  | 0.473154  | 0.351516  |
| 64 | 1 | 0 | 5.460147  | 2.014173  | 0.321763  |
| 65 | 1 | 0 | 4.647671  | 0.544549  | 0.901916  |
| 66 | 1 | 0 | -0.675676 | 4.760390  | 0.047535  |
| 67 | 1 | 0 | -1.957838 | 6.152980  | 1.644533  |
| 68 | 1 | 0 | -3.669526 | 5.110059  | 3.125232  |
| 69 | 1 | 0 | -4.083458 | 2.657389  | 2.980609  |
| 70 | 1 | 0 | -2.812506 | 1.275138  | 1.368908  |
| 71 | 1 | 0 | -1.397283 | 0.702869  | -0.705309 |
| 72 | 1 | 0 | 1.110535  | -3.111286 | 0.795372  |
| 73 | 1 | 0 | -3.743300 | -0.406542 | -0.836730 |

-----  
*anti-cis*-IM3

Standard orientation:

-----  
 Center Atomic Atomic Coordinates (Angstroms)  
 Number Number Type X Y Z



|    |   |   |           |           |           |
|----|---|---|-----------|-----------|-----------|
| 1  | 6 | 0 | -2.263261 | -1.869515 | 2.261190  |
| 2  | 6 | 0 | -0.739230 | -1.554126 | 2.226122  |
| 3  | 7 | 0 | -2.630302 | -1.648018 | 0.872182  |
| 4  | 6 | 0 | -1.774531 | -0.695163 | 0.330117  |
| 5  | 7 | 0 | -0.657832 | -0.579667 | 1.120500  |
| 6  | 6 | 0 | -3.946268 | -1.360257 | 0.318099  |
| 7  | 6 | 0 | -3.553271 | -0.556578 | -0.977878 |
| 8  | 7 | 0 | -2.181539 | -0.053426 | -0.714374 |
| 9  | 1 | 0 | -2.804145 | -1.183969 | 2.934888  |
| 10 | 1 | 0 | -2.461553 | -2.896311 | 2.580482  |
| 11 | 1 | 0 | -4.538654 | -0.734011 | 1.006437  |
| 12 | 1 | 0 | -4.510299 | -2.275700 | 0.119004  |
| 13 | 1 | 0 | 0.242650  | -0.375912 | 0.693618  |
| 14 | 1 | 0 | -0.207578 | -2.478992 | 1.948090  |
| 15 | 1 | 0 | -4.220667 | 0.309856  | -1.079245 |
| 16 | 6 | 0 | 2.702640  | -0.264788 | -1.138597 |
| 17 | 8 | 0 | 3.772525  | -0.837313 | -1.722664 |
| 18 | 8 | 0 | 2.275849  | -0.548776 | -0.026867 |
| 19 | 6 | 0 | 2.110208  | 0.749875  | -2.048055 |
| 20 | 6 | 0 | 0.145293  | 3.552869  | -0.575248 |
| 21 | 6 | 0 | 0.103710  | 2.227000  | -1.219873 |
| 22 | 6 | 0 | 1.122487  | 1.524291  | -1.649734 |
| 23 | 1 | 0 | 2.518021  | 0.809835  | -3.054835 |
| 24 | 6 | 0 | 4.553562  | -1.914940 | -1.075682 |
| 25 | 6 | 0 | 1.336557  | 4.286802  | -0.425780 |
| 26 | 6 | 0 | 1.325479  | 5.536793  | 0.190312  |
| 27 | 6 | 0 | 0.125877  | 6.078966  | 0.668483  |
| 28 | 6 | 0 | -1.062815 | 5.358803  | 0.523991  |
| 29 | 6 | 0 | -1.053466 | 4.106229  | -0.093726 |
| 30 | 1 | 0 | 2.269792  | 3.872826  | -0.797791 |
| 31 | 1 | 0 | 2.253240  | 6.092238  | 0.297172  |
| 32 | 1 | 0 | 0.120170  | 7.054321  | 1.146705  |
| 33 | 1 | 0 | -1.998437 | 5.771178  | 0.891445  |
| 34 | 1 | 0 | -1.976196 | 3.543036  | -0.202646 |
| 35 | 1 | 0 | -0.873240 | 1.737257  | -1.311538 |
| 36 | 6 | 0 | -0.115084 | -1.051354 | 3.558052  |
| 37 | 6 | 0 | 1.403245  | -0.867770 | 3.352127  |
| 38 | 1 | 0 | 1.622381  | -0.082958 | 2.622337  |
| 39 | 1 | 0 | 1.883157  | -0.590371 | 4.297749  |
| 40 | 1 | 0 | 1.870533  | -1.793125 | 2.995103  |
| 41 | 6 | 0 | -0.722087 | 0.288702  | 4.017305  |
| 42 | 1 | 0 | -1.783892 | 0.197502  | 4.271048  |
| 43 | 1 | 0 | -0.202236 | 0.644168  | 4.914251  |
| 44 | 1 | 0 | -0.624370 | 1.051230  | 3.239294  |
| 45 | 6 | 0 | -0.344686 | -2.128314 | 4.639046  |
| 46 | 1 | 0 | 0.074197  | -3.095751 | 4.335313  |
| 47 | 1 | 0 | 0.141922  | -1.835854 | 5.576141  |
| 48 | 1 | 0 | -1.409790 | -2.272092 | 4.853410  |
| 49 | 6 | 0 | -3.670789 | -1.346027 | -2.320860 |
| 50 | 6 | 0 | -5.151182 | -1.697111 | -2.578252 |
| 51 | 1 | 0 | -5.262369 | -2.192748 | -3.549720 |
| 52 | 1 | 0 | -5.557228 | -2.375538 | -1.819329 |
| 53 | 1 | 0 | -5.776077 | -0.795302 | -2.592557 |
| 54 | 6 | 0 | -3.177788 | -0.433690 | -3.462945 |
| 55 | 1 | 0 | -3.280775 | -0.940521 | -4.430088 |
| 56 | 1 | 0 | -3.761980 | 0.493946  | -3.507348 |
| 57 | 1 | 0 | -2.128562 | -0.163036 | -3.320471 |
| 58 | 6 | 0 | -2.825476 | -2.633733 | -2.303627 |
| 59 | 1 | 0 | -1.771721 | -2.405554 | -2.115562 |
| 60 | 1 | 0 | -3.162890 | -3.336087 | -1.533685 |
| 61 | 1 | 0 | -2.893890 | -3.144048 | -3.271790 |

|    |   |   |          |           |           |
|----|---|---|----------|-----------|-----------|
| 62 | 6 | 0 | 5.625705 | -2.220771 | -2.124848 |
| 63 | 1 | 0 | 6.286339 | -3.015622 | -1.763979 |
| 64 | 1 | 0 | 5.167079 | -2.549302 | -3.062401 |
| 65 | 1 | 0 | 6.230984 | -1.332349 | -2.328919 |
| 66 | 6 | 0 | 5.189622 | -1.395450 | 0.218363  |
| 67 | 1 | 0 | 5.779751 | -0.494848 | 0.019781  |
| 68 | 1 | 0 | 4.433367 | -1.164321 | 0.969769  |
| 69 | 1 | 0 | 5.862832 | -2.159580 | 0.621937  |
| 70 | 6 | 0 | 3.658097 | -3.136435 | -0.839774 |
| 71 | 1 | 0 | 3.175734 | -3.442864 | -1.773599 |
| 72 | 1 | 0 | 4.271581 | -3.971580 | -0.484814 |
| 73 | 1 | 0 | 2.888257 | -2.928386 | -0.095538 |

*anti-trans*-COM

Standard orientation:

| Center Number | Atomic Number | Atomic Type | Coordinates (Angstroms) |           |           |
|---------------|---------------|-------------|-------------------------|-----------|-----------|
|               |               |             | X                       | Y         | Z         |
| 1             | 6             | 0           | -0.716407               | -1.682184 | 0.272254  |
| 2             | 8             | 0           | -1.693329               | -1.904275 | 1.147410  |
| 3             | 8             | 0           | 0.401122                | -2.181614 | 0.320444  |
| 4             | 6             | 0           | -1.097827               | -0.691980 | -0.824439 |
| 5             | 6             | 0           | -5.051966               | 0.321118  | -1.234844 |
| 6             | 6             | 0           | -3.675366               | -0.040859 | -1.089755 |
| 7             | 6             | 0           | -2.509009               | -0.347217 | -0.951394 |
| 8             | 1             | 0           | -0.715298               | -1.111268 | -1.762945 |
| 9             | 1             | 0           | -0.484487               | 0.209171  | -0.636545 |
| 10            | 6             | 0           | -1.535288               | -2.797556 | 2.323237  |
| 11            | 6             | 0           | -5.581457               | 1.421442  | -0.529701 |
| 12            | 6             | 0           | -6.923889               | 1.772137  | -0.671156 |
| 13            | 6             | 0           | -7.761108               | 1.036296  | -1.516356 |
| 14            | 6             | 0           | -7.245663               | -0.056473 | -2.221251 |
| 15            | 6             | 0           | -5.904303               | -0.413580 | -2.084299 |
| 16            | 1             | 0           | -4.929691               | 1.991722  | 0.124690  |
| 17            | 1             | 0           | -7.317436               | 2.622336  | -0.120960 |
| 18            | 1             | 0           | -8.806083               | 1.312289  | -1.625110 |
| 19            | 1             | 0           | -7.889994               | -0.632100 | -2.880007 |
| 20            | 1             | 0           | -5.502815               | -1.261130 | -2.631078 |
| 21            | 6             | 0           | 3.303706                | 2.931550  | -0.402131 |
| 22            | 6             | 0           | 1.757093                | 2.935158  | -0.094691 |
| 23            | 7             | 0           | 3.632654                | 1.533384  | -0.153439 |
| 24            | 6             | 0           | 2.435090                | 0.839686  | -0.286045 |
| 25            | 7             | 0           | 1.337143                | 1.515765  | -0.222243 |
| 26            | 6             | 0           | 4.698002                | 0.730737  | -0.736342 |
| 27            | 6             | 0           | 4.151132                | -0.707498 | -0.495055 |
| 28            | 7             | 0           | 2.697617                | -0.477647 | -0.549524 |
| 29            | 1             | 0           | 3.883568                | 3.603246  | 0.236767  |
| 30            | 1             | 0           | 3.496075                | 3.203833  | -1.453405 |
| 31            | 1             | 0           | 5.656502                | 0.893975  | -0.236404 |
| 32            | 1             | 0           | 4.822288                | 0.942736  | -1.811687 |
| 33            | 1             | 0           | 2.022221                | -1.184792 | -0.267428 |
| 34            | 1             | 0           | 1.239543                | 3.513873  | -0.871265 |
| 35            | 1             | 0           | 4.446986                | -1.011276 | 0.523447  |
| 36            | 6             | 0           | -2.908573               | -2.700814 | 2.991664  |
| 37            | 1             | 0           | -3.694618               | -3.039175 | 2.310315  |
| 38            | 1             | 0           | -2.930641               | -3.326926 | 3.889316  |
| 39            | 1             | 0           | -3.125600               | -1.668356 | 3.280917  |
| 40            | 6             | 0           | -0.437956               | -2.255208 | 3.244177  |
| 41            | 1             | 0           | -0.427111               | -2.838359 | 4.171322  |
| 42            | 1             | 0           | 0.546088                | -2.323440 | 2.778397  |

|    |   |   |           |           |           |
|----|---|---|-----------|-----------|-----------|
| 43 | 1 | 0 | -0.637242 | -1.210439 | 3.502948  |
| 44 | 6 | 0 | -1.254604 | -4.227600 | 1.850675  |
| 45 | 1 | 0 | -1.268754 | -4.901338 | 2.714122  |
| 46 | 1 | 0 | -2.029184 | -4.557474 | 1.150826  |
| 47 | 1 | 0 | -0.280580 | -4.304196 | 1.365155  |
| 48 | 6 | 0 | 4.648422  | -1.816360 | -1.462404 |
| 49 | 6 | 0 | 4.055801  | -3.165484 | -1.000649 |
| 50 | 1 | 0 | 2.962632  | -3.173403 | -1.063963 |
| 51 | 1 | 0 | 4.429473  | -3.981745 | -1.629218 |
| 52 | 1 | 0 | 4.336001  | -3.387451 | 0.036347  |
| 53 | 6 | 0 | 6.186621  | -1.889966 | -1.371777 |
| 54 | 1 | 0 | 6.519534  | -2.052262 | -0.339220 |
| 55 | 1 | 0 | 6.564803  | -2.721482 | -1.976719 |
| 56 | 1 | 0 | 6.660557  | -0.973220 | -1.740375 |
| 57 | 6 | 0 | 4.222179  | -1.552988 | -2.919620 |
| 58 | 1 | 0 | 4.535907  | -2.387273 | -3.557318 |
| 59 | 1 | 0 | 3.136194  | -1.449601 | -2.999402 |
| 60 | 1 | 0 | 4.677619  | -0.643211 | -3.325160 |
| 61 | 6 | 0 | 1.343378  | 3.578043  | 1.267155  |
| 62 | 6 | 0 | -0.185145 | 3.439243  | 1.422376  |
| 63 | 1 | 0 | -0.481703 | 2.387568  | 1.440625  |
| 64 | 1 | 0 | -0.520288 | 3.914281  | 2.352357  |
| 65 | 1 | 0 | -0.712760 | 3.921275  | 0.590120  |
| 66 | 6 | 0 | 1.700136  | 5.079031  | 1.252542  |
| 67 | 1 | 0 | 1.226252  | 5.590995  | 0.405678  |
| 68 | 1 | 0 | 1.349318  | 5.563968  | 2.170956  |
| 69 | 1 | 0 | 2.780605  | 5.249501  | 1.186984  |
| 70 | 6 | 0 | 2.037200  | 2.888450  | 2.457152  |
| 71 | 1 | 0 | 1.807909  | 1.818373  | 2.473890  |
| 72 | 1 | 0 | 3.126244  | 3.000728  | 2.418019  |
| 73 | 1 | 0 | 1.692528  | 3.323908  | 3.402681  |

*anti-trans-TS1*

Standard orientation:

| Center Number | Atomic Number | Atomic Type | Coordinates (Angstroms) |           |           |
|---------------|---------------|-------------|-------------------------|-----------|-----------|
|               |               |             | X                       | Y         | Z         |
| 1             | 6             | 0           | 0.149912                | 1.948144  | -0.212430 |
| 2             | 8             | 0           | 1.083024                | 2.516872  | 0.580020  |
| 3             | 8             | 0           | -1.037926               | 2.331297  | -0.228990 |
| 4             | 6             | 0           | 0.626831                | 0.799902  | -0.970361 |
| 5             | 6             | 0           | 4.554830                | -0.229705 | -1.252828 |
| 6             | 6             | 0           | 3.185408                | 0.150820  | -1.160233 |
| 7             | 6             | 0           | 2.017510                | 0.497693  | -1.075187 |
| 8             | 1             | 0           | 0.066770                | 0.690830  | -1.902230 |
| 9             | 6             | 0           | 0.791597                | 3.635695  | 1.488158  |
| 10            | 6             | 0           | 5.489521                | 0.184499  | -0.276728 |
| 11            | 6             | 0           | 6.829161                | -0.190680 | -0.368720 |
| 12            | 6             | 0           | 7.274010                | -0.986063 | -1.430851 |
| 13            | 6             | 0           | 6.359233                | -1.402194 | -2.404572 |
| 14            | 6             | 0           | 5.017671                | -1.031078 | -2.321045 |
| 15            | 1             | 0           | 5.147756                | 0.802531  | 0.547774  |
| 16            | 1             | 0           | 7.530563                | 0.140189  | 0.392893  |
| 17            | 1             | 0           | 8.318560                | -1.276245 | -1.499413 |
| 18            | 1             | 0           | 6.693096                | -2.018123 | -3.235670 |
| 19            | 1             | 0           | 4.312037                | -1.353103 | -3.080962 |
| 20            | 1             | 0           | -0.016404               | -0.305109 | -0.235915 |
| 21            | 6             | 0           | -2.017791               | -3.207858 | 0.179322  |
| 22            | 6             | 0           | -0.586860               | -2.614176 | 0.460348  |
| 23            | 7             | 0           | -2.873886               | -2.026643 | 0.316942  |

|    |   |   |           |           |           |
|----|---|---|-----------|-----------|-----------|
| 24 | 6 | 0 | -2.063574 | -0.935205 | 0.133412  |
| 25 | 7 | 0 | -0.777787 | -1.152100 | 0.275095  |
| 26 | 6 | 0 | -4.152029 | -1.747428 | -0.341176 |
| 27 | 6 | 0 | -4.194035 | -0.185992 | -0.303318 |
| 28 | 7 | 0 | -2.758006 | 0.143206  | -0.238997 |
| 29 | 1 | 0 | -2.303569 | -3.991366 | 0.884307  |
| 30 | 1 | 0 | -2.083927 | -3.618095 | -0.840184 |
| 31 | 1 | 0 | -4.991927 | -2.193585 | 0.195894  |
| 32 | 1 | 0 | -4.149657 | -2.128486 | -1.374138 |
| 33 | 1 | 0 | -2.312608 | 1.073404  | -0.286075 |
| 34 | 1 | 0 | 0.110638  | -2.966397 | -0.309223 |
| 35 | 1 | 0 | -4.676954 | 0.121730  | 0.637260  |
| 36 | 6 | 0 | -4.950090 | 0.522160  | -1.459401 |
| 37 | 6 | 0 | -4.939307 | 2.042266  | -1.186758 |
| 38 | 1 | 0 | -3.924646 | 2.453637  | -1.198153 |
| 39 | 1 | 0 | -5.516176 | 2.568518  | -1.955066 |
| 40 | 1 | 0 | -5.389619 | 2.274570  | -0.214222 |
| 41 | 6 | 0 | -6.409357 | 0.021154  | -1.458229 |
| 42 | 1 | 0 | -6.889160 | 0.183940  | -0.485438 |
| 43 | 1 | 0 | -6.995153 | 0.560478  | -2.210206 |
| 44 | 1 | 0 | -6.476372 | -1.046806 | -1.695709 |
| 45 | 6 | 0 | -4.303693 | 0.252060  | -2.832052 |
| 46 | 1 | 0 | -3.262332 | 0.586541  | -2.855525 |
| 47 | 1 | 0 | -4.325552 | -0.809644 | -3.100878 |
| 48 | 1 | 0 | -4.849209 | 0.795268  | -3.611326 |
| 49 | 6 | 0 | 0.041666  | -2.975720 | 1.839465  |
| 50 | 6 | 0 | 0.292612  | -4.497317 | 1.889329  |
| 51 | 1 | 0 | 0.797542  | -4.766664 | 2.823415  |
| 52 | 1 | 0 | -0.636933 | -5.076374 | 1.844863  |
| 53 | 1 | 0 | 0.934515  | -4.822498 | 1.061584  |
| 54 | 6 | 0 | -0.870514 | -2.554188 | 3.007138  |
| 55 | 1 | 0 | -1.064214 | -1.477121 | 2.984706  |
| 56 | 1 | 0 | -1.834678 | -3.074639 | 2.988660  |
| 57 | 1 | 0 | -0.389340 | -2.787814 | 3.963510  |
| 58 | 6 | 0 | 1.395487  | -2.246148 | 1.959526  |
| 59 | 1 | 0 | 1.888528  | -2.516339 | 2.900221  |
| 60 | 1 | 0 | 2.070113  | -2.513822 | 1.138367  |
| 61 | 1 | 0 | 1.268750  | -1.160131 | 1.942084  |
| 62 | 6 | 0 | 0.335577  | 4.862310  | 0.687776  |
| 63 | 1 | 0 | -0.630082 | 4.686375  | 0.211852  |
| 64 | 1 | 0 | 0.249089  | 5.725038  | 1.357878  |
| 65 | 1 | 0 | 1.072446  | 5.104214  | -0.085182 |
| 66 | 6 | 0 | 2.153890  | 3.896313  | 2.139886  |
| 67 | 1 | 0 | 2.079812  | 4.728736  | 2.847437  |
| 68 | 1 | 0 | 2.499065  | 3.008814  | 2.679146  |
| 69 | 1 | 0 | 2.900323  | 4.147677  | 1.380546  |
| 70 | 6 | 0 | -0.237365 | 3.217169  | 2.546458  |
| 71 | 1 | 0 | 0.089441  | 2.302863  | 3.053139  |
| 72 | 1 | 0 | -0.328290 | 4.007965  | 3.299628  |
| 73 | 1 | 0 | -1.217075 | 3.043875  | 2.099260  |

*anti-trans-IM1*

Standard orientation:

| Center<br>Number | Atomic<br>Number | Atomic<br>Type | Coordinates (Angstroms) |          |           |
|------------------|------------------|----------------|-------------------------|----------|-----------|
|                  |                  |                | X                       | Y        | Z         |
| 1                | 6                | 0              | 0.023775                | 2.023123 | -0.268533 |
| 2                | 8                | 0              | 0.878562                | 2.653088 | 0.584399  |
| 3                | 8                | 0              | -1.224067               | 2.277446 | -0.246654 |
| 4                | 6                | 0              | 0.622751                | 1.068387 | -1.118179 |

|    |   |   |           |           |           |
|----|---|---|-----------|-----------|-----------|
| 5  | 6 | 0 | 4.530340  | 0.009206  | -1.208755 |
| 6  | 6 | 0 | 3.163960  | 0.391259  | -1.179472 |
| 7  | 6 | 0 | 1.990277  | 0.745872  | -1.147489 |
| 8  | 1 | 0 | -0.001749 | 0.731200  | -1.942590 |
| 9  | 6 | 0 | 0.451196  | 3.668204  | 1.545395  |
| 10 | 6 | 0 | 5.030660  | -0.851918 | -2.215343 |
| 11 | 6 | 0 | 6.373601  | -1.225187 | -2.234910 |
| 12 | 6 | 0 | 7.259685  | -0.754576 | -1.258657 |
| 13 | 6 | 0 | 6.779975  | 0.099954  | -0.258591 |
| 14 | 6 | 0 | 5.439083  | 0.478426  | -0.229107 |
| 15 | 1 | 0 | 4.350901  | -1.215879 | -2.980203 |
| 16 | 1 | 0 | 6.732499  | -1.885623 | -3.020507 |
| 17 | 1 | 0 | 8.305870  | -1.046149 | -1.278468 |
| 18 | 1 | 0 | 7.457117  | 0.476190  | 0.504263  |
| 19 | 1 | 0 | 5.073899  | 1.143678  | 0.547334  |
| 20 | 6 | 0 | -1.939544 | -3.327611 | 0.121128  |
| 21 | 6 | 0 | -0.476205 | -2.796605 | 0.342521  |
| 22 | 7 | 0 | -2.753611 | -2.120020 | 0.291648  |
| 23 | 6 | 0 | -1.946362 | -1.040540 | 0.089654  |
| 24 | 7 | 0 | -0.655513 | -1.330204 | 0.211783  |
| 25 | 6 | 0 | -4.060718 | -1.801084 | -0.292771 |
| 26 | 6 | 0 | -4.046170 | -0.237425 | -0.263880 |
| 27 | 7 | 0 | -2.594713 | 0.056909  | -0.243664 |
| 28 | 1 | 0 | -2.220469 | -4.098624 | 0.840923  |
| 29 | 1 | 0 | -2.062677 | -3.737449 | -0.892260 |
| 30 | 1 | 0 | -4.879401 | -2.216967 | 0.297865  |
| 31 | 1 | 0 | -4.129298 | -2.192234 | -1.318951 |
| 32 | 1 | 0 | -2.109779 | 1.017327  | -0.294351 |
| 33 | 1 | 0 | -4.482807 | 0.093508  | 0.690224  |
| 34 | 1 | 0 | 0.165203  | -3.139575 | -0.477218 |
| 35 | 1 | 0 | 0.049169  | -0.645583 | -0.118826 |
| 36 | 6 | 0 | -4.813258 | 0.489269  | -1.400290 |
| 37 | 6 | 0 | 0.212954  | -3.211673 | 1.674742  |
| 38 | 6 | 0 | 1.594877  | -2.527682 | 1.738125  |
| 39 | 1 | 0 | 1.508846  | -1.437547 | 1.771840  |
| 40 | 1 | 0 | 2.132169  | -2.846643 | 2.637714  |
| 41 | 1 | 0 | 2.213654  | -2.786612 | 0.871372  |
| 42 | 6 | 0 | 0.414518  | -4.741333 | 1.665349  |
| 43 | 1 | 0 | 1.002503  | -5.061885 | 0.796875  |
| 44 | 1 | 0 | 0.957004  | -5.054175 | 2.563613  |
| 45 | 1 | 0 | -0.534949 | -5.288859 | 1.653058  |
| 46 | 6 | 0 | -0.622895 | -2.794519 | 2.899470  |
| 47 | 1 | 0 | -0.778203 | -1.711339 | 2.921341  |
| 48 | 1 | 0 | -1.604683 | -3.280854 | 2.917165  |
| 49 | 1 | 0 | -0.101904 | -3.074835 | 3.821249  |
| 50 | 6 | 0 | -4.771669 | 2.007627  | -1.121061 |
| 51 | 1 | 0 | -3.749628 | 2.398734  | -1.129441 |
| 52 | 1 | 0 | -5.341840 | 2.545957  | -1.886004 |
| 53 | 1 | 0 | -5.217683 | 2.242531  | -0.147068 |
| 54 | 6 | 0 | -6.279909 | 0.010269  | -1.372782 |
| 55 | 1 | 0 | -6.737128 | 0.172718  | -0.389131 |
| 56 | 1 | 0 | -6.871218 | 0.566883  | -2.107403 |
| 57 | 1 | 0 | -6.371302 | -1.054026 | -1.619564 |
| 58 | 6 | 0 | -4.195525 | 0.212602  | -2.784721 |
| 59 | 1 | 0 | -3.155556 | 0.548683  | -2.831704 |
| 60 | 1 | 0 | -4.223515 | -0.850244 | -3.050294 |
| 61 | 1 | 0 | -4.757099 | 0.753025  | -3.554227 |
| 62 | 6 | 0 | -0.138023 | 4.883902  | 0.816359  |
| 63 | 1 | 0 | -1.070167 | 4.624895  | 0.312298  |
| 64 | 1 | 0 | -0.332662 | 5.687151  | 1.536419  |
| 65 | 1 | 0 | 0.573259  | 5.257751  | 0.072414  |
| 66 | 6 | 0 | 1.767996  | 4.047927  | 2.234173  |

|    |   |   |           |          |          |
|----|---|---|-----------|----------|----------|
| 67 | 1 | 0 | 1.593233  | 4.827347 | 2.983387 |
| 68 | 1 | 0 | 2.206581  | 3.176882 | 2.731121 |
| 69 | 1 | 0 | 2.488691  | 4.421353 | 1.500635 |
| 70 | 6 | 0 | -0.530093 | 3.079750 | 2.569690 |
| 71 | 1 | 0 | -0.104725 | 2.179083 | 3.026107 |
| 72 | 1 | 0 | -0.711179 | 3.809915 | 3.366955 |
| 73 | 1 | 0 | -1.481730 | 2.825489 | 2.101315 |

*anti-trans*-TSR

Standard orientation:

| Center<br>Number | Atomic<br>Number | Atomic<br>Type | Coordinates (Angstroms) |           |           |
|------------------|------------------|----------------|-------------------------|-----------|-----------|
|                  |                  |                | X                       | Y         | Z         |
| 1                | 6                | 0              | -0.965487               | 2.524719  | -0.630020 |
| 2                | 8                | 0              | -0.152488               | 3.030865  | 0.355607  |
| 3                | 8                | 0              | -2.192302               | 2.748840  | -0.662740 |
| 4                | 6                | 0              | -0.287122               | 1.676491  | -1.557266 |
| 5                | 6                | 0              | 3.561053                | 0.487309  | -1.415057 |
| 6                | 6                | 0              | 2.169369                | 0.780427  | -1.378585 |
| 7                | 6                | 0              | 1.038184                | 1.272364  | -1.472494 |
| 8                | 1                | 0              | -0.853486               | 1.422991  | -2.449983 |
| 9                | 6                | 0              | -0.655813               | 3.924778  | 1.394033  |
| 10               | 6                | 0              | 4.100705                | -0.389693 | -2.388319 |
| 11               | 6                | 0              | 5.463662                | -0.682394 | -2.412993 |
| 12               | 6                | 0              | 6.332570                | -0.121292 | -1.469418 |
| 13               | 6                | 0              | 5.813959                | 0.747616  | -0.501297 |
| 14               | 6                | 0              | 4.453832                | 1.049900  | -0.469452 |
| 15               | 1                | 0              | 3.435851                | -0.825103 | -3.128944 |
| 16               | 1                | 0              | 5.851269                | -1.351541 | -3.177360 |
| 17               | 1                | 0              | 7.393835                | -0.351143 | -1.492026 |
| 18               | 1                | 0              | 6.476847                | 1.199587  | 0.232508  |
| 19               | 1                | 0              | 4.062365                | 1.733276  | 0.278060  |
| 20               | 6                | 0              | -0.486467               | -3.550797 | 0.591798  |
| 21               | 6                | 0              | 0.799644                | -2.656354 | 0.564152  |
| 22               | 7                | 0              | -1.558967               | -2.553831 | 0.609468  |
| 23               | 6                | 0              | -1.067786               | -1.399597 | 0.081127  |
| 24               | 7                | 0              | 0.256076                | -1.368724 | 0.061342  |
| 25               | 6                | 0              | -2.955862               | -2.687346 | 0.186359  |
| 26               | 6                | 0              | -3.351933               | -1.200126 | -0.076199 |
| 27               | 7                | 0              | -2.025296               | -0.591823 | -0.346162 |
| 28               | 1                | 0              | -0.532040               | -4.197518 | 1.469546  |
| 29               | 1                | 0              | -0.555018               | -4.178342 | -0.309340 |
| 30               | 1                | 0              | -3.569964               | -3.144406 | 0.964476  |
| 31               | 1                | 0              | -3.025333               | -3.297251 | -0.726575 |
| 32               | 1                | 0              | -1.828080               | 0.361330  | -0.666763 |
| 33               | 1                | 0              | -3.743085               | -0.773270 | 0.858005  |
| 34               | 1                | 0              | 1.504979                | -3.041376 | -0.179829 |
| 35               | 1                | 0              | 0.822172                | -0.617021 | -0.364194 |
| 36               | 6                | 0              | -4.403431               | -0.945069 | -1.188611 |
| 37               | 6                | 0              | 1.568301                | -2.527386 | 1.913809  |
| 38               | 6                | 0              | 2.726305                | -1.526537 | 1.727028  |
| 39               | 1                | 0              | 2.362587                | -0.517038 | 1.515479  |
| 40               | 1                | 0              | 3.329243                | -1.477068 | 2.640097  |
| 41               | 1                | 0              | 3.389248                | -1.819361 | 0.905657  |
| 42               | 6                | 0              | 2.161043                | -3.908966 | 2.263762  |
| 43               | 1                | 0              | 2.811607                | -4.279080 | 1.462360  |
| 44               | 1                | 0              | 2.767924                | -3.835172 | 3.172125  |
| 45               | 1                | 0              | 1.388906                | -4.664067 | 2.450934  |
| 46               | 6                | 0              | 0.653065                | -2.042653 | 3.054565  |
| 47               | 1                | 0              | 0.218292                | -1.063561 | 2.829767  |

|    |   |   |           |           |           |
|----|---|---|-----------|-----------|-----------|
| 48 | 1 | 0 | -0.164676 | -2.742476 | 3.258345  |
| 49 | 1 | 0 | 1.234236  | -1.940295 | 3.977248  |
| 50 | 6 | 0 | -4.788410 | 0.550338  | -1.169683 |
| 51 | 1 | 0 | -3.934343 | 1.215612  | -1.334383 |
| 52 | 1 | 0 | -5.530051 | 0.753160  | -1.950163 |
| 53 | 1 | 0 | -5.236371 | 0.825685  | -0.207352 |
| 54 | 6 | 0 | -5.654483 | -1.789232 | -0.862690 |
| 55 | 1 | 0 | -6.036120 | -1.568425 | 0.141495  |
| 56 | 1 | 0 | -6.453594 | -1.560438 | -1.575232 |
| 57 | 1 | 0 | -5.458448 | -2.866083 | -0.926147 |
| 58 | 6 | 0 | -3.867161 | -1.322615 | -2.583301 |
| 59 | 1 | 0 | -2.985917 | -0.731628 | -2.849622 |
| 60 | 1 | 0 | -3.599696 | -2.383155 | -2.656348 |
| 61 | 1 | 0 | -4.637544 | -1.130200 | -3.337243 |
| 62 | 6 | 0 | -1.216739 | 5.212042  | 0.772784  |
| 63 | 1 | 0 | -2.106375 | 5.002540  | 0.177258  |
| 64 | 1 | 0 | -1.475976 | 5.923457  | 1.565687  |
| 65 | 1 | 0 | -0.463013 | 5.678111  | 0.129277  |
| 66 | 6 | 0 | 0.603225  | 4.235946  | 2.212858  |
| 67 | 1 | 0 | 0.362404  | 4.914676  | 3.038184  |
| 68 | 1 | 0 | 1.028430  | 3.317078  | 2.629362  |
| 69 | 1 | 0 | 1.362098  | 4.708193  | 1.581584  |
| 70 | 6 | 0 | -1.696677 | 3.212512  | 2.271391  |
| 71 | 1 | 0 | -1.280908 | 2.278544  | 2.667062  |
| 72 | 1 | 0 | -1.963848 | 3.850268  | 3.122146  |
| 73 | 1 | 0 | -2.598031 | 2.987201  | 1.699698  |

-----  
*anti-trans-IM2*

Standard orientation:

| Center<br>Number | Atomic<br>Number | Atomic<br>Type | Coordinates (Angstroms) |           |           |
|------------------|------------------|----------------|-------------------------|-----------|-----------|
|                  |                  |                | X                       | Y         | Z         |
| 1                | 6                | 0              | -1.464107               | 2.620845  | -0.544026 |
| 2                | 8                | 0              | -0.676512               | 2.993492  | 0.519000  |
| 3                | 8                | 0              | -2.640100               | 2.983641  | -0.664695 |
| 4                | 6                | 0              | -0.794727               | 1.726270  | -1.456458 |
| 5                | 6                | 0              | 3.142864                | 0.912595  | -1.477266 |
| 6                | 6                | 0              | 1.722548                | 0.990530  | -1.349687 |
| 7                | 6                | 0              | 0.556395                | 1.407856  | -1.413734 |
| 8                | 1                | 0              | -1.330584               | 1.562328  | -2.389217 |
| 9                | 6                | 0              | -1.147982               | 3.927013  | 1.539363  |
| 10               | 6                | 0              | 3.743737                | 0.153779  | -2.510731 |
| 11               | 6                | 0              | 5.131033                | 0.067434  | -2.623273 |
| 12               | 6                | 0              | 5.963813                | 0.722691  | -1.708703 |
| 13               | 6                | 0              | 5.383810                | 1.475292  | -0.680139 |
| 14               | 6                | 0              | 3.998191                | 1.570996  | -0.560930 |
| 15               | 1                | 0              | 3.105607                | -0.352636 | -3.229477 |
| 16               | 1                | 0              | 5.565032                | -0.512913 | -3.433817 |
| 17               | 1                | 0              | 7.043935                | 0.654171  | -1.799633 |
| 18               | 1                | 0              | 6.016911                | 1.998637  | 0.032161  |
| 19               | 1                | 0              | 3.556608                | 2.165814  | 0.232993  |
| 20               | 6                | 0              | 0.039463                | -3.717768 | 0.601284  |
| 21               | 6                | 0              | 1.252755                | -2.723242 | 0.569611  |
| 22               | 7                | 0              | -1.113499               | -2.813408 | 0.629906  |
| 23               | 6                | 0              | -0.714070               | -1.616573 | 0.116176  |
| 24               | 7                | 0              | 0.602505                | -1.470802 | 0.112172  |
| 25               | 6                | 0              | -2.483433               | -3.056805 | 0.166238  |
| 26               | 6                | 0              | -2.993951               | -1.603057 | -0.093660 |
| 27               | 7                | 0              | -1.717828               | -0.881119 | -0.325971 |
| 28               | 1                | 0              | 0.052073                | -4.372145 | 1.474663  |

|    |   |   |           |           |           |
|----|---|---|-----------|-----------|-----------|
| 29 | 1 | 0 | 0.016901  | -4.344184 | -0.302987 |
| 30 | 1 | 0 | -3.079274 | -3.572917 | 0.921322  |
| 31 | 1 | 0 | -2.475815 | -3.658971 | -0.754716 |
| 32 | 1 | 0 | -1.568308 | 0.092935  | -0.687345 |
| 33 | 1 | 0 | -3.441940 | -1.222205 | 0.835185  |
| 34 | 1 | 0 | 1.967895  | -3.038598 | -0.198121 |
| 35 | 1 | 0 | 1.070490  | -0.657312 | -0.332000 |
| 36 | 6 | 0 | -4.040126 | -1.425324 | -1.225642 |
| 37 | 6 | 0 | -3.444653 | -1.734149 | -2.613004 |
| 38 | 1 | 0 | -4.213856 | -1.603078 | -3.381234 |
| 39 | 1 | 0 | -2.615544 | -1.062268 | -2.853377 |
| 40 | 1 | 0 | -3.079713 | -2.764833 | -2.691270 |
| 41 | 6 | 0 | -5.219238 | -2.380028 | -0.937755 |
| 42 | 1 | 0 | -5.638355 | -2.209088 | 0.061270  |
| 43 | 1 | 0 | -6.021322 | -2.211427 | -1.663690 |
| 44 | 1 | 0 | -4.929043 | -3.434723 | -1.011361 |
| 45 | 6 | 0 | -4.558879 | 0.028586  | -1.195101 |
| 46 | 1 | 0 | -5.308082 | 0.174476  | -1.980879 |
| 47 | 1 | 0 | -5.038181 | 0.253978  | -0.235203 |
| 48 | 1 | 0 | -3.772634 | 0.774319  | -1.348546 |
| 49 | 6 | 0 | 2.043145  | -2.565434 | 1.902682  |
| 50 | 6 | 0 | 3.115689  | -1.474212 | 1.708984  |
| 51 | 1 | 0 | 2.669271  | -0.491367 | 1.534243  |
| 52 | 1 | 0 | 3.740588  | -1.398648 | 2.605276  |
| 53 | 1 | 0 | 3.773802  | -1.698037 | 0.861889  |
| 54 | 6 | 0 | 2.747799  | -3.904089 | 2.207902  |
| 55 | 1 | 0 | 3.410615  | -4.202640 | 1.386838  |
| 56 | 1 | 0 | 3.362884  | -3.806818 | 3.108538  |
| 57 | 1 | 0 | 2.039511  | -4.721140 | 2.386697  |
| 58 | 6 | 0 | 1.121484  | -2.174049 | 3.073369  |
| 59 | 1 | 0 | 0.603545  | -1.230584 | 2.874321  |
| 60 | 1 | 0 | 0.367546  | -2.940478 | 3.283572  |
| 61 | 1 | 0 | 1.714490  | -2.039860 | 3.984439  |
| 62 | 6 | 0 | -1.488711 | 5.285396  | 0.909854  |
| 63 | 1 | 0 | -2.350253 | 5.203384  | 0.245826  |
| 64 | 1 | 0 | -1.714284 | 6.012536  | 1.698555  |
| 65 | 1 | 0 | -0.634392 | 5.659110  | 0.335412  |
| 66 | 6 | 0 | -2.339974 | 3.338231  | 2.308582  |
| 67 | 1 | 0 | -2.079795 | 2.353053  | 2.712540  |
| 68 | 1 | 0 | -2.596489 | 3.991747  | 3.150636  |
| 69 | 1 | 0 | -3.210525 | 3.237271  | 1.659159  |
| 70 | 6 | 0 | 0.067526  | 4.059815  | 2.464899  |
| 71 | 1 | 0 | 0.336917  | 3.086479  | 2.887917  |
| 72 | 1 | 0 | 0.930196  | 4.443303  | 1.911460  |
| 73 | 1 | 0 | -0.154190 | 4.747980  | 3.287748  |

-----  
*anti-trans*-TS2

Standard orientation:

| Center<br>Number | Atomic<br>Number | Atomic<br>Type | Coordinates (Angstroms) |           |           |
|------------------|------------------|----------------|-------------------------|-----------|-----------|
|                  |                  |                | X                       | Y         | Z         |
| 1                | 6                | 0              | -0.991206               | -3.691922 | 0.653099  |
| 2                | 6                | 0              | 0.441675                | -3.047603 | 0.621313  |
| 3                | 7                | 0              | -1.853455               | -2.510198 | 0.599175  |
| 4                | 6                | 0              | -1.113183               | -1.502746 | 0.043388  |
| 5                | 7                | 0              | 0.182478                | -1.699068 | 0.056334  |
| 6                | 6                | 0              | -3.228161               | -2.388553 | 0.113296  |
| 7                | 6                | 0              | -3.314510               | -0.861621 | -0.194263 |
| 8                | 7                | 0              | -1.895142               | -0.544391 | -0.468566 |
| 9                | 1                | 0              | -1.176681               | -4.280444 | 1.553858  |



|    |   |   |           |           |           |
|----|---|---|-----------|-----------|-----------|
| 10 | 1 | 0 | -1.157199 | -4.335725 | -0.224319 |
| 11 | 6 | 0 | 1.200407  | -3.011863 | 1.982663  |
| 12 | 1 | 0 | -3.954215 | -2.695589 | 0.868950  |
| 13 | 1 | 0 | -3.378909 | -2.996803 | -0.791784 |
| 14 | 6 | 0 | -4.291118 | -0.429835 | -1.320038 |
| 15 | 6 | 0 | -3.878007 | -0.989073 | -2.695170 |
| 16 | 6 | 0 | -4.317442 | 1.112764  | -1.381515 |
| 17 | 6 | 0 | -5.700629 | -0.938238 | -0.949677 |
| 18 | 6 | 0 | 2.529465  | -2.255682 | 1.780619  |
| 19 | 6 | 0 | 1.514942  | -4.461647 | 2.408170  |
| 20 | 6 | 0 | 0.378277  | -2.308798 | 3.079711  |
| 21 | 1 | 0 | -4.577627 | -0.638028 | -3.461166 |
| 22 | 1 | 0 | -2.875002 | -0.657086 | -2.979175 |
| 23 | 1 | 0 | -3.891326 | -2.084361 | -2.720544 |
| 24 | 1 | 0 | -5.036800 | 1.448432  | -2.136229 |
| 25 | 1 | 0 | -4.617951 | 1.545045  | -0.420162 |
| 26 | 1 | 0 | -3.345532 | 1.540817  | -1.646508 |
| 27 | 1 | 0 | -6.434254 | -0.574499 | -1.676648 |
| 28 | 1 | 0 | -5.756887 | -2.032919 | -0.948052 |
| 29 | 1 | 0 | -6.009574 | -0.579028 | 0.039429  |
| 30 | 1 | 0 | 3.113969  | -2.265849 | 2.707216  |
| 31 | 1 | 0 | 3.139727  | -2.718060 | 0.996353  |
| 32 | 1 | 0 | 2.361689  | -1.212014 | 1.500149  |
| 33 | 1 | 0 | 2.101818  | -4.464315 | 3.332944  |
| 34 | 1 | 0 | 0.609814  | -5.050132 | 2.598073  |
| 35 | 1 | 0 | 2.102930  | -4.982829 | 1.642839  |
| 36 | 1 | 0 | 0.951547  | -2.276659 | 4.012862  |
| 37 | 1 | 0 | 0.144935  | -1.277132 | 2.798452  |
| 38 | 1 | 0 | -0.563390 | -2.827662 | 3.290784  |
| 39 | 1 | 0 | 0.914356  | -0.934171 | -0.497345 |
| 40 | 1 | 0 | -3.623352 | -0.343052 | 0.726000  |
| 41 | 1 | 0 | 1.075019  | -3.598761 | -0.083749 |
| 42 | 1 | 0 | -1.524917 | 0.372199  | -0.734229 |
| 43 | 6 | 0 | -0.528300 | 3.056382  | -0.484882 |
| 44 | 8 | 0 | 0.283004  | 3.057175  | 0.611085  |
| 45 | 8 | 0 | -1.469397 | 3.832520  | -0.636319 |
| 46 | 6 | 0 | -0.180260 | 2.018409  | -1.452546 |
| 47 | 6 | 0 | 3.106026  | 0.019376  | -1.484788 |
| 48 | 6 | 0 | 1.677990  | 0.187282  | -1.210391 |
| 49 | 6 | 0 | 0.855985  | 1.154197  | -1.345345 |
| 50 | 1 | 0 | -0.753820 | 2.068804  | -2.376393 |
| 51 | 6 | 0 | 0.117848  | 4.028427  | 1.697663  |
| 52 | 6 | 0 | 4.039460  | 1.039214  | -1.202405 |
| 53 | 6 | 0 | 5.401181  | 0.851374  | -1.442220 |
| 54 | 6 | 0 | 5.868572  | -0.355015 | -1.976137 |
| 55 | 6 | 0 | 4.955914  | -1.374940 | -2.262590 |
| 56 | 6 | 0 | 3.594468  | -1.193770 | -2.009504 |
| 57 | 1 | 0 | 3.680287  | 1.977298  | -0.789717 |
| 58 | 1 | 0 | 6.100711  | 1.652269  | -1.216178 |
| 59 | 1 | 0 | 6.928814  | -0.497540 | -2.165409 |
| 60 | 1 | 0 | 5.305015  | -2.315651 | -2.681006 |
| 61 | 1 | 0 | 2.890472  | -1.991077 | -2.234154 |
| 62 | 6 | 0 | 1.242113  | 3.644002  | 2.666023  |
| 63 | 6 | 0 | -1.250459 | 3.855259  | 2.371474  |
| 64 | 6 | 0 | 0.325524  | 5.456010  | 1.174266  |
| 65 | 1 | 0 | 1.232157  | 4.305627  | 3.538645  |
| 66 | 1 | 0 | 1.118958  | 2.611997  | 3.009278  |
| 67 | 1 | 0 | 2.216974  | 3.727577  | 2.176076  |
| 68 | 1 | 0 | -1.304269 | 4.492943  | 3.261192  |
| 69 | 1 | 0 | -2.060358 | 4.126724  | 1.693014  |
| 70 | 1 | 0 | -1.385743 | 2.816097  | 2.691564  |
| 71 | 1 | 0 | 0.331894  | 6.158249  | 2.015632  |

|    |   |   |           |          |          |
|----|---|---|-----------|----------|----------|
| 72 | 1 | 0 | 1.289000  | 5.533486 | 0.659376 |
| 73 | 1 | 0 | -0.467742 | 5.741531 | 0.482067 |

-----

*anti-trans-IM3*

Standard orientation:

| Center Number | Atomic Number | Atomic Type | Coordinates (Angstroms) |           |           |
|---------------|---------------|-------------|-------------------------|-----------|-----------|
|               |               |             | X                       | Y         | Z         |
| 1             | 6             | 0           | -2.306657               | -2.613838 | -0.022315 |
| 2             | 8             | 0           | -2.746562               | -1.858180 | 0.999082  |
| 3             | 8             | 0           | -2.323601               | -3.833697 | -0.063044 |
| 4             | 6             | 0           | -1.771879               | -1.795671 | -1.148323 |
| 5             | 6             | 0           | -2.584415               | 1.792098  | -1.656387 |
| 6             | 6             | 0           | -1.576540               | 0.825809  | -1.178003 |
| 7             | 6             | 0           | -1.696790               | -0.480335 | -1.162883 |
| 8             | 1             | 0           | -1.448516               | -2.388320 | -2.002963 |
| 9             | 6             | 0           | -3.323960               | -2.449073 | 2.224793  |
| 10            | 6             | 0           | -3.842869               | 1.395898  | -2.146084 |
| 11            | 6             | 0           | -4.761638               | 2.345333  | -2.589196 |
| 12            | 6             | 0           | -4.443953               | 3.708933  | -2.551064 |
| 13            | 6             | 0           | -3.197589               | 4.113127  | -2.065909 |
| 14            | 6             | 0           | -2.275274               | 3.162695  | -1.622229 |
| 15            | 1             | 0           | -4.096392               | 0.339796  | -2.176396 |
| 16            | 1             | 0           | -5.729095               | 2.023218  | -2.964633 |
| 17            | 1             | 0           | -5.162478               | 4.446818  | -2.896431 |
| 18            | 1             | 0           | -2.941702               | 5.168532  | -2.032030 |
| 19            | 1             | 0           | -1.305945               | 3.476746  | -1.245291 |
| 20            | 6             | 0           | 3.842423                | 1.980594  | 0.514667  |
| 21            | 6             | 0           | 2.389109                | 2.579211  | 0.638179  |
| 22            | 7             | 0           | 3.546464                | 0.556715  | 0.404389  |
| 23            | 6             | 0           | 2.232995                | 0.483853  | -0.040248 |
| 24            | 7             | 0           | 1.493675                | 1.532071  | 0.078692  |
| 25            | 6             | 0           | 4.320729                | -0.487913 | -0.249612 |
| 26            | 6             | 0           | 3.229330                | -1.576181 | -0.469405 |
| 27            | 7             | 0           | 2.021605                | -0.742067 | -0.624261 |
| 28            | 1             | 0           | 4.482784                | 2.194162  | 1.374629  |
| 29            | 1             | 0           | 4.346304                | 2.351963  | -0.392900 |
| 30            | 1             | 0           | 5.136955                | -0.850449 | 0.380640  |
| 31            | 1             | 0           | 4.743067                | -0.138899 | -1.206381 |
| 32            | 1             | 0           | 1.097167                | -1.150457 | -0.594203 |
| 33            | 1             | 0           | 3.158222                | -2.172231 | 0.455339  |
| 34            | 1             | 0           | 2.312234                | 3.467199  | -0.003083 |
| 35            | 1             | 0           | -0.635801               | 1.237263  | -0.791426 |
| 36            | 6             | 0           | 3.460273                | -2.569488 | -1.640378 |
| 37            | 6             | 0           | 2.301432                | -3.589822 | -1.649987 |
| 38            | 1             | 0           | 1.341148                | -3.113205 | -1.875217 |
| 39            | 1             | 0           | 2.470395                | -4.354306 | -2.416317 |
| 40            | 1             | 0           | 2.208578                | -4.101514 | -0.684564 |
| 41            | 6             | 0           | 4.783073                | -3.321929 | -1.386023 |
| 42            | 1             | 0           | 4.776498                | -3.827054 | -0.412417 |
| 43            | 1             | 0           | 4.939442                | -4.086443 | -2.154840 |
| 44            | 1             | 0           | 5.646717                | -2.647968 | -1.413021 |
| 45            | 6             | 0           | 3.515617                | -1.859800 | -3.007128 |
| 46            | 1             | 0           | 3.594347                | -2.601979 | -3.809399 |
| 47            | 1             | 0           | 2.614903                | -1.263439 | -3.179740 |
| 48            | 1             | 0           | 4.381719                | -1.195090 | -3.092688 |
| 49            | 6             | 0           | 1.973349                | 3.042788  | 2.069515  |
| 50            | 6             | 0           | 0.511644                | 3.532384  | 2.015684  |
| 51            | 1             | 0           | -0.161273               | 2.724943  | 1.716383  |
| 52            | 1             | 0           | 0.195700                | 3.903714  | 2.997809  |

|    |   |   |           |           |          |
|----|---|---|-----------|-----------|----------|
| 53 | 1 | 0 | 0.396498  | 4.352883  | 1.296373 |
| 54 | 6 | 0 | 2.869633  | 4.221738  | 2.502925 |
| 55 | 1 | 0 | 2.817151  | 5.046599  | 1.781278 |
| 56 | 1 | 0 | 2.543894  | 4.611023  | 3.474390 |
| 57 | 1 | 0 | 3.921369  | 3.931406  | 2.605394 |
| 58 | 6 | 0 | 2.084645  | 1.898441  | 3.095011 |
| 59 | 1 | 0 | 1.454062  | 1.052416  | 2.804450 |
| 60 | 1 | 0 | 3.113525  | 1.535871  | 3.195348 |
| 61 | 1 | 0 | 1.755744  | 2.240992  | 4.083216 |
| 62 | 6 | 0 | -4.592302 | -3.237469 | 1.878351 |
| 63 | 1 | 0 | -4.364015 | -4.120142 | 1.278978 |
| 64 | 1 | 0 | -5.081458 | -3.559943 | 2.803937 |
| 65 | 1 | 0 | -5.295306 | -2.604634 | 1.326701 |
| 66 | 6 | 0 | -2.275210 | -3.313213 | 2.934605 |
| 67 | 1 | 0 | -2.667370 | -3.631564 | 3.906635 |
| 68 | 1 | 0 | -2.026939 | -4.201052 | 2.351006 |
| 69 | 1 | 0 | -1.362116 | -2.735172 | 3.111506 |
| 70 | 6 | 0 | -3.663858 | -1.211653 | 3.059836 |
| 71 | 1 | 0 | -2.763152 | -0.626634 | 3.268293 |
| 72 | 1 | 0 | -4.374590 | -0.570966 | 2.529392 |
| 73 | 1 | 0 | -4.111105 | -1.515200 | 4.011842 |

-----  
*syn-cis*-COM

Standard orientation:

| Center<br>Number | Atomic<br>Number | Atomic<br>Type | Coordinates (Angstroms) |           |           |
|------------------|------------------|----------------|-------------------------|-----------|-----------|
|                  |                  |                | X                       | Y         | Z         |
| 1                | 6                | 0              | -0.177460               | 2.314260  | -1.056624 |
| 2                | 8                | 0              | -0.487794               | 3.290385  | -1.917002 |
| 3                | 8                | 0              | -0.617280               | 2.208008  | 0.077154  |
| 4                | 6                | 0              | 0.776335                | 1.306883  | -1.692561 |
| 5                | 6                | 0              | 4.089071                | 0.573688  | 0.618883  |
| 6                | 6                | 0              | 2.933218                | 0.830680  | -0.184214 |
| 7                | 6                | 0              | 1.950669                | 1.046735  | -0.863396 |
| 8                | 1                | 0              | 1.070625                | 1.659078  | -2.685553 |
| 9                | 6                | 0              | -1.452082               | 4.371489  | -1.588788 |
| 10               | 6                | 0              | 4.103895                | 0.921321  | 1.985087  |
| 11               | 6                | 0              | 5.233408                | 0.672888  | 2.764667  |
| 12               | 6                | 0              | 6.365010                | 0.075610  | 2.199522  |
| 13               | 6                | 0              | 6.359651                | -0.273094 | 0.844957  |
| 14               | 6                | 0              | 5.234262                | -0.027742 | 0.058400  |
| 15               | 1                | 0              | 3.225357                | 1.386124  | 2.421493  |
| 16               | 1                | 0              | 5.230382                | 0.946847  | 3.816048  |
| 17               | 1                | 0              | 7.243236                | -0.116342 | 2.809257  |
| 18               | 1                | 0              | 7.234659                | -0.737797 | 0.399095  |
| 19               | 1                | 0              | 5.228877                | -0.298489 | -0.992795 |
| 20               | 1                | 0              | 0.193502                | 0.374277  | -1.817477 |
| 21               | 6                | 0              | -2.010970               | -3.608678 | -0.726348 |
| 22               | 6                | 0              | -1.248453               | -2.852912 | -1.880069 |
| 23               | 7                | 0              | -1.694366               | -2.762648 | 0.417520  |
| 24               | 6                | 0              | -1.371593               | -1.519962 | -0.119925 |
| 25               | 7                | 0              | -1.061243               | -1.468443 | -1.372849 |
| 26               | 6                | 0              | -2.473648               | -2.553059 | 1.629070  |
| 27               | 6                | 0              | -1.905075               | -1.187376 | 2.115868  |
| 28               | 7                | 0              | -1.539811               | -0.560868 | 0.836524  |
| 29               | 1                | 0              | -1.675363               | -4.637848 | -0.573363 |
| 30               | 1                | 0              | -2.315171               | -3.347663 | 2.363026  |
| 31               | 1                | 0              | -1.078291               | 0.341064  | 0.763600  |
| 32               | 6                | 0              | -2.835813               | -0.317148 | 3.003910  |
| 33               | 6                | 0              | -4.109626               | 0.124768  | 2.258169  |

|    |   |   |           |           |           |
|----|---|---|-----------|-----------|-----------|
| 34 | 1 | 0 | -3.861487 | 0.669189  | 1.342387  |
| 35 | 1 | 0 | -4.707280 | 0.783732  | 2.898390  |
| 36 | 1 | 0 | -4.742809 | -0.725350 | 1.982580  |
| 37 | 6 | 0 | -3.218816 | -1.133894 | 4.255493  |
| 38 | 1 | 0 | -3.824846 | -2.010803 | 4.001269  |
| 39 | 1 | 0 | -3.805209 | -0.518463 | 4.946735  |
| 40 | 1 | 0 | -2.328586 | -1.481208 | 4.793992  |
| 41 | 6 | 0 | -2.052001 | 0.937288  | 3.448787  |
| 42 | 1 | 0 | -1.775956 | 1.570110  | 2.598964  |
| 43 | 1 | 0 | -1.132107 | 0.661746  | 3.978779  |
| 44 | 1 | 0 | -2.659807 | 1.544647  | 4.129268  |
| 45 | 6 | 0 | 0.078741  | -3.524844 | -2.355481 |
| 46 | 6 | 0 | 0.712290  | -2.634844 | -3.444448 |
| 47 | 1 | 0 | 0.017788  | -2.475763 | -4.278753 |
| 48 | 1 | 0 | 1.617300  | -3.106481 | -3.845899 |
| 49 | 1 | 0 | 0.983921  | -1.656126 | -3.041761 |
| 50 | 6 | 0 | -0.241150 | -4.900351 | -2.977988 |
| 51 | 1 | 0 | -0.963778 | -4.807530 | -3.798571 |
| 52 | 1 | 0 | -0.652835 | -5.603831 | -2.245676 |
| 53 | 1 | 0 | 0.668685  | -5.354005 | -3.387983 |
| 54 | 6 | 0 | 1.079569  | -3.696298 | -1.196944 |
| 55 | 1 | 0 | 1.319700  | -2.730570 | -0.742050 |
| 56 | 1 | 0 | 2.013520  | -4.138426 | -1.564304 |
| 57 | 1 | 0 | 0.688400  | -4.352813 | -0.412081 |
| 58 | 1 | 0 | -1.897130 | -2.805091 | -2.765090 |
| 59 | 1 | 0 | -0.996971 | -1.394449 | 2.707124  |
| 60 | 1 | 0 | -3.097130 | -3.624962 | -0.918324 |
| 61 | 1 | 0 | -3.552842 | -2.487333 | 1.409027  |
| 62 | 6 | 0 | -0.920916 | 5.198660  | -0.413756 |
| 63 | 1 | 0 | -1.568898 | 6.069189  | -0.265561 |
| 64 | 1 | 0 | -0.901352 | 4.617133  | 0.508991  |
| 65 | 1 | 0 | 0.089988  | 5.560949  | -0.626997 |
| 66 | 6 | 0 | -2.832766 | 3.768820  | -1.310264 |
| 67 | 1 | 0 | -3.565090 | 4.577727  | -1.215272 |
| 68 | 1 | 0 | -3.143660 | 3.125066  | -2.139331 |
| 69 | 1 | 0 | -2.837780 | 3.184826  | -0.389007 |
| 70 | 6 | 0 | -1.467637 | 5.199118  | -2.876296 |
| 71 | 1 | 0 | -1.803691 | 4.592636  | -3.722718 |
| 72 | 1 | 0 | -2.149724 | 6.047761  | -2.764132 |
| 73 | 1 | 0 | -0.468301 | 5.583778  | -3.101190 |

-----  
*syn-cis*-TS1

Standard orientation:

| Center<br>Number | Atomic<br>Number | Atomic<br>Type | Coordinates (Angstroms) |           |           |
|------------------|------------------|----------------|-------------------------|-----------|-----------|
|                  |                  |                | X                       | Y         | Z         |
| 1                | 6                | 0              | 1.503231                | -1.921425 | -0.583161 |
| 2                | 8                | 0              | 2.490369                | -2.410317 | -1.377697 |
| 3                | 8                | 0              | 1.688476                | -1.617035 | 0.605507  |
| 4                | 6                | 0              | 0.265106                | -1.713058 | -1.327686 |
| 5                | 6                | 0              | -3.276060               | -1.981893 | 0.669767  |
| 6                | 6                | 0              | -2.036602               | -1.897307 | -0.028229 |
| 7                | 6                | 0              | -0.964543               | -1.853735 | -0.611785 |
| 8                | 1                | 0              | 0.275440                | -2.177429 | -2.314774 |
| 9                | 6                | 0              | 3.868489                | -2.611238 | -0.909399 |
| 10               | 6                | 0              | -3.313664               | -1.964723 | 2.082423  |
| 11               | 6                | 0              | -4.527305               | -2.047996 | 2.763716  |
| 12               | 6                | 0              | -5.732399               | -2.151582 | 2.059835  |
| 13               | 6                | 0              | -5.708752               | -2.172649 | 0.660954  |
| 14               | 6                | 0              | -4.499718               | -2.088477 | -0.028761 |

|    |   |   |           |           |           |
|----|---|---|-----------|-----------|-----------|
| 15 | 1 | 0 | -2.379665 | -1.893503 | 2.631398  |
| 16 | 1 | 0 | -4.532457 | -2.036351 | 3.850623  |
| 17 | 1 | 0 | -6.675899 | -2.218900 | 2.593870  |
| 18 | 1 | 0 | -6.637779 | -2.256794 | 0.103094  |
| 19 | 1 | 0 | -4.486152 | -2.108018 | -1.114282 |
| 20 | 1 | 0 | 0.313292  | -0.259570 | -1.548474 |
| 21 | 6 | 0 | 0.064271  | 3.381664  | -1.467052 |
| 22 | 6 | 0 | -0.082975 | 2.103689  | -2.370848 |
| 23 | 7 | 0 | -0.046881 | 2.813171  | -0.124847 |
| 24 | 6 | 0 | 0.311174  | 1.493109  | -0.230391 |
| 25 | 7 | 0 | 0.294730  | 1.000670  | -1.446474 |
| 26 | 6 | 0 | 0.479214  | 3.324837  | 1.139952  |
| 27 | 6 | 0 | 0.543413  | 2.020834  | 1.997507  |
| 28 | 7 | 0 | 0.681197  | 0.991601  | 0.951266  |
| 29 | 1 | 0 | -0.707598 | 4.132258  | -1.650135 |
| 30 | 1 | 0 | -0.182361 | 4.073469  | 1.581287  |
| 31 | 1 | 0 | 0.916871  | -0.001457 | 1.072226  |
| 32 | 6 | 0 | 1.637739  | 1.958572  | 3.096374  |
| 33 | 6 | 0 | 3.060929  | 2.041859  | 2.511277  |
| 34 | 1 | 0 | 3.246843  | 1.234655  | 1.796663  |
| 35 | 1 | 0 | 3.797890  | 1.954764  | 3.317157  |
| 36 | 1 | 0 | 3.246655  | 2.994526  | 2.003490  |
| 37 | 6 | 0 | 1.402905  | 3.128877  | 4.073973  |
| 38 | 1 | 0 | 1.547084  | 4.102220  | 3.591055  |
| 39 | 1 | 0 | 2.108364  | 3.070444  | 4.909705  |
| 40 | 1 | 0 | 0.389723  | 3.103329  | 4.492879  |
| 41 | 6 | 0 | 1.483215  | 0.625561  | 3.861562  |
| 42 | 1 | 0 | 1.669899  | -0.240854 | 3.218692  |
| 43 | 1 | 0 | 0.476550  | 0.525572  | 4.284372  |
| 44 | 1 | 0 | 2.198723  | 0.579883  | 4.690059  |
| 45 | 6 | 0 | -1.473112 | 1.916293  | -3.052416 |
| 46 | 6 | 0 | -1.460377 | 0.586849  | -3.835334 |
| 47 | 1 | 0 | -0.633032 | 0.555912  | -4.555109 |
| 48 | 1 | 0 | -2.394309 | 0.471038  | -4.396741 |
| 49 | 1 | 0 | -1.365593 | -0.272886 | -3.167445 |
| 50 | 6 | 0 | -1.689092 | 3.069516  | -4.055721 |
| 51 | 1 | 0 | -0.878230 | 3.114818  | -4.793386 |
| 52 | 1 | 0 | -1.754184 | 4.046788  | -3.564410 |
| 53 | 1 | 0 | -2.625902 | 2.920426  | -4.603525 |
| 54 | 6 | 0 | -2.620631 | 1.890060  | -2.024912 |
| 55 | 1 | 0 | -2.488277 | 1.079764  | -1.301907 |
| 56 | 1 | 0 | -3.576368 | 1.726782  | -2.535693 |
| 57 | 1 | 0 | -2.700457 | 2.832936  | -1.472938 |
| 58 | 1 | 0 | 0.660266  | 2.144364  | -3.176298 |
| 59 | 1 | 0 | -0.428881 | 1.894238  | 2.498245  |
| 60 | 1 | 0 | 1.049464  | 3.853210  | -1.610905 |
| 61 | 1 | 0 | 1.476355  | 3.770875  | 0.999308  |
| 62 | 6 | 0 | 3.898808  | -3.653937 | 0.215316  |
| 63 | 1 | 0 | 4.938660  | -3.885631 | 0.472039  |
| 64 | 1 | 0 | 3.387773  | -3.288316 | 1.107015  |
| 65 | 1 | 0 | 3.415223  | -4.579621 | -0.113700 |
| 66 | 6 | 0 | 4.494809  | -1.277663 | -0.481510 |
| 67 | 1 | 0 | 5.563749  | -1.421736 | -0.287881 |
| 68 | 1 | 0 | 4.391675  | -0.535423 | -1.280388 |
| 69 | 1 | 0 | 4.024142  | -0.891702 | 0.423469  |
| 70 | 6 | 0 | 4.569333  | -3.151552 | -2.160992 |
| 71 | 1 | 0 | 4.517902  | -2.423395 | -2.976548 |
| 72 | 1 | 0 | 5.622396  | -3.358900 | -1.944167 |
| 73 | 1 | 0 | 4.093682  | -4.077985 | -2.496779 |

---

*syn-cis-IM1*

Standard orientation:

| Center<br>Number | Atomic<br>Number | Atomic<br>Type | Coordinates (Angstroms) |           |           |
|------------------|------------------|----------------|-------------------------|-----------|-----------|
|                  |                  |                | X                       | Y         | Z         |
| 1                | 6                | 0              | -2.079391               | -1.235187 | -1.225485 |
| 2                | 8                | 0              | -3.195012               | -2.032505 | -1.166279 |
| 3                | 8                | 0              | -2.180941               | 0.023720  | -1.166799 |
| 4                | 6                | 0              | -0.885593               | -1.988547 | -1.320738 |
| 5                | 6                | 0              | 2.661815                | -0.335543 | -2.354923 |
| 6                | 6                | 0              | 1.425006                | -0.911892 | -1.968480 |
| 7                | 6                | 0              | 0.337052                | -1.403613 | -1.679014 |
| 8                | 1                | 0              | -0.989473               | -3.067175 | -1.395226 |
| 9                | 6                | 0              | -4.550628               | -1.500946 | -1.067683 |
| 10               | 6                | 0              | 2.795393                | 1.064492  | -2.529484 |
| 11               | 6                | 0              | 4.013750                | 1.627020  | -2.905652 |
| 12               | 6                | 0              | 5.137293                | 0.820031  | -3.121865 |
| 13               | 6                | 0              | 5.020145                | -0.565652 | -2.958879 |
| 14               | 6                | 0              | 3.807111                | -1.138528 | -2.581250 |
| 15               | 1                | 0              | 1.923956                | 1.695383  | -2.380906 |
| 16               | 1                | 0              | 4.086189                | 2.703779  | -3.038804 |
| 17               | 1                | 0              | 6.084180                | 1.261762  | -3.418385 |
| 18               | 1                | 0              | 5.881526                | -1.206463 | -3.130365 |
| 19               | 1                | 0              | 3.724648                | -2.214829 | -2.462761 |
| 20               | 1                | 0              | -0.339876               | -1.587190 | 0.825003  |
| 21               | 6                | 0              | 1.074962                | 0.084294  | 3.386856  |
| 22               | 6                | 0              | 0.797494                | -1.325235 | 2.755005  |
| 23               | 7                | 0              | 0.890984                | 0.982293  | 2.246686  |
| 24               | 6                | 0              | 0.101235                | 0.353384  | 1.336267  |
| 25               | 7                | 0              | -0.000586               | -0.953908 | 1.561782  |
| 26               | 6                | 0              | 0.565604                | 2.410173  | 2.208698  |
| 27               | 6                | 0              | -0.028052               | 2.554192  | 0.766790  |
| 28               | 7                | 0              | -0.466744               | 1.171106  | 0.476149  |
| 29               | 1                | 0              | 2.080812                | 0.168039  | 3.802416  |
| 30               | 1                | 0              | 1.454287                | 3.028601  | 2.349048  |
| 31               | 1                | 0              | -1.081811               | 0.813232  | -0.311327 |
| 32               | 6                | 0              | -1.141637               | 3.616125  | 0.571759  |
| 33               | 6                | 0              | -2.394554               | 3.303430  | 1.412760  |
| 34               | 1                | 0              | -2.808999               | 2.323153  | 1.159579  |
| 35               | 1                | 0              | -3.167052               | 4.055060  | 1.218070  |
| 36               | 1                | 0              | -2.189940               | 3.321010  | 2.489148  |
| 37               | 6                | 0              | -0.567163               | 4.991148  | 0.972618  |
| 38               | 1                | 0              | -0.322652               | 5.040424  | 2.040219  |
| 39               | 1                | 0              | -1.299529               | 5.779442  | 0.768993  |
| 40               | 1                | 0              | 0.340300                | 5.227692  | 0.404074  |
| 41               | 6                | 0              | -1.529641               | 3.646080  | -0.923106 |
| 42               | 1                | 0              | -1.974707               | 2.701704  | -1.251240 |
| 43               | 1                | 0              | -0.656862               | 3.848336  | -1.555136 |
| 44               | 1                | 0              | -2.262338               | 4.440131  | -1.104497 |
| 45               | 6                | 0              | 2.049786                | -2.199426 | 2.448030  |
| 46               | 6                | 0              | 1.586166                | -3.483785 | 1.726827  |
| 47               | 1                | 0              | 0.828017                | -4.020887 | 2.310446  |
| 48               | 1                | 0              | 2.435769                | -4.160372 | 1.586029  |
| 49               | 1                | 0              | 1.173719                | -3.270901 | 0.735836  |
| 50               | 6                | 0              | 2.694976                | -2.598023 | 3.792475  |
| 51               | 1                | 0              | 1.983401                | -3.124575 | 4.440564  |
| 52               | 1                | 0              | 3.080301                | -1.733272 | 4.344564  |
| 53               | 1                | 0              | 3.540972                | -3.270253 | 3.615435  |
| 54               | 6                | 0              | 3.073150                | -1.459318 | 1.566754  |
| 55               | 1                | 0              | 2.637951                | -1.160962 | 0.608611  |
| 56               | 1                | 0              | 3.921834                | -2.117419 | 1.351461  |

|    |   |   |           |           |           |
|----|---|---|-----------|-----------|-----------|
| 57 | 1 | 0 | 3.471204  | -0.565149 | 2.059172  |
| 58 | 1 | 0 | 0.156307  | -1.904166 | 3.429529  |
| 59 | 1 | 0 | 0.794656  | 2.807261  | 0.082486  |
| 60 | 1 | 0 | 0.347551  | 0.308738  | 4.181545  |
| 61 | 1 | 0 | -0.170037 | 2.662292  | 2.987233  |
| 62 | 6 | 0 | -4.886312 | -0.642581 | -2.295875 |
| 63 | 1 | 0 | -5.947040 | -0.366819 | -2.275563 |
| 64 | 1 | 0 | -4.282383 | 0.265386  | -2.317827 |
| 65 | 1 | 0 | -4.699096 | -1.210411 | -3.213337 |
| 66 | 6 | 0 | -4.742664 | -0.727654 | 0.245684  |
| 67 | 1 | 0 | -5.798302 | -0.457537 | 0.364938  |
| 68 | 1 | 0 | -4.454358 | -1.352751 | 1.098225  |
| 69 | 1 | 0 | -4.142466 | 0.182997  | 0.255151  |
| 70 | 6 | 0 | -5.409918 | -2.771772 | -1.059343 |
| 71 | 1 | 0 | -5.147494 | -3.407582 | -0.207745 |
| 72 | 1 | 0 | -6.471341 | -2.511822 | -0.987465 |
| 73 | 1 | 0 | -5.252074 | -3.346054 | -1.977353 |

*syn-cis*-TSR

Standard orientation:

| Center<br>Number | Atomic<br>Number | Atomic<br>Type | Coordinates (Angstroms) |           |           |
|------------------|------------------|----------------|-------------------------|-----------|-----------|
|                  |                  |                | X                       | Y         | Z         |
| 1                | 1                | 0              | 0.616009                | -0.706854 | 1.420883  |
| 2                | 6                | 0              | -2.243639               | -1.799809 | 0.234882  |
| 3                | 8                | 0              | -3.343495               | -2.331084 | 0.865920  |
| 4                | 8                | 0              | -2.335281               | -0.703228 | -0.398474 |
| 5                | 6                | 0              | -1.096690               | -2.593702 | 0.411945  |
| 6                | 6                | 0              | 2.384568                | -1.969511 | -1.543358 |
| 7                | 6                | 0              | 1.174365                | -2.184388 | -0.842180 |
| 8                | 6                | 0              | 0.106691                | -2.356801 | -0.253311 |
| 9                | 1                | 0              | -1.203643               | -3.500733 | 0.997793  |
| 10               | 6                | 0              | -4.706470               | -1.880613 | 0.617725  |
| 11               | 6                | 0              | -4.931070               | -0.473295 | 1.189314  |
| 12               | 6                | 0              | -5.546616               | -2.902489 | 1.395194  |
| 13               | 6                | 0              | -5.040320               | -1.951957 | -0.879599 |
| 14               | 6                | 0              | 2.505620                | -0.930304 | -2.501344 |
| 15               | 6                | 0              | 3.701582                | -0.723044 | -3.185825 |
| 16               | 6                | 0              | 4.814283                | -1.539413 | -2.947393 |
| 17               | 6                | 0              | 4.707949                | -2.575740 | -2.011011 |
| 18               | 6                | 0              | 3.518765                | -2.791040 | -1.318091 |
| 19               | 1                | 0              | -5.992661               | -0.208000 | 1.121524  |
| 20               | 1                | 0              | -4.638148               | -0.443533 | 2.244457  |
| 21               | 1                | 0              | -4.346594               | 0.264930  | 0.640450  |
| 22               | 1                | 0              | -6.612065               | -2.664094 | 1.307807  |
| 23               | 1                | 0              | -5.380592               | -3.911491 | 1.005546  |
| 24               | 1                | 0              | -5.272972               | -2.895132 | 2.455048  |
| 25               | 1                | 0              | -6.105377               | -1.742054 | -1.031127 |
| 26               | 1                | 0              | -4.452999               | -1.230271 | -1.449148 |
| 27               | 1                | 0              | -4.831961               | -2.955492 | -1.265198 |
| 28               | 1                | 0              | 1.642331                | -0.303296 | -2.704265 |
| 29               | 1                | 0              | 3.764925                | 0.078196  | -3.918255 |
| 30               | 1                | 0              | 5.742759                | -1.377233 | -3.487018 |
| 31               | 1                | 0              | 5.559744                | -3.224342 | -1.821453 |
| 32               | 1                | 0              | 3.444022                | -3.600486 | -0.597949 |
| 33               | 6                | 0              | 1.599105                | 2.419483  | 2.107439  |
| 34               | 6                | 0              | 1.736167                | 0.903521  | 2.482708  |
| 35               | 7                | 0              | 1.032451                | 2.366347  | 0.759184  |
| 36               | 6                | 0              | 0.405545                | 1.166964  | 0.608337  |
| 37               | 7                | 0              | 0.765921                | 0.289806  | 1.545087  |

|    |   |   |           |           |           |
|----|---|---|-----------|-----------|-----------|
| 38 | 6 | 0 | 0.240052  | 3.369646  | 0.044425  |
| 39 | 6 | 0 | -0.491664 | 2.481277  | -1.014097 |
| 40 | 7 | 0 | -0.476391 | 1.144053  | -0.366766 |
| 41 | 1 | 0 | 2.556831  | 2.942518  | 2.115639  |
| 42 | 1 | 0 | 0.913727  | 2.935376  | 2.796393  |
| 43 | 6 | 0 | 3.174566  | 0.310313  | 2.413683  |
| 44 | 1 | 0 | 0.874992  | 4.124661  | -0.423065 |
| 45 | 1 | 0 | -0.463773 | 3.867934  | 0.728000  |
| 46 | 6 | 0 | -1.891075 | 2.961008  | -1.475407 |
| 47 | 1 | 0 | -1.168735 | 0.334406  | -0.490268 |
| 48 | 6 | 0 | 3.848313  | 0.572410  | 1.053789  |
| 49 | 6 | 0 | 3.094463  | -1.211551 | 2.663571  |
| 50 | 6 | 0 | 4.005117  | 0.951012  | 3.546447  |
| 51 | 6 | 0 | -2.906477 | 2.989002  | -0.316997 |
| 52 | 6 | 0 | -2.398633 | 2.007853  | -2.579785 |
| 53 | 6 | 0 | -1.731237 | 4.377461  | -2.068410 |
| 54 | 1 | 0 | 4.843313  | 0.115925  | 1.039468  |
| 55 | 1 | 0 | 3.281728  | 0.136371  | 0.226887  |
| 56 | 1 | 0 | 3.977004  | 1.642504  | 0.857138  |
| 57 | 1 | 0 | 4.103285  | -1.633019 | 2.726570  |
| 58 | 1 | 0 | 2.582157  | -1.438254 | 3.606909  |
| 59 | 1 | 0 | 2.578046  | -1.735050 | 1.852526  |
| 60 | 1 | 0 | 5.011574  | 0.520179  | 3.560812  |
| 61 | 1 | 0 | 4.118863  | 2.033877  | 3.420928  |
| 62 | 1 | 0 | 3.553085  | 0.769177  | 4.529224  |
| 63 | 1 | 0 | -3.009142 | 2.004129  | 0.145997  |
| 64 | 1 | 0 | -2.631068 | 3.710092  | 0.461102  |
| 65 | 1 | 0 | -3.890628 | 3.284063  | -0.696528 |
| 66 | 1 | 0 | -3.352915 | 2.371441  | -2.976842 |
| 67 | 1 | 0 | -1.689183 | 1.957996  | -3.414605 |
| 68 | 1 | 0 | -2.558218 | 0.993901  | -2.202355 |
| 69 | 1 | 0 | -2.687592 | 4.724382  | -2.473436 |
| 70 | 1 | 0 | -1.411709 | 5.107173  | -1.315087 |
| 71 | 1 | 0 | -1.001065 | 4.389651  | -2.886708 |
| 72 | 1 | 0 | 0.145666  | 2.428257  | -1.908702 |
| 73 | 1 | 0 | 1.367768  | 0.747511  | 3.502894  |

-----  
*syn-cis-IM2*

Standard orientation:

| Center Number | Atomic Number | Atomic Type | Coordinates (Angstroms) |           |           |
|---------------|---------------|-------------|-------------------------|-----------|-----------|
|               |               |             | X                       | Y         | Z         |
| 1             | 1             | 0           | -1.202344               | -0.267908 | -1.051567 |
| 2             | 6             | 0           | 2.178821                | -1.728892 | -0.705139 |
| 3             | 8             | 0           | 3.311428                | -2.104353 | -1.395415 |
| 4             | 8             | 0           | 2.245143                | -0.867705 | 0.219818  |
| 5             | 6             | 0           | 1.031977                | -2.390119 | -1.183215 |
| 6             | 6             | 0           | -2.479624               | -2.463558 | 0.765344  |
| 7             | 6             | 0           | -1.318992               | -2.254264 | -0.028137 |
| 8             | 6             | 0           | -0.203368               | -2.307502 | -0.558044 |
| 9             | 1             | 0           | 1.161619                | -3.089285 | -2.002475 |
| 10            | 6             | 0           | 4.643604                | -2.082981 | -0.803539 |
| 11            | 6             | 0           | 5.172842                | -0.648409 | -0.676052 |
| 12            | 6             | 0           | 5.481282                | -2.864017 | -1.824273 |
| 13            | 6             | 0           | 4.637969                | -2.807559 | 0.550076  |
| 14            | 6             | 0           | -2.656032               | -1.789644 | 1.999720  |
| 15            | 6             | 0           | -3.801038               | -1.991916 | 2.768917  |
| 16            | 6             | 0           | -4.807172               | -2.865023 | 2.338347  |
| 17            | 6             | 0           | -4.645381               | -3.540529 | 1.122189  |
| 18            | 6             | 0           | -3.506059               | -3.345377 | 0.343983  |



|    |   |   |           |           |           |
|----|---|---|-----------|-----------|-----------|
| 19 | 1 | 0 | 6.232335  | -0.665618 | -0.394215 |
| 20 | 1 | 0 | 5.082048  | -0.126089 | -1.634618 |
| 21 | 1 | 0 | 4.614905  | -0.095749 | 0.078803  |
| 22 | 1 | 0 | 6.525309  | -2.920196 | -1.497751 |
| 23 | 1 | 0 | 5.094611  | -3.881169 | -1.939225 |
| 24 | 1 | 0 | 5.447714  | -2.372307 | -2.801825 |
| 25 | 1 | 0 | 5.661000  | -2.883420 | 0.935406  |
| 26 | 1 | 0 | 4.028578  | -2.271235 | 1.280569  |
| 27 | 1 | 0 | 4.238663  | -3.820854 | 0.437392  |
| 28 | 1 | 0 | -1.872910 | -1.123964 | 2.351194  |
| 29 | 1 | 0 | -3.905914 | -1.468375 | 3.716112  |
| 30 | 1 | 0 | -5.696588 | -3.021563 | 2.941641  |
| 31 | 1 | 0 | -5.413027 | -4.229427 | 0.778403  |
| 32 | 1 | 0 | -3.387610 | -3.877579 | -0.595164 |
| 33 | 6 | 0 | -1.611086 | 3.058946  | -1.391989 |
| 34 | 6 | 0 | -2.124692 | 1.640075  | -1.812337 |
| 35 | 7 | 0 | -0.855179 | 2.778348  | -0.171160 |
| 36 | 6 | 0 | -0.467728 | 1.470201  | -0.208653 |
| 37 | 7 | 0 | -1.187738 | 0.758706  | -1.070443 |
| 38 | 6 | 0 | 0.237684  | 3.551966  | 0.416584  |
| 39 | 6 | 0 | 0.961604  | 2.461847  | 1.266153  |
| 40 | 7 | 0 | 0.572214  | 1.208277  | 0.561923  |
| 41 | 1 | 0 | -2.424016 | 3.762397  | -1.204318 |
| 42 | 1 | 0 | -0.951846 | 3.485461  | -2.162791 |
| 43 | 6 | 0 | -3.635765 | 1.367728  | -1.552304 |
| 44 | 1 | 0 | -0.137303 | 4.370891  | 1.033388  |
| 45 | 1 | 0 | 0.887943  | 3.964998  | -0.369049 |
| 46 | 6 | 0 | 2.484309  | 2.658893  | 1.475153  |
| 47 | 1 | 0 | 1.135336  | 0.311488  | 0.510348  |
| 48 | 6 | 0 | -4.032377 | 1.646065  | -0.089976 |
| 49 | 6 | 0 | -3.943944 | -0.106579 | -1.887895 |
| 50 | 6 | 0 | -4.447039 | 2.273646  | -2.503793 |
| 51 | 6 | 0 | 3.263097  | 2.595269  | 0.147399  |
| 52 | 6 | 0 | 2.998962  | 1.564785  | 2.436004  |
| 53 | 6 | 0 | 2.691084  | 4.039135  | 2.136801  |
| 54 | 1 | 0 | -5.091861 | 1.411505  | 0.057936  |
| 55 | 1 | 0 | -3.461554 | 1.022067  | 0.604213  |
| 56 | 1 | 0 | -3.886659 | 2.695769  | 0.188087  |
| 57 | 1 | 0 | -5.027152 | -0.268164 | -1.899269 |
| 58 | 1 | 0 | -3.553282 | -0.390956 | -2.872261 |
| 59 | 1 | 0 | -3.527410 | -0.778955 | -1.134342 |
| 60 | 1 | 0 | -5.517833 | 2.086656  | -2.372598 |
| 61 | 1 | 0 | -4.279055 | 3.340401  | -2.316373 |
| 62 | 1 | 0 | -4.202207 | 2.071503  | -3.553674 |
| 63 | 1 | 0 | 3.115043  | 1.637437  | -0.357206 |
| 64 | 1 | 0 | 2.976508  | 3.399785  | -0.539584 |
| 65 | 1 | 0 | 4.334949  | 2.707141  | 0.343068  |
| 66 | 1 | 0 | 4.060706  | 1.728018  | 2.652045  |
| 67 | 1 | 0 | 2.458275  | 1.595086  | 3.389904  |
| 68 | 1 | 0 | 2.895172  | 0.564235  | 2.008500  |
| 69 | 1 | 0 | 3.750007  | 4.182172  | 2.375798  |
| 70 | 1 | 0 | 2.391416  | 4.863305  | 1.479073  |
| 71 | 1 | 0 | 2.126183  | 4.125001  | 3.073064  |
| 72 | 1 | 0 | 0.495518  | 2.442113  | 2.261919  |
| 73 | 1 | 0 | -1.950548 | 1.491407  | -2.883974 |

-----  
*syn-cis*-TS2

Standard orientation:

-----  
Center Atomic Atomic Coordinates (Angstroms)  
Number Number Type X Y Z

|    |   |   |           |           |           |
|----|---|---|-----------|-----------|-----------|
| 1  | 1 | 0 | -1.431135 | -0.506487 | -0.861542 |
| 2  | 6 | 0 | 2.473310  | -1.578054 | -0.737116 |
| 3  | 8 | 0 | 3.657852  | -2.048537 | -1.209957 |
| 4  | 8 | 0 | 2.393335  | -0.700046 | 0.135753  |
| 5  | 6 | 0 | 1.360729  | -2.228265 | -1.401521 |
| 6  | 6 | 0 | -1.906189 | -2.605170 | 0.494768  |
| 7  | 6 | 0 | -1.057409 | -1.883766 | -0.460552 |
| 8  | 6 | 0 | 0.110880  | -2.122160 | -0.916022 |
| 9  | 1 | 0 | 1.582633  | -2.849787 | -2.263674 |
| 10 | 6 | 0 | 4.963911  | -1.629182 | -0.690095 |
| 11 | 6 | 0 | 5.197915  | -0.139510 | -0.968398 |
| 12 | 6 | 0 | 5.938388  | -2.484552 | -1.507737 |
| 13 | 6 | 0 | 5.076709  | -1.966594 | 0.802205  |
| 14 | 6 | 0 | -2.195958 | -2.058057 | 1.760806  |
| 15 | 6 | 0 | -3.028668 | -2.727774 | 2.659730  |
| 16 | 6 | 0 | -3.608293 | -3.952253 | 2.312331  |
| 17 | 6 | 0 | -3.336641 | -4.502130 | 1.055091  |
| 18 | 6 | 0 | -2.497327 | -3.839519 | 0.157321  |
| 19 | 1 | 0 | 6.229726  | 0.125251  | -0.710890 |
| 20 | 1 | 0 | 5.046759  | 0.076642  | -2.031371 |
| 21 | 1 | 0 | 4.520413  | 0.481389  | -0.382624 |
| 22 | 1 | 0 | 6.970285  | -2.267395 | -1.212889 |
| 23 | 1 | 0 | 5.745399  | -3.549071 | -1.344044 |
| 24 | 1 | 0 | 5.829860  | -2.275996 | -2.576635 |
| 25 | 1 | 0 | 6.097280  | -1.764979 | 1.146278  |
| 26 | 1 | 0 | 4.380728  | -1.373447 | 1.396868  |
| 27 | 1 | 0 | 4.864638  | -3.027875 | 0.967909  |
| 28 | 1 | 0 | -1.745281 | -1.110519 | 2.043514  |
| 29 | 1 | 0 | -3.224742 | -2.290810 | 3.635753  |
| 30 | 1 | 0 | -4.259867 | -4.470138 | 3.010380  |
| 31 | 1 | 0 | -3.776427 | -5.455184 | 0.771938  |
| 32 | 1 | 0 | -2.289119 | -4.273227 | -0.816531 |
| 33 | 6 | 0 | -2.356988 | 2.966160  | -1.123441 |
| 34 | 6 | 0 | -2.700984 | 1.495391  | -1.556855 |
| 35 | 7 | 0 | -1.417998 | 2.754838  | -0.024652 |
| 36 | 6 | 0 | -0.894963 | 1.494718  | -0.176410 |
| 37 | 7 | 0 | -1.590665 | 0.702343  | -0.960269 |
| 38 | 6 | 0 | -0.357298 | 3.641381  | 0.440342  |
| 39 | 6 | 0 | 0.579738  | 2.638633  | 1.178299  |
| 40 | 7 | 0 | 0.265875  | 1.368286  | 0.479743  |
| 41 | 1 | 0 | -3.230336 | 3.534007  | -0.795777 |
| 42 | 1 | 0 | -1.873960 | 3.517218  | -1.945116 |
| 43 | 6 | 0 | -4.130418 | 1.000108  | -1.183083 |
| 44 | 1 | 0 | -0.739838 | 4.412987  | 1.112055  |
| 45 | 1 | 0 | 0.148578  | 4.129296  | -0.407783 |
| 46 | 6 | 0 | 2.083224  | 3.017222  | 1.224110  |
| 47 | 1 | 0 | 0.869370  | 0.538766  | 0.439832  |
| 48 | 6 | 0 | -4.377684 | 1.053492  | 0.335613  |
| 49 | 6 | 0 | -4.298631 | -0.448711 | -1.685910 |
| 50 | 6 | 0 | -5.162236 | 1.885865  | -1.915564 |
| 51 | 6 | 0 | 2.723914  | 3.015143  | -0.177206 |
| 52 | 6 | 0 | 2.821818  | 2.012851  | 2.135270  |
| 53 | 6 | 0 | 2.197597  | 4.425284  | 1.848087  |
| 54 | 1 | 0 | -5.389119 | 0.699559  | 0.563967  |
| 55 | 1 | 0 | -3.675515 | 0.410882  | 0.874080  |
| 56 | 1 | 0 | -4.286065 | 2.071703  | 0.730203  |
| 57 | 1 | 0 | -5.317879 | -0.799579 | -1.489363 |
| 58 | 1 | 0 | -4.125697 | -0.514380 | -2.767223 |
| 59 | 1 | 0 | -3.610465 | -1.136925 | -1.190431 |
| 60 | 1 | 0 | -6.172295 | 1.494295  | -1.753790 |
| 61 | 1 | 0 | -5.156847 | 2.922441  | -1.560543 |

|    |   |   |           |          |           |
|----|---|---|-----------|----------|-----------|
| 62 | 1 | 0 | -4.982372 | 1.897365 | -2.997805 |
| 63 | 1 | 0 | 2.645602  | 2.033568 | -0.651737 |
| 64 | 1 | 0 | 2.265518  | 3.755266 | -0.842689 |
| 65 | 1 | 0 | 3.787239  | 3.266171 | -0.097357 |
| 66 | 1 | 0 | 3.875573  | 2.298526 | 2.230237  |
| 67 | 1 | 0 | 2.388581  | 2.005895 | 3.142892  |
| 68 | 1 | 0 | 2.788186  | 0.996256 | 1.735871  |
| 69 | 1 | 0 | 3.251956  | 4.690058 | 1.980793  |
| 70 | 1 | 0 | 1.743801  | 5.196981 | 1.215884  |
| 71 | 1 | 0 | 1.719867  | 4.466629 | 2.834571  |
| 72 | 1 | 0 | 0.234217  | 2.556623 | 2.219949  |
| 73 | 1 | 0 | -2.619892 | 1.415114 | -2.647653 |

-----  
*syn-cis*-IM3

Standard orientation:

| Center<br>Number | Atomic<br>Number | Atomic<br>Type | Coordinates (Angstroms) |           |           |
|------------------|------------------|----------------|-------------------------|-----------|-----------|
|                  |                  |                | X                       | Y         | Z         |
| 1                | 1                | 0              | 1.235838                | 1.598526  | -0.874535 |
| 2                | 6                | 0              | -2.866414               | 1.002900  | -0.900879 |
| 3                | 8                | 0              | -4.079098               | 1.114231  | -1.477272 |
| 4                | 8                | 0              | -2.584498               | 0.231876  | 0.005402  |
| 5                | 6                | 0              | -1.916749               | 1.953491  | -1.536893 |
| 6                | 6                | 0              | 0.886450                | 3.325101  | 0.466738  |
| 7                | 6                | 0              | 0.481732                | 2.314523  | -0.530898 |
| 8                | 6                | 0              | -0.718395               | 2.155426  | -1.033021 |
| 9                | 1                | 0              | -2.257413               | 2.473474  | -2.429709 |
| 10               | 6                | 0              | -5.241835               | 0.302141  | -1.057381 |
| 11               | 6                | 0              | -4.956237               | -1.183633 | -1.300547 |
| 12               | 6                | 0              | -6.348751               | 0.801885  | -1.989926 |
| 13               | 6                | 0              | -5.586224               | 0.602340  | 0.405669  |
| 14               | 6                | 0              | 2.224401                | 3.364642  | 0.894194  |
| 15               | 6                | 0              | 2.646899                | 4.309083  | 1.832609  |
| 16               | 6                | 0              | 1.738326                | 5.229908  | 2.359824  |
| 17               | 6                | 0              | 0.402106                | 5.198790  | 1.941081  |
| 18               | 6                | 0              | -0.020611               | 4.256839  | 1.005390  |
| 19               | 1                | 0              | -5.867672               | -1.762123 | -1.114635 |
| 20               | 1                | 0              | -4.655443               | -1.349666 | -2.340149 |
| 21               | 1                | 0              | -4.169386               | -1.552263 | -0.641647 |
| 22               | 1                | 0              | -7.281791               | 0.268968  | -1.781010 |
| 23               | 1                | 0              | -6.520786               | 1.873028  | -1.847320 |
| 24               | 1                | 0              | -6.078441               | 0.631579  | -3.036476 |
| 25               | 1                | 0              | -6.522770               | 0.097951  | 0.666939  |
| 26               | 1                | 0              | -4.802839               | 0.254980  | 1.080586  |
| 27               | 1                | 0              | -5.728742               | 1.678200  | 0.551051  |
| 28               | 1                | 0              | 2.933790                | 2.650726  | 0.486511  |
| 29               | 1                | 0              | 3.685761                | 4.324046  | 2.150218  |
| 30               | 1                | 0              | 2.065253                | 5.965636  | 3.089068  |
| 31               | 1                | 0              | -0.310955               | 5.911437  | 2.346453  |
| 32               | 1                | 0              | -1.058779               | 4.238120  | 0.685489  |
| 33               | 6                | 0              | 3.228727                | -2.732798 | -0.847006 |
| 34               | 6                | 0              | 3.202484                | -1.348081 | -1.597454 |
| 35               | 7                | 0              | 2.279312                | -2.487473 | 0.230633  |
| 36               | 6                | 0              | 1.476339                | -1.437513 | -0.216732 |
| 37               | 7                | 0              | 1.932247                | -0.700533 | -1.174844 |
| 38               | 6                | 0              | 1.435278                | -3.460965 | 0.905706  |
| 39               | 6                | 0              | 0.310597                | -2.544966 | 1.468317  |
| 40               | 7                | 0              | 0.288960                | -1.477121 | 0.455005  |
| 41               | 1                | 0              | 4.213564                | -3.010578 | -0.461879 |
| 42               | 1                | 0              | 2.876781                | -3.544133 | -1.506352 |

|    |   |   |           |           |           |
|----|---|---|-----------|-----------|-----------|
| 43 | 6 | 0 | 4.464548  | -0.454010 | -1.384755 |
| 44 | 1 | 0 | 1.970251  | -3.987332 | 1.700591  |
| 45 | 1 | 0 | 1.033285  | -4.206774 | 0.198351  |
| 46 | 6 | 0 | -1.060921 | -3.222201 | 1.737714  |
| 47 | 1 | 0 | -0.381898 | -0.718882 | 0.438244  |
| 48 | 6 | 0 | 4.694321  | -0.144062 | 0.106255  |
| 49 | 6 | 0 | 4.266924  | 0.864324  | -2.160186 |
| 50 | 6 | 0 | 5.702815  | -1.170505 | -1.964263 |
| 51 | 6 | 0 | -1.736455 | -3.704820 | 0.439952  |
| 52 | 6 | 0 | -1.984166 | -2.207225 | 2.446602  |
| 53 | 6 | 0 | -0.829043 | -4.420563 | 2.682517  |
| 54 | 1 | 0 | 5.552377  | 0.527746  | 0.229871  |
| 55 | 1 | 0 | 3.815726  | 0.339755  | 0.544076  |
| 56 | 1 | 0 | 4.897682  | -1.050964 | 0.686200  |
| 57 | 1 | 0 | 5.150048  | 1.506500  | -2.058112 |
| 58 | 1 | 0 | 4.112441  | 0.673394  | -3.229105 |
| 59 | 1 | 0 | 3.395765  | 1.412669  | -1.794572 |
| 60 | 1 | 0 | 6.584677  | -0.522793 | -1.896258 |
| 61 | 1 | 0 | 5.938914  | -2.097107 | -1.429299 |
| 62 | 1 | 0 | 5.556565  | -1.420735 | -3.022497 |
| 63 | 1 | 0 | -1.889320 | -2.876719 | -0.257440 |
| 64 | 1 | 0 | -1.145377 | -4.471805 | -0.072188 |
| 65 | 1 | 0 | -2.713677 | -4.144552 | 0.670572  |
| 66 | 1 | 0 | -2.935612 | -2.683436 | 2.711309  |
| 67 | 1 | 0 | -1.527194 | -1.841261 | 3.374252  |
| 68 | 1 | 0 | -2.211570 | -1.346456 | 1.811881  |
| 69 | 1 | 0 | -1.787819 | -4.864311 | 2.972630  |
| 70 | 1 | 0 | -0.232414 | -5.207945 | 2.208558  |
| 71 | 1 | 0 | -0.315992 | -4.111455 | 3.601567  |
| 72 | 1 | 0 | 0.662284  | -2.138244 | 2.431432  |
| 73 | 1 | 0 | 3.143149  | -1.530470 | -2.679003 |

*syn-cis*-COM

Standard orientation:

| Center Number | Atomic Number | Atomic Type | Coordinates (Angstroms) |           |           |
|---------------|---------------|-------------|-------------------------|-----------|-----------|
|               |               |             | X                       | Y         | Z         |
| 1             | 6             | 0           | 0.644433                | -1.775577 | -0.578568 |
| 2             | 8             | 0           | 1.571374                | -2.575363 | -0.057499 |
| 3             | 8             | 0           | -0.514441               | -2.095204 | -0.811487 |
| 4             | 6             | 0           | 1.151452                | -0.366523 | -0.872040 |
| 5             | 6             | 0           | 5.101355                | 0.489312  | -0.170069 |
| 6             | 6             | 0           | 3.727500                | 0.176949  | -0.418507 |
| 7             | 6             | 0           | 2.561620                | -0.094380 | -0.619379 |
| 8             | 1             | 0           | 0.904945                | -0.171039 | -1.923794 |
| 9             | 6             | 0           | 1.298381                | -3.982299 | 0.329639  |
| 10            | 6             | 0           | 5.590357                | 0.572190  | 1.149889  |
| 11            | 6             | 0           | 6.929654                | 0.878926  | 1.389579  |
| 12            | 6             | 0           | 7.803716                | 1.109698  | 0.322120  |
| 13            | 6             | 0           | 7.328485                | 1.030649  | -0.991132 |
| 14            | 6             | 0           | 5.990893                | 0.722741  | -1.238715 |
| 15            | 1             | 0           | 4.909679                | 0.395612  | 1.976836  |
| 16            | 1             | 0           | 7.291681                | 0.939672  | 2.412181  |
| 17            | 1             | 0           | 8.845897                | 1.349986  | 0.512081  |
| 18            | 1             | 0           | 8.001458                | 1.209552  | -1.825110 |
| 19            | 1             | 0           | 5.620718                | 0.661382  | -2.257360 |
| 20            | 6             | 0           | 0.888016                | -4.790180 | -0.905786 |
| 21            | 1             | 0           | -0.078382               | -4.465832 | -1.294431 |
| 22            | 1             | 0           | 0.819691                | -5.849445 | -0.635717 |
| 23            | 1             | 0           | 1.640783                | -4.690140 | -1.694498 |

|    |   |   |           |           |           |
|----|---|---|-----------|-----------|-----------|
| 24 | 6 | 0 | 2.657924  | -4.444845 | 0.858815  |
| 25 | 1 | 0 | 2.594043  | -5.487023 | 1.187531  |
| 26 | 1 | 0 | 2.971728  | -3.829838 | 1.707333  |
| 27 | 1 | 0 | 3.421892  | -4.370878 | 0.079388  |
| 28 | 6 | 0 | 0.239657  | -4.017086 | 1.436327  |
| 29 | 1 | 0 | 0.541530  | -3.380549 | 2.274229  |
| 30 | 1 | 0 | 0.141193  | -5.042780 | 1.807769  |
| 31 | 1 | 0 | -0.732787 | -3.684120 | 1.071104  |
| 32 | 1 | 0 | 0.505959  | 0.320687  | -0.294471 |
| 33 | 6 | 0 | -3.147571 | 3.005512  | 0.994587  |
| 34 | 6 | 0 | -1.577224 | 2.972685  | 0.861958  |
| 35 | 7 | 0 | -3.523743 | 1.877730  | 0.150416  |
| 36 | 6 | 0 | -2.393711 | 1.065533  | 0.097328  |
| 37 | 7 | 0 | -1.258892 | 1.589484  | 0.421075  |
| 38 | 6 | 0 | -4.697754 | 1.023380  | 0.261084  |
| 39 | 6 | 0 | -4.214439 | -0.251225 | -0.493646 |
| 40 | 7 | 0 | -2.768884 | -0.203777 | -0.232844 |
| 41 | 1 | 0 | -3.601880 | 3.938148  | 0.649327  |
| 42 | 1 | 0 | -5.577283 | 1.469970  | -0.210366 |
| 43 | 1 | 0 | -2.097891 | -0.869790 | -0.604893 |
| 44 | 6 | 0 | -4.885794 | -1.595162 | -0.097520 |
| 45 | 6 | 0 | -6.405082 | -1.467711 | -0.333073 |
| 46 | 1 | 0 | -6.626010 | -1.176469 | -1.367276 |
| 47 | 1 | 0 | -6.859578 | -0.725299 | 0.332586  |
| 48 | 1 | 0 | -6.902000 | -2.425880 | -0.145071 |
| 49 | 6 | 0 | -4.614388 | -1.973812 | 1.371068  |
| 50 | 1 | 0 | -5.047941 | -2.956591 | 1.588722  |
| 51 | 1 | 0 | -5.059686 | -1.258594 | 2.070813  |
| 52 | 1 | 0 | -3.540776 | -2.019526 | 1.575259  |
| 53 | 6 | 0 | -4.330439 | -2.705798 | -1.016028 |
| 54 | 1 | 0 | -4.498404 | -2.465962 | -2.073081 |
| 55 | 1 | 0 | -4.830444 | -3.658512 | -0.807155 |
| 56 | 1 | 0 | -3.255935 | -2.857632 | -0.870202 |
| 57 | 6 | 0 | -0.960202 | 4.075531  | -0.055362 |
| 58 | 6 | 0 | -1.237259 | 5.463268  | 0.560677  |
| 59 | 1 | 0 | -0.748674 | 6.247040  | -0.029831 |
| 60 | 1 | 0 | -0.846683 | 5.527629  | 1.584051  |
| 61 | 1 | 0 | -2.306672 | 5.700074  | 0.593587  |
| 62 | 6 | 0 | 0.566412  | 3.864482  | -0.112132 |
| 63 | 1 | 0 | 1.008648  | 3.894185  | 0.891188  |
| 64 | 1 | 0 | 1.039851  | 4.652089  | -0.710559 |
| 65 | 1 | 0 | 0.815143  | 2.897541  | -0.555839 |
| 66 | 6 | 0 | -1.532897 | 4.017426  | -1.484204 |
| 67 | 1 | 0 | -2.612724 | 4.201489  | -1.501202 |
| 68 | 1 | 0 | -1.350348 | 3.038383  | -1.938207 |
| 69 | 1 | 0 | -1.056362 | 4.776879  | -2.115578 |
| 70 | 1 | 0 | -1.132008 | 3.122855  | 1.854574  |
| 71 | 1 | 0 | -4.410336 | -0.098960 | -1.568887 |
| 72 | 1 | 0 | -4.938137 | 0.802256  | 1.314971  |
| 73 | 1 | 0 | -3.457299 | 2.837799  | 2.039887  |

-----  
*syn-cis*-TS1

Standard orientation:

| Center<br>Number | Atomic<br>Number | Atomic<br>Type | Coordinates (Angstroms) |           |           |
|------------------|------------------|----------------|-------------------------|-----------|-----------|
|                  |                  |                | X                       | Y         | Z         |
| 1                | 6                | 0              | -1.305086               | -2.132001 | 0.382314  |
| 2                | 8                | 0              | -2.178086               | -2.840100 | 1.151487  |
| 3                | 8                | 0              | -1.665142               | -1.654633 | -0.703710 |
| 4                | 6                | 0              | -0.024756               | -1.922715 | 1.043046  |

|    |   |   |           |           |           |
|----|---|---|-----------|-----------|-----------|
| 5  | 6 | 0 | 3.387050  | -1.555570 | -1.157259 |
| 6  | 6 | 0 | 2.182560  | -1.682761 | -0.404307 |
| 7  | 6 | 0 | 1.149262  | -1.822549 | 0.230901  |
| 8  | 1 | 0 | 0.096661  | -2.529808 | 1.941641  |
| 9  | 6 | 0 | -3.515156 | -2.963480 | 0.646015  |
| 10 | 6 | 0 | 3.380814  | -1.678880 | -2.564821 |
| 11 | 6 | 0 | 4.561383  | -1.552120 | -3.296216 |
| 12 | 6 | 0 | 5.776605  | -1.307299 | -2.647385 |
| 13 | 6 | 0 | 5.798239  | -1.190276 | -1.253248 |
| 14 | 6 | 0 | 4.621179  | -1.309223 | -0.514854 |
| 15 | 1 | 0 | 2.441801  | -1.881145 | -3.070167 |
| 16 | 1 | 0 | 4.533738  | -1.651848 | -4.378189 |
| 17 | 1 | 0 | 6.695054  | -1.213658 | -3.220033 |
| 18 | 1 | 0 | 6.737002  | -1.004696 | -0.737937 |
| 19 | 1 | 0 | 4.641629  | -1.217903 | 0.566951  |
| 20 | 1 | 0 | -0.216220 | -0.553794 | 1.495712  |
| 21 | 6 | 0 | 0.014183  | 3.042651  | 2.069008  |
| 22 | 6 | 0 | 0.296005  | 1.579852  | 2.648671  |
| 23 | 7 | 0 | -0.337254 | 2.754667  | 0.697439  |
| 24 | 6 | 0 | -0.605302 | 1.412758  | 0.585241  |
| 25 | 7 | 0 | -0.365744 | 0.694700  | 1.657296  |
| 26 | 6 | 0 | -0.751720 | 3.478860  | -0.481535 |
| 27 | 6 | 0 | -1.020592 | 2.292998  | -1.504257 |
| 28 | 7 | 0 | -1.010061 | 1.094475  | -0.645579 |
| 29 | 1 | 0 | 0.875744  | 3.702774  | 2.118201  |
| 30 | 1 | 0 | 0.038438  | 4.137584  | -0.838940 |
| 31 | 1 | 0 | -1.287639 | 0.138808  | -0.898378 |
| 32 | 6 | 0 | -2.322763 | 2.427301  | -2.368012 |
| 33 | 6 | 0 | -3.613539 | 2.339264  | -1.495309 |
| 34 | 1 | 0 | -3.649911 | 1.386178  | -0.964777 |
| 35 | 1 | 0 | -4.498853 | 2.416212  | -2.129881 |
| 36 | 1 | 0 | -3.642404 | 3.148166  | -0.764845 |
| 37 | 6 | 0 | -2.312505 | 3.781848  | -3.143750 |
| 38 | 1 | 0 | -2.359692 | 4.622713  | -2.450607 |
| 39 | 1 | 0 | -3.173004 | 3.839328  | -3.813178 |
| 40 | 1 | 0 | -1.400740 | 3.867567  | -3.737932 |
| 41 | 6 | 0 | -2.360611 | 1.274829  | -3.422207 |
| 42 | 1 | 0 | -2.419061 | 0.304212  | -2.928160 |
| 43 | 1 | 0 | -1.461905 | 1.299782  | -4.041283 |
| 44 | 1 | 0 | -3.232864 | 1.384744  | -4.069672 |
| 45 | 6 | 0 | 1.819232  | 1.283652  | 2.912098  |
| 46 | 6 | 0 | 1.999990  | -0.157677 | 3.483766  |
| 47 | 1 | 0 | 1.341118  | -0.310937 | 4.340350  |
| 48 | 1 | 0 | 3.032227  | -0.309622 | 3.806491  |
| 49 | 1 | 0 | 1.773102  | -0.903338 | 2.727386  |
| 50 | 6 | 0 | 2.373588  | 2.260382  | 4.000506  |
| 51 | 1 | 0 | 1.777848  | 2.184160  | 4.912097  |
| 52 | 1 | 0 | 2.347432  | 3.292511  | 3.651215  |
| 53 | 1 | 0 | 3.409244  | 2.008948  | 4.239325  |
| 54 | 6 | 0 | 2.677823  | 1.431288  | 1.618143  |
| 55 | 1 | 0 | 2.275609  | 0.805965  | 0.822537  |
| 56 | 1 | 0 | 3.707989  | 1.127558  | 1.813963  |
| 57 | 1 | 0 | 2.683241  | 2.466988  | 1.275822  |
| 58 | 1 | 0 | -0.245638 | 1.480429  | 3.594042  |
| 59 | 1 | 0 | -0.155110 | 2.227193  | -2.171428 |
| 60 | 1 | 0 | -0.835352 | 3.492047  | 2.585587  |
| 61 | 1 | 0 | -1.653732 | 4.047573  | -0.263862 |
| 62 | 6 | 0 | -3.521142 | -3.691707 | -0.710911 |
| 63 | 1 | 0 | -4.384139 | -4.321105 | -0.774110 |
| 64 | 1 | 0 | -3.546119 | -2.971679 | -1.502009 |
| 65 | 1 | 0 | -2.637328 | -4.288313 | -0.799415 |
| 66 | 6 | 0 | -4.167731 | -1.579331 | 0.473159  |

|    |   |   |           |           |           |
|----|---|---|-----------|-----------|-----------|
| 67 | 1 | 0 | -5.211115 | -1.645997 | 0.700765  |
| 68 | 1 | 0 | -3.702060 | -0.880191 | 1.135921  |
| 69 | 1 | 0 | -4.043429 | -1.250091 | -0.537311 |
| 70 | 6 | 0 | -4.276388 | -3.787177 | 1.701311  |
| 71 | 1 | 0 | -4.255557 | -3.272034 | 2.638911  |
| 72 | 1 | 0 | -5.291273 | -3.917172 | 1.388249  |
| 73 | 1 | 0 | -3.811239 | -4.744634 | 1.809998  |

-----  
*syn-cis-IM1*

Standard orientation:

| Center<br>Number | Atomic<br>Number | Atomic<br>Type | Coordinates (Angstroms) |           |           |
|------------------|------------------|----------------|-------------------------|-----------|-----------|
|                  |                  |                | X                       | Y         | Z         |
| 1                | 6                | 0              | -0.013524               | 1.885390  | -0.574898 |
| 2                | 8                | 0              | -0.719737               | 2.772533  | 0.179410  |
| 3                | 8                | 0              | 1.240084                | 2.032958  | -0.750415 |
| 4                | 6                | 0              | -0.768062               | 0.814967  | -1.097776 |
| 5                | 6                | 0              | -4.736680               | 0.186317  | -0.594359 |
| 6                | 6                | 0              | -3.348283               | 0.416675  | -0.775819 |
| 7                | 6                | 0              | -2.151187               | 0.637914  | -0.925206 |
| 8                | 1                | 0              | -0.272176               | 0.239541  | -1.876624 |
| 9                | 6                | 0              | -0.118412               | 3.925822  | 0.843437  |
| 10               | 6                | 0              | -5.477948               | 0.921142  | 0.362920  |
| 11               | 6                | 0              | -6.841037               | 0.692169  | 0.540723  |
| 12               | 6                | 0              | -7.509386               | -0.272852 | -0.222515 |
| 13               | 6                | 0              | -6.790285               | -1.006273 | -1.173613 |
| 14               | 6                | 0              | -5.427097               | -0.783196 | -1.361510 |
| 15               | 1                | 0              | -4.965951               | 1.671908  | 0.957026  |
| 16               | 1                | 0              | -7.386999               | 1.272056  | 1.280814  |
| 17               | 1                | 0              | -8.572014               | -0.447887 | -0.080747 |
| 18               | 1                | 0              | -7.296455               | -1.755558 | -1.777370 |
| 19               | 1                | 0              | -4.878490               | -1.350708 | -2.107498 |
| 20               | 6                | 0              | 0.487638                | 4.889804  | -0.186222 |
| 21               | 1                | 0              | 1.342736                | 4.438980  | -0.691392 |
| 22               | 1                | 0              | 0.811567                | 5.809060  | 0.315464  |
| 23               | 1                | 0              | -0.263107               | 5.157271  | -0.937120 |
| 24               | 6                | 0              | -1.322892               | 4.577255  | 1.534667  |
| 25               | 1                | 0              | -1.008645               | 5.474405  | 2.078557  |
| 26               | 1                | 0              | -1.781832               | 3.880497  | 2.242944  |
| 27               | 1                | 0              | -2.078694               | 4.861118  | 0.796359  |
| 28               | 6                | 0              | 0.911355                | 3.477169  | 1.890710  |
| 29               | 1                | 0              | 0.459657                | 2.754255  | 2.579006  |
| 30               | 1                | 0              | 1.243803                | 4.341766  | 2.476782  |
| 31               | 1                | 0              | 1.779718                | 3.019441  | 1.415092  |
| 32               | 1                | 0              | -0.064782               | -0.709227 | 0.255602  |
| 33               | 6                | 0              | 2.076012                | -3.108100 | 1.290044  |
| 34               | 6                | 0              | 0.571648                | -2.665613 | 1.213897  |
| 35               | 7                | 0              | 2.701003                | -2.300889 | 0.240574  |
| 36               | 6                | 0              | 1.912247                | -1.211058 | 0.024905  |
| 37               | 7                | 0              | 0.692607                | -1.352112 | 0.535913  |
| 38               | 6                | 0              | 4.094314                | -1.868056 | 0.099891  |
| 39               | 6                | 0              | 3.937805                | -0.612556 | -0.822573 |
| 40               | 7                | 0              | 2.529836                | -0.218248 | -0.579742 |
| 41               | 1                | 0              | 2.212178                | -4.175284 | 1.106045  |
| 42               | 1                | 0              | 4.711609                | -2.641647 | -0.361038 |
| 43               | 1                | 0              | 2.047270                | 0.728779  | -0.768801 |
| 44               | 6                | 0              | 4.957204                | 0.537937  | -0.611722 |
| 45               | 6                | 0              | 6.374410                | -0.035822 | -0.821260 |
| 46               | 1                | 0              | 6.475308                | -0.504300 | -1.807780 |
| 47               | 1                | 0              | 6.634044                | -0.781945 | -0.061060 |

|    |   |   |           |           |           |
|----|---|---|-----------|-----------|-----------|
| 48 | 1 | 0 | 7.118084  | 0.765522  | -0.758942 |
| 49 | 6 | 0 | 4.844894  | 1.161641  | 0.792899  |
| 50 | 1 | 0 | 5.559287  | 1.986418  | 0.888229  |
| 51 | 1 | 0 | 5.072971  | 0.443236  | 1.588572  |
| 52 | 1 | 0 | 3.844090  | 1.565165  | 0.971610  |
| 53 | 6 | 0 | 4.691001  | 1.627801  | -1.673623 |
| 54 | 1 | 0 | 4.758731  | 1.216611  | -2.687985 |
| 55 | 1 | 0 | 5.438711  | 2.423869  | -1.587670 |
| 56 | 1 | 0 | 3.703737  | 2.084233  | -1.554770 |
| 57 | 6 | 0 | -0.409457 | -3.656035 | 0.518452  |
| 58 | 6 | 0 | -0.468704 | -4.949495 | 1.358834  |
| 59 | 1 | 0 | -1.215438 | -5.632182 | 0.940394  |
| 60 | 1 | 0 | -0.759245 | -4.739400 | 2.395320  |
| 61 | 1 | 0 | 0.486869  | -5.485421 | 1.375656  |
| 62 | 6 | 0 | -1.815333 | -3.019484 | 0.501403  |
| 63 | 1 | 0 | -2.152284 | -2.769871 | 1.514627  |
| 64 | 1 | 0 | -2.540565 | -3.722514 | 0.078269  |
| 65 | 1 | 0 | -1.860507 | -2.106797 | -0.100297 |
| 66 | 6 | 0 | 0.028358  | -3.983909 | -0.921610 |
| 67 | 1 | 0 | 1.010925  | -4.467780 | -0.955665 |
| 68 | 1 | 0 | 0.070138  | -3.083555 | -1.542690 |
| 69 | 1 | 0 | -0.691865 | -4.668103 | -1.382861 |
| 70 | 1 | 0 | 0.193071  | -2.496011 | 2.228031  |
| 71 | 1 | 0 | 4.028627  | -0.942223 | -1.867889 |
| 72 | 1 | 0 | 4.521848  | -1.610303 | 1.080500  |
| 73 | 1 | 0 | 2.505577  | -2.865900 | 2.273669  |

-----  
*syn-cis*-TSR

Standard orientation:

| Center<br>Number | Atomic<br>Number | Atomic<br>Type | Coordinates (Angstroms) |          |           |
|------------------|------------------|----------------|-------------------------|----------|-----------|
|                  |                  |                | X                       | Y        | Z         |
| 1                | 6                | 0              | 1.219896                | 2.213379 | -1.018785 |
| 2                | 8                | 0              | 0.763442                | 3.001650 | 0.011083  |
| 3                | 8                | 0              | 2.422407                | 2.185393 | -1.351020 |
| 4                | 6                | 0              | 0.201825                | 1.411486 | -1.618842 |
| 5                | 6                | 0              | -3.631849               | 1.310352 | -0.371543 |
| 6                | 6                | 0              | -2.261430               | 1.209975 | -0.739253 |
| 7                | 6                | 0              | -1.117527               | 1.356245 | -1.183744 |
| 8                | 1                | 0              | 0.467343                | 0.960657 | -2.572078 |
| 9                | 6                | 0              | 1.582994                | 4.042051 | 0.622766  |
| 10               | 6                | 0              | -4.010171               | 1.833433 | 0.889901  |
| 11               | 6                | 0              | -5.352539               | 1.927680 | 1.253158  |
| 12               | 6                | 0              | -6.361406               | 1.498296 | 0.381997  |
| 13               | 6                | 0              | -6.003574               | 0.979420 | -0.868127 |
| 14               | 6                | 0              | -4.664330               | 0.885896 | -1.243660 |
| 15               | 1                | 0              | -3.234146               | 2.172699 | 1.569667  |
| 16               | 1                | 0              | -5.613997               | 2.341214 | 2.224132  |
| 17               | 1                | 0              | -7.406272               | 1.572823 | 0.669070  |
| 18               | 1                | 0              | -6.775204               | 0.651709 | -1.560536 |
| 19               | 1                | 0              | -4.398325               | 0.495503 | -2.221613 |
| 20               | 6                | 0              | 2.037419                | 5.056966 | -0.436179 |
| 21               | 1                | 0              | 2.722717                | 4.596958 | -1.150083 |
| 22               | 1                | 0              | 2.543650                | 5.898813 | 0.050297  |
| 23               | 1                | 0              | 1.170738                | 5.447433 | -0.979843 |
| 24               | 6                | 0              | 0.610735                | 4.701202 | 1.609334  |
| 25               | 1                | 0              | 1.107513                | 5.516851 | 2.145879  |
| 26               | 1                | 0              | 0.252362                | 3.969708 | 2.340889  |
| 27               | 1                | 0              | -0.256176               | 5.106287 | 1.078893  |
| 28               | 6                | 0              | 2.775186                | 3.438512 | 1.379101  |



|    |   |   |           |           |           |
|----|---|---|-----------|-----------|-----------|
| 29 | 1 | 0 | 2.427125  | 2.679244  | 2.088901  |
| 30 | 1 | 0 | 3.288492  | 4.222575  | 1.948204  |
| 31 | 1 | 0 | 3.482984  | 2.981375  | 0.686816  |
| 32 | 1 | 0 | -0.957226 | -0.567418 | -0.124625 |
| 33 | 6 | 0 | 0.107633  | -3.368055 | 1.391969  |
| 34 | 6 | 0 | -1.135381 | -2.553857 | 0.900446  |
| 35 | 7 | 0 | 1.151115  | -2.923193 | 0.467823  |
| 36 | 6 | 0 | 0.803421  | -1.694150 | -0.001376 |
| 37 | 7 | 0 | -0.482626 | -1.429404 | 0.178553  |
| 38 | 6 | 0 | 2.606531  | -2.960590 | 0.618094  |
| 39 | 6 | 0 | 3.051874  | -1.891042 | -0.424121 |
| 40 | 7 | 0 | 1.844169  | -1.022200 | -0.474189 |
| 41 | 1 | 0 | -0.044105 | -4.446753 | 1.329967  |
| 42 | 1 | 0 | 3.008496  | -3.949083 | 0.388854  |
| 43 | 1 | 0 | 1.734053  | -0.131723 | -0.968359 |
| 44 | 6 | 0 | 4.383590  | -1.152826 | -0.134873 |
| 45 | 6 | 0 | 5.483768  | -2.224435 | 0.028645  |
| 46 | 1 | 0 | 5.543121  | -2.877413 | -0.850777 |
| 47 | 1 | 0 | 5.324700  | -2.853130 | 0.912772  |
| 48 | 1 | 0 | 6.458504  | -1.739792 | 0.144495  |
| 49 | 6 | 0 | 4.301010  | -0.286713 | 1.135800  |
| 50 | 1 | 0 | 5.259230  | 0.217964  | 1.298156  |
| 51 | 1 | 0 | 4.091208  | -0.880028 | 2.033383  |
| 52 | 1 | 0 | 3.533560  | 0.485379  | 1.043406  |
| 53 | 6 | 0 | 4.727280  | -0.258840 | -1.346409 |
| 54 | 1 | 0 | 4.797532  | -0.854238 | -2.265396 |
| 55 | 1 | 0 | 5.700680  | 0.219015  | -1.188961 |
| 56 | 1 | 0 | 3.992174  | 0.538494  | -1.497376 |
| 57 | 6 | 0 | -2.165339 | -3.350832 | 0.043028  |
| 58 | 6 | 0 | -2.830906 | -4.405067 | 0.953714  |
| 59 | 1 | 0 | -3.601750 | -4.946705 | 0.395778  |
| 60 | 1 | 0 | -3.318353 | -3.935595 | 1.816495  |
| 61 | 1 | 0 | -2.120082 | -5.150001 | 1.329163  |
| 62 | 6 | 0 | -3.252107 | -2.380936 | -0.459748 |
| 63 | 1 | 0 | -3.735378 | -1.846956 | 0.365360  |
| 64 | 1 | 0 | -4.029057 | -2.935811 | -0.996252 |
| 65 | 1 | 0 | -2.846772 | -1.631496 | -1.144901 |
| 66 | 6 | 0 | -1.500977 | -4.041339 | -1.163731 |
| 67 | 1 | 0 | -0.753213 | -4.782922 | -0.861840 |
| 68 | 1 | 0 | -1.015181 | -3.314391 | -1.822458 |
| 69 | 1 | 0 | -2.260119 | -4.564261 | -1.755009 |
| 70 | 1 | 0 | -1.673073 | -2.138917 | 1.759202  |
| 71 | 1 | 0 | 3.153823  | -2.386026 | -1.400918 |
| 72 | 1 | 0 | 2.898459  | -2.682843 | 1.641628  |
| 73 | 1 | 0 | 0.370814  | -3.109244 | 2.428428  |

*syn-cis-IM2*

Standard orientation:

| Center<br>Number | Atomic<br>Number | Atomic<br>Type | Coordinates (Angstroms) |           |           |
|------------------|------------------|----------------|-------------------------|-----------|-----------|
|                  |                  |                | X                       | Y         | Z         |
| 1                | 6                | 0              | -0.568988               | -3.366178 | 1.475974  |
| 2                | 6                | 0              | -1.685365               | -2.321303 | 1.131336  |
| 3                | 7                | 0              | 0.426303                | -3.115695 | 0.432225  |
| 4                | 6                | 0              | 0.259332                | -1.836829 | -0.003763 |
| 5                | 7                | 0              | -0.924544               | -1.336807 | 0.320198  |
| 6                | 6                | 0              | 1.861792                | -3.407615 | 0.425490  |
| 7                | 6                | 0              | 2.374596                | -2.412771 | -0.662662 |
| 8                | 7                | 0              | 1.334247                | -1.352043 | -0.602194 |
| 9                | 1                | 0              | -0.930055               | -4.395376 | 1.443137  |

|    |   |   |           |           |           |
|----|---|---|-----------|-----------|-----------|
| 10 | 1 | 0 | -0.142421 | -3.176553 | 2.472317  |
| 11 | 6 | 0 | -2.950977 | -2.891292 | 0.421997  |
| 12 | 1 | 0 | 2.058686  | -4.447232 | 0.157346  |
| 13 | 1 | 0 | 2.304478  | -3.201463 | 1.411156  |
| 14 | 6 | 0 | 3.833615  | -1.911030 | -0.511378 |
| 15 | 6 | 0 | 4.036937  | -1.091034 | 0.776515  |
| 16 | 6 | 0 | 4.191943  | -1.040791 | -1.735887 |
| 17 | 6 | 0 | 4.750646  | -3.153748 | -0.491604 |
| 18 | 6 | 0 | -3.891516 | -1.721812 | 0.071424  |
| 19 | 6 | 0 | -3.677939 | -3.826775 | 1.411820  |
| 20 | 6 | 0 | -2.592405 | -3.661253 | -0.863579 |
| 21 | 1 | 0 | 5.070297  | -0.732184 | 0.823547  |
| 22 | 1 | 0 | 3.386063  | -0.213528 | 0.802685  |
| 23 | 1 | 0 | 3.857044  | -1.683625 | 1.681098  |
| 24 | 1 | 0 | 5.255522  | -0.780323 | -1.706265 |
| 25 | 1 | 0 | 4.009983  | -1.583251 | -2.672000 |
| 26 | 1 | 0 | 3.640056  | -0.095714 | -1.759357 |
| 27 | 1 | 0 | 5.799445  | -2.841728 | -0.460585 |
| 28 | 1 | 0 | 4.571878  | -3.786385 | 0.385807  |
| 29 | 1 | 0 | 4.615043  | -3.767392 | -1.390566 |
| 30 | 1 | 0 | -4.823632 | -2.104854 | -0.357207 |
| 31 | 1 | 0 | -4.152220 | -1.131485 | 0.957232  |
| 32 | 1 | 0 | -3.448808 | -1.042586 | -0.661384 |
| 33 | 1 | 0 | -4.608101 | -4.192242 | 0.964528  |
| 34 | 1 | 0 | -3.080560 | -4.705523 | 1.679707  |
| 35 | 1 | 0 | -3.942183 | -3.300968 | 2.337232  |
| 36 | 1 | 0 | -3.506277 | -4.024602 | -1.345627 |
| 37 | 1 | 0 | -2.074429 | -3.018128 | -1.582194 |
| 38 | 1 | 0 | -1.957638 | -4.531936 | -0.665379 |
| 39 | 1 | 0 | -1.246583 | -0.400333 | 0.010202  |
| 40 | 1 | 0 | 2.297430  | -2.907839 | -1.641746 |
| 41 | 1 | 0 | -2.019986 | -1.824220 | 2.048259  |
| 42 | 1 | 0 | 1.338725  | -0.399605 | -1.036517 |
| 43 | 6 | 0 | 1.925520  | 2.147777  | -0.907309 |
| 44 | 8 | 0 | 1.518041  | 2.694019  | 0.286431  |
| 45 | 8 | 0 | 3.093880  | 2.217705  | -1.306889 |
| 46 | 6 | 0 | 0.865010  | 1.457372  | -1.602203 |
| 47 | 6 | 0 | -3.002368 | 1.865589  | -0.630842 |
| 48 | 6 | 0 | -1.647720 | 1.457020  | -0.839204 |
| 49 | 6 | 0 | -0.469606 | 1.516995  | -1.225343 |
| 50 | 1 | 0 | 1.104306  | 1.192785  | -2.630235 |
| 51 | 6 | 0 | 2.370986  | 3.595391  | 1.058030  |
| 52 | 6 | 0 | -3.971588 | 1.742743  | -1.655056 |
| 53 | 6 | 0 | -5.294246 | 2.128243  | -1.439833 |
| 54 | 6 | 0 | -5.695790 | 2.645551  | -0.202565 |
| 55 | 6 | 0 | -4.747859 | 2.774311  | 0.819565  |
| 56 | 6 | 0 | -3.423843 | 2.386992  | 0.615652  |
| 57 | 1 | 0 | -3.667066 | 1.351989  | -2.621678 |
| 58 | 1 | 0 | -6.015866 | 2.030729  | -2.247247 |
| 59 | 1 | 0 | -6.726194 | 2.948160  | -0.040110 |
| 60 | 1 | 0 | -5.041317 | 3.182594  | 1.783595  |
| 61 | 1 | 0 | -2.693710 | 2.495342  | 1.412466  |
| 62 | 6 | 0 | 1.458570  | 4.016469  | 2.216707  |
| 63 | 6 | 0 | 2.758242  | 4.818869  | 0.214799  |
| 64 | 6 | 0 | 3.607415  | 2.861090  | 1.596159  |
| 65 | 1 | 0 | 1.985353  | 4.708966  | 2.881958  |
| 66 | 1 | 0 | 0.559696  | 4.511038  | 1.836363  |
| 67 | 1 | 0 | 1.148510  | 3.142114  | 2.798463  |
| 68 | 1 | 0 | 3.283477  | 5.547959  | 0.842495  |
| 69 | 1 | 0 | 3.407421  | 4.535043  | -0.614930 |
| 70 | 1 | 0 | 1.859832  | 5.299216  | -0.187060 |
| 71 | 1 | 0 | 4.166153  | 3.522963  | 2.268337  |

|    |   |   |          |          |          |
|----|---|---|----------|----------|----------|
| 72 | 1 | 0 | 3.303630 | 1.977518 | 2.168687 |
| 73 | 1 | 0 | 4.260257 | 2.548796 | 0.780086 |

*syn-cis*-TS2

Standard orientation:

| Center Number | Atomic Number | Atomic Type | Coordinates (Angstroms) |           |           |
|---------------|---------------|-------------|-------------------------|-----------|-----------|
|               |               |             | X                       | Y         | Z         |
| 1             | 6             | 0           | -1.651264               | -3.286721 | 1.279569  |
| 2             | 6             | 0           | -2.449379               | -1.986861 | 0.906671  |
| 3             | 7             | 0           | -0.527963               | -3.223440 | 0.344739  |
| 4             | 6             | 0           | -0.374567               | -1.909627 | -0.005135 |
| 5             | 7             | 0           | -1.416759               | -1.152252 | 0.237706  |
| 6             | 6             | 0           | 0.797633                | -3.831398 | 0.445463  |
| 7             | 6             | 0           | 1.621269                | -2.938079 | -0.531776 |
| 8             | 7             | 0           | 0.858775                | -1.669215 | -0.468974 |
| 9             | 1             | 0           | -2.232143               | -4.201296 | 1.144273  |
| 10            | 1             | 0           | -1.295054               | -3.249932 | 2.320714  |
| 11            | 6             | 0           | -3.730853               | -2.208756 | 0.044662  |
| 12            | 1             | 0           | 0.787420                | -4.877837 | 0.133351  |
| 13            | 1             | 0           | 1.180874                | -3.771394 | 1.475644  |
| 14            | 6             | 0           | 3.136657                | -2.794576 | -0.233722 |
| 15            | 6             | 0           | 3.399242                | -2.094427 | 1.113032  |
| 16            | 6             | 0           | 3.790456                | -1.980828 | -1.371713 |
| 17            | 6             | 0           | 3.751951                | -4.210432 | -0.217360 |
| 18            | 6             | 0           | -4.326448               | -0.833799 | -0.317128 |
| 19            | 6             | 0           | -4.761853               | -2.985055 | 0.891718  |
| 20            | 6             | 0           | -3.425705               | -2.984890 | -1.250784 |
| 21            | 1             | 0           | 4.477434                | -1.975153 | 1.262848  |
| 22            | 1             | 0           | 2.945004                | -1.100187 | 1.141105  |
| 23            | 1             | 0           | 3.014052                | -2.669161 | 1.962689  |
| 24            | 1             | 0           | 4.875048                | -1.936084 | -1.225981 |
| 25            | 1             | 0           | 3.606443                | -2.446996 | -2.347278 |
| 26            | 1             | 0           | 3.435408                | -0.946512 | -1.414872 |
| 27            | 1             | 0           | 4.837584                | -4.145414 | -0.090987 |
| 28            | 1             | 0           | 3.362481                | -4.820321 | 0.605989  |
| 29            | 1             | 0           | 3.560515                | -4.742728 | -1.157111 |
| 30            | 1             | 0           | -5.264348               | -0.963364 | -0.868408 |
| 31            | 1             | 0           | -4.544914               | -0.240428 | 0.577918  |
| 32            | 1             | 0           | -3.646910               | -0.250684 | -0.944258 |
| 33            | 1             | 0           | -5.699741               | -3.093088 | 0.336443  |
| 34            | 1             | 0           | -4.420331               | -3.993925 | 1.149844  |
| 35            | 1             | 0           | -4.990539               | -2.455892 | 1.824879  |
| 36            | 1             | 0           | -4.342265               | -3.103431 | -1.839265 |
| 37            | 1             | 0           | -2.701070               | -2.448851 | -1.871762 |
| 38            | 1             | 0           | -3.030219               | -3.986658 | -1.051294 |
| 39            | 1             | 0           | -1.391947               | 0.020754  | 0.001833  |
| 40            | 1             | 0           | 1.523690                | -3.359464 | -1.543911 |
| 41            | 1             | 0           | -2.763727               | -1.472969 | 1.822437  |
| 42            | 1             | 0           | 1.101301                | -0.799082 | -0.947878 |
| 43            | 6             | 0           | 2.393822                | 1.816049  | -1.072444 |
| 44            | 8             | 0           | 2.252390                | 2.308036  | 0.189979  |
| 45            | 8             | 0           | 3.474809                | 1.730603  | -1.652331 |
| 46            | 6             | 0           | 1.126146                | 1.392297  | -1.666113 |
| 47            | 6             | 0           | -2.293249               | 2.429979  | -0.277625 |
| 48            | 6             | 0           | -1.203609               | 1.468016  | -0.465620 |
| 49            | 6             | 0           | -0.085760               | 1.524975  | -1.079302 |
| 50            | 1             | 0           | 1.202288                | 1.111609  | -2.714926 |
| 51            | 6             | 0           | 3.356697                | 2.965413  | 0.897597  |
| 52            | 6             | 0           | -2.784331               | 3.213722  | -1.342674 |

|    |   |   |           |          |           |
|----|---|---|-----------|----------|-----------|
| 53 | 6 | 0 | -3.841533 | 4.104541 | -1.151027 |
| 54 | 6 | 0 | -4.432013 | 4.243862 | 0.109968  |
| 55 | 6 | 0 | -3.954641 | 3.475641 | 1.176654  |
| 56 | 6 | 0 | -2.907599 | 2.572272 | 0.982377  |
| 57 | 1 | 0 | -2.326271 | 3.113610 | -2.322505 |
| 58 | 1 | 0 | -4.201855 | 4.697085 | -1.988250 |
| 59 | 1 | 0 | -5.252335 | 4.940458 | 0.258472  |
| 60 | 1 | 0 | -4.401028 | 3.577395 | 2.162698  |
| 61 | 1 | 0 | -2.541731 | 1.977542 | 1.815355  |
| 62 | 6 | 0 | 2.696823  | 3.413003 | 2.206620  |
| 63 | 6 | 0 | 3.844180  | 4.182008 | 0.099005  |
| 64 | 6 | 0 | 4.492715  | 1.973768 | 1.181750  |
| 65 | 1 | 0 | 3.426144  | 3.929501 | 2.839595  |
| 66 | 1 | 0 | 1.863866  | 4.092918 | 2.004490  |
| 67 | 1 | 0 | 2.307546  | 2.549862 | 2.755912  |
| 68 | 1 | 0 | 4.571756  | 4.744483 | 0.694916  |
| 69 | 1 | 0 | 4.316805  | 3.877553 | -0.836148 |
| 70 | 1 | 0 | 3.004035  | 4.846463 | -0.128518 |
| 71 | 1 | 0 | 5.248670  | 2.454645 | 1.813198  |
| 72 | 1 | 0 | 4.109135  | 1.101114 | 1.720928  |
| 73 | 1 | 0 | 4.964256  | 1.640510 | 0.256375  |

-----  
*syn-cis-IM3*

Standard orientation:

| Center<br>Number | Atomic<br>Number | Atomic<br>Type | Coordinates (Angstroms) |           |           |
|------------------|------------------|----------------|-------------------------|-----------|-----------|
|                  |                  |                | X                       | Y         | Z         |
| 1                | 6                | 0              | -4.187183               | -0.789504 | 1.121359  |
| 2                | 6                | 0              | -3.591556               | 0.656104  | 0.928200  |
| 3                | 7                | 0              | -3.331001               | -1.560145 | 0.228257  |
| 4                | 6                | 0              | -2.169838               | -0.810413 | 0.090284  |
| 5                | 7                | 0              | -2.212977               | 0.436955  | 0.411528  |
| 6                | 6                | 0              | -2.975365               | -2.969236 | 0.294931  |
| 7                | 6                | 0              | -1.680314               | -2.988549 | -0.567969 |
| 8                | 7                | 0              | -1.147160               | -1.637119 | -0.307914 |
| 9                | 1                | 0              | -5.241188               | -0.875248 | 0.844428  |
| 10               | 1                | 0              | -4.075352               | -1.125650 | 2.165605  |
| 11               | 6                | 0              | -4.440936               | 1.614114  | 0.033794  |
| 12               | 1                | 0              | -3.755145               | -3.609991 | -0.124900 |
| 13               | 1                | 0              | -2.776735               | -3.289093 | 1.331408  |
| 14               | 6                | 0              | -0.671113               | -4.134144 | -0.286179 |
| 15               | 6                | 0              | -0.106328               | -4.075662 | 1.146401  |
| 16               | 6                | 0              | 0.492886                | -4.020044 | -1.293847 |
| 17               | 6                | 0              | -1.391818               | -5.480154 | -0.509399 |
| 18               | 6                | 0              | -3.690196               | 2.955092  | -0.091380 |
| 19               | 6                | 0              | -5.800011               | 1.876611  | 0.716119  |
| 20               | 6                | 0              | -4.668153               | 1.031432  | -1.374217 |
| 21               | 1                | 0              | 0.652127                | -4.855214 | 1.279356  |
| 22               | 1                | 0              | 0.358784                | -3.106469 | 1.348534  |
| 23               | 1                | 0              | -0.880528               | -4.241414 | 1.903067  |
| 24               | 1                | 0              | 1.188377                | -4.857910 | -1.174111 |
| 25               | 1                | 0              | 0.127919                | -4.036703 | -2.327949 |
| 26               | 1                | 0              | 1.072250                | -3.101830 | -1.152061 |
| 27               | 1                | 0              | -0.687553               | -6.311331 | -0.394819 |
| 28               | 1                | 0              | -2.201576               | -5.633641 | 0.212734  |
| 29               | 1                | 0              | -1.819052               | -5.544119 | -1.517640 |
| 30               | 1                | 0              | -4.274778               | 3.668442  | -0.684347 |
| 31               | 1                | 0              | -3.518021               | 3.403753  | 0.895217  |
| 32               | 1                | 0              | -2.720231               | 2.816890  | -0.575085 |
| 33               | 1                | 0              | -6.377775               | 2.611483  | 0.143813  |

|    |   |   |           |           |           |
|----|---|---|-----------|-----------|-----------|
| 34 | 1 | 0 | -6.411943 | 0.970650  | 0.791423  |
| 35 | 1 | 0 | -5.665467 | 2.276898  | 1.728838  |
| 36 | 1 | 0 | -5.236498 | 1.738457  | -1.989946 |
| 37 | 1 | 0 | -3.713884 | 0.840635  | -1.875061 |
| 38 | 1 | 0 | -5.229342 | 0.091110  | -1.344808 |
| 39 | 1 | 0 | -0.178829 | 1.579707  | 0.013937  |
| 40 | 1 | 0 | -1.984467 | -3.074989 | -1.624376 |
| 41 | 1 | 0 | -3.512256 | 1.144743  | 1.908105  |
| 42 | 1 | 0 | -0.384741 | -1.258365 | -0.853024 |
| 43 | 6 | 0 | 3.275096  | -0.703049 | -1.078410 |
| 44 | 8 | 0 | 3.505747  | -0.377037 | 0.205240  |
| 45 | 8 | 0 | 3.865219  | -1.565425 | -1.709729 |
| 46 | 6 | 0 | 2.193586  | 0.120191  | -1.692146 |
| 47 | 6 | 0 | 1.088288  | 3.360115  | -0.277479 |
| 48 | 6 | 0 | 0.760545  | 1.928579  | -0.431549 |
| 49 | 6 | 0 | 1.487052  | 1.035159  | -1.060195 |
| 50 | 1 | 0 | 2.038987  | -0.081387 | -2.751216 |
| 51 | 6 | 0 | 4.556706  | -1.035734 | 1.009591  |
| 52 | 6 | 0 | 2.236781  | 3.939224  | -0.848920 |
| 53 | 6 | 0 | 2.506923  | 5.295431  | -0.677525 |
| 54 | 6 | 0 | 1.637655  | 6.101316  | 0.068701  |
| 55 | 6 | 0 | 0.495406  | 5.536250  | 0.641353  |
| 56 | 6 | 0 | 0.222623  | 4.177116  | 0.469612  |
| 57 | 1 | 0 | 2.914974  | 3.320659  | -1.430285 |
| 58 | 1 | 0 | 3.397034  | 5.727262  | -1.126914 |
| 59 | 1 | 0 | 1.850416  | 7.158411  | 0.200143  |
| 60 | 1 | 0 | -0.185788 | 6.152509  | 1.221638  |
| 61 | 1 | 0 | -0.666618 | 3.739382  | 0.913797  |
| 62 | 6 | 0 | 4.426003  | -0.332329 | 2.363314  |
| 63 | 6 | 0 | 5.932101  | -0.768988 | 0.387106  |
| 64 | 6 | 0 | 4.258224  | -2.533200 | 1.143311  |
| 65 | 1 | 0 | 5.164251  | -0.733595 | 3.065020  |
| 66 | 1 | 0 | 4.594096  | 0.743560  | 2.257714  |
| 67 | 1 | 0 | 3.427069  | -0.484255 | 2.783111  |
| 68 | 1 | 0 | 6.712026  | -1.146433 | 1.057329  |
| 69 | 1 | 0 | 6.034852  | -1.262835 | -0.580376 |
| 70 | 1 | 0 | 6.089036  | 0.306777  | 0.256834  |
| 71 | 1 | 0 | 4.964377  | -2.979964 | 1.851697  |
| 72 | 1 | 0 | 3.246261  | -2.687263 | 1.531817  |
| 73 | 1 | 0 | 4.352775  | -3.046141 | 0.185007  |

---

*S7 Energies of anti-cis- and syn-cis-TS2 with different R<sub>1</sub> group.*

| Species                           | B3LYP/6-31+G(d,p) |              |          |                                 |                            |
|-----------------------------------|-------------------|--------------|----------|---------------------------------|----------------------------|
|                                   | ZPE               | $E_{ZPE}$    | $G_c^a$  | SCF <sub>PCM</sub> <sup>b</sup> | SCF <sub>PCM</sub> + $G_c$ |
| R <sub>1</sub> = Me               |                   |              |          |                                 |                            |
| <i>anti-cis</i> -Me-TS2           | 0.463770          | -1131.950113 | 0.403348 | -1132.437969                    | -1132.034621               |
| <i>syn-cis</i> -Me-TS2            | 0.463832          | -1131.948529 | 0.403800 | -1132.436664                    | -1132.032864               |
| R <sub>1</sub> = Et               |                   |              |          |                                 |                            |
| <i>anti-cis</i> -Et-TS2           | 0.520689          | -1210.525501 | 0.455822 | -1211.071314                    | -1210.615492               |
| <i>syn-cis</i> -Et-TS2            | 0.520589          | -1210.524109 | 0.456277 | -1211.070065                    | -1210.613788               |
| R <sub>1</sub> = <i>i</i> Pr      |                   |              |          |                                 |                            |
| <i>anti-cis</i> - <i>i</i> Pr-TS2 | 0.576711          | -1289.100774 | 0.508546 | -1289.703402                    | -1289.194856               |
| <i>syn-cis</i> - <i>i</i> Pr-TS2  | 0.576900          | -1289.098092 | 0.510560 | -1289.701312                    | -1289.190752               |

a: Thermal correction to Gibbs Free Energy.

b: Total electronic energies in solvent.

*S8: Cartesian coordinates and energies of anti-cis- and syn-cis-TS2  
with different R<sub>1</sub> group.*

*anti-cis- Me-TS2*

Standard orientation:

| Center<br>Number | Atomic<br>Number | Atomic<br>Type | Coordinates (Angstroms) |           |           |
|------------------|------------------|----------------|-------------------------|-----------|-----------|
|                  |                  |                | X                       | Y         | Z         |
| 1                | 6                | 0              | -0.563307               | 3.913485  | -1.113363 |
| 2                | 6                | 0              | 0.624103                | 2.932486  | -1.324250 |
| 3                | 7                | 0              | -1.183636               | 3.357532  | 0.089584  |
| 4                | 6                | 0              | -0.902380               | 2.009982  | 0.116085  |
| 5                | 7                | 0              | 0.098706                | 1.694537  | -0.711894 |
| 6                | 6                | 0              | -2.560775               | 3.509000  | 0.563923  |
| 7                | 6                | 0              | -2.723281               | 2.224076  | 1.444093  |
| 8                | 7                | 0              | -1.710806               | 1.305510  | 0.873796  |
| 9                | 1                | 0              | -1.257724               | 3.877178  | -1.969752 |
| 10               | 1                | 0              | -0.233467               | 4.944827  | -0.966652 |
| 11               | 6                | 0              | 1.039314                | 2.734225  | -2.777298 |
| 12               | 1                | 0              | -3.267513               | 3.513108  | -0.281164 |
| 13               | 1                | 0              | -2.692756               | 4.429073  | 1.139881  |
| 14               | 6                | 0              | -2.487956               | 2.470632  | 2.937373  |
| 15               | 1                | 0              | 0.671282                | 0.833036  | -0.638497 |
| 16               | 1                | 0              | 1.488258                | 3.284908  | -0.741763 |
| 17               | 1                | 0              | -3.717631               | 1.787912  | 1.301140  |
| 18               | 6                | 0              | 2.188749                | -1.070079 | 0.436156  |
| 19               | 8                | 0              | 3.430421                | -1.443501 | 0.844981  |
| 20               | 8                | 0              | 2.007937                | -0.326768 | -0.545144 |
| 21               | 6                | 0              | 1.165557                | -1.623653 | 1.293047  |
| 22               | 6                | 0              | -2.406408               | -2.163106 | 0.030309  |
| 23               | 6                | 0              | -1.372465               | -1.361680 | 0.686557  |
| 24               | 6                | 0              | -0.145170               | -1.564279 | 0.970038  |
| 25               | 1                | 0              | 1.494147                | -2.124927 | 2.199094  |
| 26               | 6                | 0              | 4.657758                | -1.013639 | 0.166453  |
| 27               | 6                | 0              | 5.753981                | -1.688434 | 0.998908  |
| 28               | 6                | 0              | 4.804789                | 0.512786  | 0.231265  |
| 29               | 6                | 0              | 4.680161                | -1.539081 | -1.275070 |
| 30               | 6                | 0              | -2.508352               | -3.554645 | 0.242800  |
| 31               | 6                | 0              | -3.517630               | -4.302315 | -0.364061 |
| 32               | 6                | 0              | -4.449926               | -3.685145 | -1.206115 |
| 33               | 6                | 0              | -4.362879               | -2.307224 | -1.427226 |
| 34               | 6                | 0              | -3.361699               | -1.555270 | -0.809124 |
| 35               | 1                | 0              | 6.740414                | -1.451730 | 0.586675  |
| 36               | 1                | 0              | 5.717546                | -1.342911 | 2.036770  |
| 37               | 1                | 0              | 5.625440                | -2.775078 | 0.993834  |
| 38               | 1                | 0              | 5.792232                | 0.800712  | -0.146598 |
| 39               | 1                | 0              | 4.040530                | 1.009172  | -0.368115 |
| 40               | 1                | 0              | 4.723478                | 0.858018  | 1.267497  |
| 41               | 1                | 0              | 5.652278                | -1.319413 | -1.730761 |
| 42               | 1                | 0              | 4.537902                | -2.624731 | -1.283949 |
| 43               | 1                | 0              | 3.894990                | -1.078051 | -1.875762 |
| 44               | 1                | 0              | -1.786960               | -4.039173 | 0.894365  |
| 45               | 1                | 0              | -3.574429               | -5.372798 | -0.183049 |
| 46               | 1                | 0              | -5.233471               | -4.269501 | -1.680280 |
| 47               | 1                | 0              | -5.079590               | -1.815027 | -2.079956 |
| 48               | 1                | 0              | -3.304434               | -0.484261 | -0.983657 |
| 49               | 1                | 0              | -1.633610               | 0.111049  | 0.916912  |
| 50               | 1                | 0              | 1.410824                | 3.674742  | -3.199182 |
| 51               | 1                | 0              | 0.194056                | 2.386722  | -3.379906 |

|    |   |   |           |          |           |
|----|---|---|-----------|----------|-----------|
| 52 | 1 | 0 | 1.838992  | 1.991160 | -2.847664 |
| 53 | 1 | 0 | -3.268846 | 3.120584 | 3.348675  |
| 54 | 1 | 0 | -1.514296 | 2.942676 | 3.106117  |
| 55 | 1 | 0 | -2.507460 | 1.523096 | 3.483648  |

-----  
*syn-cis*-Me-TS2

Standard orientation:

| Center<br>Number | Atomic<br>Number | Atomic<br>Type | Coordinates (Angstroms) |           |           |
|------------------|------------------|----------------|-------------------------|-----------|-----------|
|                  |                  |                | X                       | Y         | Z         |
| 1                | 6                | 0              | 2.226763                | -1.100498 | -0.402591 |
| 2                | 8                | 0              | 3.460667                | -1.549824 | -0.752174 |
| 3                | 8                | 0              | 2.042168                | -0.321007 | 0.547462  |
| 4                | 6                | 0              | 1.209866                | -1.630030 | -1.286788 |
| 5                | 6                | 0              | -2.378178               | -2.106436 | -0.067287 |
| 6                | 6                | 0              | -1.329088               | -1.319462 | -0.718130 |
| 7                | 6                | 0              | -0.102595               | -1.540803 | -0.990285 |
| 8                | 1                | 0              | 1.547073                | -2.147351 | -2.180279 |
| 9                | 6                | 0              | 4.683863                | -1.182398 | -0.030119 |
| 10               | 6                | 0              | 4.935854                | 0.327097  | -0.135338 |
| 11               | 6                | 0              | 5.766002                | -1.957710 | -0.790144 |
| 12               | 6                | 0              | 4.605899                | -1.658847 | 1.426257  |
| 13               | 6                | 0              | -3.055036               | -1.612038 | 1.066012  |
| 14               | 6                | 0              | -4.073633               | -2.348541 | 1.674249  |
| 15               | 6                | 0              | -4.458126               | -3.588983 | 1.155362  |
| 16               | 6                | 0              | -3.803800               | -4.086609 | 0.023148  |
| 17               | 6                | 0              | -2.777158               | -3.358399 | -0.580132 |
| 18               | 1                | 0              | 5.920157                | 0.564160  | 0.283847  |
| 19               | 1                | 0              | 4.927502                | 0.641485  | -1.184422 |
| 20               | 1                | 0              | 4.177455                | 0.891514  | 0.408021  |
| 21               | 1                | 0              | 6.748070                | -1.772030 | -0.342877 |
| 22               | 1                | 0              | 5.564318                | -3.032553 | -0.754437 |
| 23               | 1                | 0              | 5.796489                | -1.648585 | -1.839578 |
| 24               | 1                | 0              | 5.571356                | -1.494800 | 1.918171  |
| 25               | 1                | 0              | 3.832151                | -1.122453 | 1.977148  |
| 26               | 1                | 0              | 4.383758                | -2.730416 | 1.462229  |
| 27               | 1                | 0              | -2.761742               | -0.651211 | 1.479802  |
| 28               | 1                | 0              | -4.568950               | -1.951182 | 2.556733  |
| 29               | 1                | 0              | -5.254419               | -4.159011 | 1.625548  |
| 30               | 1                | 0              | -4.090005               | -5.050558 | -0.390158 |
| 31               | 1                | 0              | -2.271586               | -3.751150 | -1.457488 |
| 32               | 6                | 0              | -2.383742               | 3.612170  | -0.956010 |
| 33               | 6                | 0              | -2.850753               | 2.171345  | -1.345414 |
| 34               | 7                | 0              | -1.417767               | 3.320059  | 0.104262  |
| 35               | 6                | 0              | -0.941018               | 2.049597  | -0.141504 |
| 36               | 7                | 0              | -1.689771               | 1.335042  | -0.951402 |
| 37               | 6                | 0              | -0.291461               | 4.134001  | 0.558728  |
| 38               | 6                | 0              | 0.621068                | 3.055472  | 1.209628  |
| 39               | 7                | 0              | 0.236767                | 1.846917  | 0.453283  |
| 40               | 1                | 0              | -3.205739               | 4.237084  | -0.596084 |
| 41               | 1                | 0              | -1.893185               | 4.118476  | -1.802619 |
| 42               | 6                | 0              | -4.141916               | 1.738881  | -0.643424 |
| 43               | 1                | 0              | -0.600535               | 4.902755  | 1.271094  |
| 44               | 1                | 0              | 0.218443                | 4.617585  | -0.292037 |
| 45               | 6                | 0              | 2.113230                | 3.354194  | 1.132397  |
| 46               | 1                | 0              | 0.759515                | 0.955057  | 0.485858  |
| 47               | 1                | 0              | 0.329762                | 2.929449  | 2.262868  |
| 48               | 1                | 0              | -2.985699               | 2.097116  | -2.429395 |
| 49               | 1                | 0              | -1.592941               | 0.121313  | -0.965561 |
| 50               | 1                | 0              | -4.988149               | 2.338299  | -0.998198 |



|    |   |   |           |          |           |
|----|---|---|-----------|----------|-----------|
| 51 | 1 | 0 | -4.058685 | 1.862507 | 0.441556  |
| 52 | 1 | 0 | -4.356606 | 0.686511 | -0.849173 |
| 53 | 1 | 0 | 2.344810  | 4.267223 | 1.691937  |
| 54 | 1 | 0 | 2.432485  | 3.487286 | 0.093785  |
| 55 | 1 | 0 | 2.691391  | 2.533979 | 1.566714  |

*anti-cis*-Et-TS2

Standard orientation:

| Center<br>Number | Atomic<br>Number | Atomic<br>Type | Coordinates (Angstroms) |           |           |
|------------------|------------------|----------------|-------------------------|-----------|-----------|
|                  |                  |                | X                       | Y         | Z         |
| 1                | 6                | 0              | 0.641485                | -3.616025 | -1.066219 |
| 2                | 6                | 0              | -0.638992               | -2.737471 | -1.175346 |
| 3                | 7                | 0              | 1.335937                | -2.974622 | 0.050367  |
| 4                | 6                | 0              | 0.945370                | -1.655753 | 0.083240  |
| 5                | 7                | 0              | -0.162435               | -1.448204 | -0.635065 |
| 6                | 6                | 0              | 2.763545                | -2.999891 | 0.376585  |
| 7                | 6                | 0              | 2.912435                | -1.677688 | 1.204372  |
| 8                | 7                | 0              | 1.765706                | -0.865735 | 0.736133  |
| 9                | 1                | 0              | 1.238030                | -3.553066 | -1.992457 |
| 10               | 1                | 0              | 0.418172                | -4.664973 | -0.859149 |
| 11               | 6                | 0              | -1.213602               | -2.597275 | -2.585839 |
| 12               | 1                | 0              | 3.374892                | -2.975353 | -0.539402 |
| 13               | 1                | 0              | 3.029650                | -3.890284 | 0.952004  |
| 14               | 1                | 0              | -0.790858               | -0.631874 | -0.522498 |
| 15               | 1                | 0              | -1.414162               | -3.147141 | -0.509250 |
| 16               | 1                | 0              | 3.843858                | -1.164519 | 0.937715  |
| 17               | 1                | 0              | 1.603820                | 0.326942  | 0.741362  |
| 18               | 6                | 0              | -2.317298               | 1.223934  | 0.636037  |
| 19               | 8                | 0              | -3.531990               | 1.533377  | 1.162456  |
| 20               | 8                | 0              | -2.188019               | 0.445822  | -0.325834 |
| 21               | 6                | 0              | -1.251417               | 1.888068  | 1.351386  |
| 22               | 6                | 0              | 2.125746                | 2.583840  | -0.314835 |
| 23               | 6                | 0              | 1.219331                | 1.757674  | 0.483409  |
| 24               | 6                | 0              | 0.018324                | 1.898031  | 0.890585  |
| 25               | 1                | 0              | -1.516809               | 2.410752  | 2.265973  |
| 26               | 6                | 0              | -4.790047               | 0.979990  | 0.649712  |
| 27               | 6                | 0              | -5.836174               | 1.622979  | 1.567402  |
| 28               | 6                | 0              | -4.811154               | -0.546515 | 0.807061  |
| 29               | 6                | 0              | -5.010886               | 1.417174  | -0.804291 |
| 30               | 6                | 0              | 2.188588                | 3.984045  | -0.150320 |
| 31               | 6                | 0              | 3.082678                | 4.755272  | -0.893527 |
| 32               | 6                | 0              | 3.934277                | 4.153407  | -1.826966 |
| 33               | 6                | 0              | 3.883953                | 2.767043  | -2.002299 |
| 34               | 6                | 0              | 2.999586                | 1.992166  | -1.249239 |
| 35               | 1                | 0              | -6.841028               | 1.293032  | 1.283924  |
| 36               | 1                | 0              | -5.658167               | 1.342371  | 2.610222  |
| 37               | 1                | 0              | -5.793318               | 2.713826  | 1.493173  |
| 38               | 1                | 0              | -5.810052               | -0.925287 | 0.562843  |
| 39               | 1                | 0              | -4.083984               | -1.021682 | 0.147448  |
| 40               | 1                | 0              | -4.586046               | -0.824402 | 1.842289  |
| 41               | 1                | 0              | -6.008549               | 1.105412  | -1.133804 |
| 42               | 1                | 0              | -4.951417               | 2.507586  | -0.884628 |
| 43               | 1                | 0              | -4.265170               | 0.976063  | -1.467032 |
| 44               | 1                | 0              | 1.529707                | 4.456727  | 0.572301  |
| 45               | 1                | 0              | 3.111850                | 5.832116  | -0.746957 |
| 46               | 1                | 0              | 4.627888                | 4.756000  | -2.406637 |
| 47               | 1                | 0              | 4.538633                | 2.286341  | -2.725007 |
| 48               | 1                | 0              | 2.970532                | 0.914987  | -1.389309 |
| 49               | 6                | 0              | -1.767689               | -3.915653 | -3.140487 |

|    |   |   |           |           |           |
|----|---|---|-----------|-----------|-----------|
| 50 | 6 | 0 | 2.875354  | -1.880750 | 2.728319  |
| 51 | 6 | 0 | 4.152212  | -2.514966 | 3.293168  |
| 52 | 1 | 0 | -2.008985 | -1.843624 | -2.555213 |
| 53 | 1 | 0 | -0.432638 | -2.200425 | -3.246454 |
| 54 | 1 | 0 | -2.200613 | -3.765402 | -4.134201 |
| 55 | 1 | 0 | -0.987090 | -4.679595 | -3.235365 |
| 56 | 1 | 0 | -2.555107 | -4.320727 | -2.493997 |
| 57 | 1 | 0 | 2.718666  | -0.897948 | 3.187431  |
| 58 | 1 | 0 | 1.997650  | -2.487844 | 2.985191  |
| 59 | 1 | 0 | 4.084837  | -2.620434 | 4.380586  |
| 60 | 1 | 0 | 4.336275  | -3.513736 | 2.880243  |
| 61 | 1 | 0 | 5.031399  | -1.897314 | 3.074191  |

*syn-cis*-Et-TS2

Standard orientation:

| Center Number | Atomic Number | Atomic Type | Coordinates (Angstroms) |           |           |
|---------------|---------------|-------------|-------------------------|-----------|-----------|
|               |               |             | X                       | Y         | Z         |
| 1             | 6             | 0           | 2.322980                | -1.407390 | -0.477185 |
| 2             | 8             | 0           | 3.536916                | -1.873829 | -0.872114 |
| 3             | 8             | 0           | 2.189835                | -0.575997 | 0.436413  |
| 4             | 6             | 0           | 1.260231                | -1.987236 | -1.271643 |
| 5             | 6             | 0           | -2.264282               | -2.381783 | 0.145217  |
| 6             | 6             | 0           | -1.246232               | -1.633492 | -0.594726 |
| 7             | 6             | 0           | -0.034891               | -1.876488 | -0.913864 |
| 8             | 1             | 0           | 1.549758                | -2.552927 | -2.152483 |
| 9             | 6             | 0           | 4.800382                | -1.437845 | -0.267533 |
| 10            | 6             | 0           | 5.018684                | 0.060488  | -0.515407 |
| 11            | 6             | 0           | 5.840372                | -2.262066 | -1.034942 |
| 12            | 6             | 0           | 4.833149                | -1.791713 | 1.225099  |
| 13            | 6             | 0           | -2.907829               | -1.815794 | 1.264424  |
| 14            | 6             | 0           | -3.899328               | -2.516093 | 1.954779  |
| 15            | 6             | 0           | -4.289377               | -3.791619 | 1.534568  |
| 16            | 6             | 0           | -3.667462               | -4.361488 | 0.418210  |
| 17            | 6             | 0           | -2.667878               | -3.669042 | -0.266867 |
| 18            | 1             | 0           | 6.020725                | 0.347351  | -0.177126 |
| 19            | 1             | 0           | 4.943789                | 0.283309  | -1.585095 |
| 20            | 1             | 0           | 4.282063                | 0.659144  | 0.021510  |
| 21            | 1             | 0           | 6.847660                | -2.027628 | -0.675240 |
| 22            | 1             | 0           | 5.660768                | -3.332383 | -0.895414 |
| 23            | 1             | 0           | 5.792223                | -2.042533 | -2.106048 |
| 24            | 1             | 0           | 5.830743                | -1.582704 | 1.627443  |
| 25            | 1             | 0           | 4.096400                | -1.215269 | 1.785877  |
| 26            | 1             | 0           | 4.625838                | -2.857584 | 1.365684  |
| 27            | 1             | 0           | -2.610695               | -0.826692 | 1.601753  |
| 28            | 1             | 0           | -4.369299               | -2.062745 | 2.824060  |
| 29            | 1             | 0           | -5.064988               | -4.333337 | 2.068507  |
| 30            | 1             | 0           | -3.957991               | -5.353542 | 0.081542  |
| 31            | 1             | 0           | -2.187808               | -4.117267 | -1.131888 |
| 32            | 6             | 0           | -2.303246               | 3.282281  | -1.034787 |
| 33            | 6             | 0           | -2.780231               | 1.826717  | -1.355232 |
| 34            | 7             | 0           | -1.307639               | 3.032600  | 0.008782  |
| 35            | 6             | 0           | -0.839895               | 1.752653  | -0.195494 |
| 36            | 7             | 0           | -1.611679               | 1.005553  | -0.952602 |
| 37            | 6             | 0           | -0.171051               | 3.865531  | 0.397603  |
| 38            | 6             | 0           | 0.768574                | 2.813872  | 1.058669  |
| 39            | 7             | 0           | 0.352216                | 1.572488  | 0.376707  |
| 40            | 1             | 0           | -3.111621               | 3.925060  | -0.676662 |
| 41            | 1             | 0           | -1.837113               | 3.754834  | -1.913959 |
| 42            | 6             | 0           | -4.062749               | 1.410580  | -0.615294 |

|    |   |   |           |           |           |
|----|---|---|-----------|-----------|-----------|
| 43 | 1 | 0 | -0.464735 | 4.659526  | 1.087757  |
| 44 | 1 | 0 | 0.310039  | 4.319428  | -0.486177 |
| 45 | 6 | 0 | 2.263646  | 3.096671  | 0.907527  |
| 46 | 1 | 0 | 0.884566  | 0.687242  | 0.411491  |
| 47 | 1 | 0 | 0.524953  | 2.738589  | 2.129623  |
| 48 | 1 | 0 | -2.939340 | 1.709554  | -2.433325 |
| 49 | 1 | 0 | -1.517713 | -0.211099 | -0.908126 |
| 50 | 6 | 0 | 2.709898  | 4.356013  | 1.661018  |
| 51 | 6 | 0 | -5.328543 | 2.071341  | -1.174842 |
| 52 | 1 | 0 | -4.156040 | 0.321513  | -0.687618 |
| 53 | 1 | 0 | -3.950609 | 1.641505  | 0.452008  |
| 54 | 1 | 0 | 2.814966  | 2.226190  | 1.280139  |
| 55 | 1 | 0 | 2.501250  | 3.184361  | -0.160087 |
| 56 | 1 | 0 | 3.790170  | 4.501411  | 1.564568  |
| 57 | 1 | 0 | 2.222186  | 5.258546  | 1.274585  |
| 58 | 1 | 0 | 2.479609  | 4.282967  | 2.730472  |
| 59 | 1 | 0 | -6.215192 | 1.732550  | -0.629796 |
| 60 | 1 | 0 | -5.295186 | 3.164477  | -1.096559 |
| 61 | 1 | 0 | -5.473191 | 1.817693  | -2.231809 |

-----  
*anti-cis-iPr-TS2*

Standard orientation:

| Center<br>Number | Atomic<br>Number | Atomic<br>Type | Coordinates (Angstroms) |           |           |
|------------------|------------------|----------------|-------------------------|-----------|-----------|
|                  |                  |                | X                       | Y         | Z         |
| 1                | 6                | 0              | -0.908329               | -3.319652 | 1.227368  |
| 2                | 6                | 0              | 0.469068                | -2.589686 | 1.246290  |
| 3                | 7                | 0              | -1.558186               | -2.673254 | 0.086826  |
| 4                | 6                | 0              | -1.011545               | -1.422752 | -0.063692 |
| 5                | 7                | 0              | 0.136826                | -1.300726 | 0.607241  |
| 6                | 6                | 0              | -2.985085               | -2.561975 | -0.217658 |
| 7                | 6                | 0              | -3.025615               | -1.256767 | -1.091156 |
| 8                | 7                | 0              | -1.745452               | -0.587715 | -0.764455 |
| 9                | 1                | 0              | -1.476360               | -3.143348 | 2.154214  |
| 10               | 1                | 0              | -0.803597               | -4.396745 | 1.078496  |
| 11               | 6                | 0              | 1.148844                | -2.420479 | 2.620404  |
| 12               | 1                | 0              | -3.574895               | -2.445905 | 0.704828  |
| 13               | 1                | 0              | -3.350495               | -3.443072 | -0.751683 |
| 14               | 1                | 0              | 0.845174                | -0.564382 | 0.437469  |
| 15               | 1                | 0              | 1.163152                | -3.143370 | 0.595707  |
| 16               | 1                | 0              | -3.847748               | -0.614325 | -0.753645 |
| 17               | 1                | 0              | -1.486044               | 0.589000  | -0.767934 |
| 18               | 6                | 0              | 2.492408                | 1.136319  | -0.790624 |
| 19               | 8                | 0              | 3.709422                | 1.330488  | -1.363867 |
| 20               | 8                | 0              | 2.328349                | 0.378600  | 0.182009  |
| 21               | 6                | 0              | 1.464895                | 1.891490  | -1.471778 |
| 22               | 6                | 0              | -1.769247               | 2.894309  | 0.306835  |
| 23               | 6                | 0              | -0.976932               | 1.981621  | -0.519454 |
| 24               | 6                | 0              | 0.218431                | 2.014772  | -0.966605 |
| 25               | 1                | 0              | 1.742378                | 2.384315  | -2.399348 |
| 26               | 6                | 0              | 4.928752                | 0.660551  | -0.897912 |
| 27               | 6                | 0              | 5.994081                | 1.199743  | -1.859300 |
| 28               | 6                | 0              | 4.797036                | -0.861116 | -1.048021 |
| 29               | 6                | 0              | 5.247450                | 1.077137  | 0.543996  |
| 30               | 6                | 0              | -1.630232               | 4.295061  | 0.204464  |
| 31               | 6                | 0              | -2.413240               | 5.153604  | 0.976170  |
| 32               | 6                | 0              | -3.352808               | 4.640076  | 1.877735  |
| 33               | 6                | 0              | -3.503261               | 3.254753  | 1.991767  |
| 34               | 6                | 0              | -2.729414               | 2.394888  | 1.209581  |
| 35               | 1                | 0              | 6.974064                | 0.778737  | -1.611750 |

|    |   |   |           |           |           |
|----|---|---|-----------|-----------|-----------|
| 36 | 1 | 0 | 5.750948  | 0.933318  | -2.892606 |
| 37 | 1 | 0 | 6.055752  | 2.290083  | -1.791196 |
| 38 | 1 | 0 | 5.763495  | -1.334104 | -0.840731 |
| 39 | 1 | 0 | 4.053657  | -1.263219 | -0.358559 |
| 40 | 1 | 0 | 4.505686  | -1.117174 | -2.072237 |
| 41 | 1 | 0 | 6.222501  | 0.671060  | 0.835979  |
| 42 | 1 | 0 | 5.296288  | 2.168349  | 0.620654  |
| 43 | 1 | 0 | 4.489037  | 0.711043  | 1.237234  |
| 44 | 1 | 0 | -0.902584 | 4.699413  | -0.493211 |
| 45 | 1 | 0 | -2.287301 | 6.228874  | 0.877000  |
| 46 | 1 | 0 | -3.960098 | 5.310326  | 2.479574  |
| 47 | 1 | 0 | -4.228997 | 2.841930  | 2.688050  |
| 48 | 1 | 0 | -2.856804 | 1.319617  | 1.301658  |
| 49 | 6 | 0 | 1.533537  | -3.793150 | 3.196325  |
| 50 | 6 | 0 | -3.203242 | -1.470573 | -2.613604 |
| 51 | 6 | 0 | -4.627837 | -1.947983 | -2.938221 |
| 52 | 1 | 0 | 2.076579  | -1.868220 | 2.417683  |
| 53 | 1 | 0 | 2.113985  | -3.675319 | 4.116992  |
| 54 | 1 | 0 | 0.645069  | -4.387323 | 3.444255  |
| 55 | 1 | 0 | 2.141029  | -4.372610 | 2.491267  |
| 56 | 1 | 0 | -3.076823 | -0.472357 | -3.055143 |
| 57 | 1 | 0 | -4.780699 | -1.995903 | -4.021434 |
| 58 | 1 | 0 | -4.821846 | -2.951431 | -2.539042 |
| 59 | 1 | 0 | -5.384034 | -1.270062 | -2.525111 |
| 60 | 6 | 0 | -2.140802 | -2.389179 | -3.233604 |
| 61 | 1 | 0 | -1.130151 | -2.030408 | -3.017994 |
| 62 | 1 | 0 | -2.225060 | -3.417721 | -2.862858 |
| 63 | 1 | 0 | -2.258275 | -2.422889 | -4.322082 |
| 64 | 6 | 0 | 0.331362  | -1.592932 | 3.623324  |
| 65 | 1 | 0 | 0.044939  | -0.624219 | 3.204330  |
| 66 | 1 | 0 | -0.580926 | -2.113848 | 3.938233  |
| 67 | 1 | 0 | 0.924887  | -1.407424 | 4.524740  |

-----  
*syn-cis-iPr-TS2*

Standard orientation:

| Center<br>Number | Atomic<br>Number | Atomic<br>Type | Coordinates (Angstroms) |           |           |
|------------------|------------------|----------------|-------------------------|-----------|-----------|
|                  |                  |                | X                       | Y         | Z         |
| 1                | 6                | 0              | -2.326652               | 1.564832  | -0.416494 |
| 2                | 8                | 0              | -3.536565               | 2.071060  | -0.773500 |
| 3                | 8                | 0              | -2.177543               | 0.795900  | 0.547374  |
| 4                | 6                | 0              | -1.285088               | 2.021436  | -1.314783 |
| 5                | 6                | 0              | 2.264965                | 2.571569  | -0.051108 |
| 6                | 6                | 0              | 1.238669                | 1.728807  | -0.669962 |
| 7                | 6                | 0              | 0.019291                | 1.933783  | -0.986495 |
| 8                | 1                | 0              | -1.597893               | 2.502824  | -2.236995 |
| 9                | 6                | 0              | -4.769311               | 1.820122  | -0.018200 |
| 10               | 6                | 0              | -5.129760               | 0.329829  | -0.057934 |
| 11               | 6                | 0              | -5.807767               | 2.640263  | -0.791903 |
| 12               | 6                | 0              | -4.630639               | 2.344993  | 1.416570  |
| 13               | 6                | 0              | 2.921255                | 2.166472  | 1.128515  |
| 14               | 6                | 0              | 3.919351                | 2.955537  | 1.704126  |
| 15               | 6                | 0              | 4.303095                | 4.160367  | 1.106782  |
| 16               | 6                | 0              | 3.668532                | 4.569560  | -0.071196 |
| 17               | 6                | 0              | 2.662608                | 3.788763  | -0.642698 |
| 18               | 1                | 0              | -6.124966               | 0.180777  | 0.375948  |
| 19               | 1                | 0              | -5.152175               | -0.027641 | -1.092801 |
| 20               | 1                | 0              | -4.408663               | -0.262855 | 0.505730  |
| 21               | 1                | 0              | -6.792215               | 2.541735  | -0.322762 |
| 22               | 1                | 0              | -5.530666               | 3.698699  | -0.802062 |

|    |   |   |           |           |           |
|----|---|---|-----------|-----------|-----------|
| 23 | 1 | 0 | -5.878708 | 2.293799  | -1.827686 |
| 24 | 1 | 0 | -5.595479 | 2.264689  | 1.929810  |
| 25 | 1 | 0 | -3.884808 | 1.777670  | 1.975094  |
| 26 | 1 | 0 | -4.336442 | 3.399571  | 1.407109  |
| 27 | 1 | 0 | 2.626587  | 1.235451  | 1.603927  |
| 28 | 1 | 0 | 4.398403  | 2.627657  | 2.623385  |
| 29 | 1 | 0 | 5.083380  | 4.771079  | 1.552099  |
| 30 | 1 | 0 | 3.954085  | 5.505206  | -0.545520 |
| 31 | 1 | 0 | 2.172666  | 4.112782  | -1.556275 |
| 32 | 6 | 0 | 2.238019  | -3.233133 | -0.912627 |
| 33 | 6 | 0 | 2.790243  | -1.783404 | -1.140304 |
| 34 | 7 | 0 | 1.158892  | -2.991307 | 0.044730  |
| 35 | 6 | 0 | 0.773874  | -1.679135 | -0.108949 |
| 36 | 7 | 0 | 1.650772  | -0.927754 | -0.732646 |
| 37 | 6 | 0 | -0.036880 | -3.794464 | 0.289386  |
| 38 | 6 | 0 | -0.998771 | -2.735475 | 0.910498  |
| 39 | 7 | 0 | -0.459677 | -1.475173 | 0.361136  |
| 40 | 1 | 0 | 2.987911  | -3.919178 | -0.510264 |
| 41 | 1 | 0 | 1.841948  | -3.658685 | -1.847994 |
| 42 | 6 | 0 | 4.099332  | -1.437526 | -0.389566 |
| 43 | 1 | 0 | 0.162444  | -4.620411 | 0.976083  |
| 44 | 1 | 0 | -0.433636 | -4.205665 | -0.651988 |
| 45 | 6 | 0 | -2.503095 | -2.927539 | 0.630189  |
| 46 | 1 | 0 | -0.934409 | -0.562599 | 0.446671  |
| 47 | 1 | 0 | -0.859422 | -2.736978 | 2.001825  |
| 48 | 1 | 0 | 2.974114  | -1.623852 | -2.208938 |
| 49 | 1 | 0 | 1.531108  | 0.284691  | -0.803675 |
| 50 | 6 | 0 | -3.011124 | -4.207014 | 1.315144  |
| 51 | 6 | 0 | 5.301770  | -2.138744 | -1.042430 |
| 52 | 1 | 0 | 4.230951  | -0.355312 | -0.523240 |
| 53 | 1 | 0 | -2.999036 | -2.072173 | 1.107773  |
| 54 | 1 | 0 | -4.098205 | -4.290229 | 1.215708  |
| 55 | 1 | 0 | -2.572931 | -5.106069 | 0.864023  |
| 56 | 1 | 0 | -2.772945 | -4.215639 | 2.385189  |
| 57 | 1 | 0 | 6.236834  | -1.816237 | -0.572767 |
| 58 | 1 | 0 | 5.244360  | -3.229582 | -0.935940 |
| 59 | 1 | 0 | 5.370287  | -1.908650 | -2.112108 |
| 60 | 6 | 0 | -2.870174 | -2.899839 | -0.860776 |
| 61 | 1 | 0 | -2.494419 | -1.997552 | -1.351399 |
| 62 | 1 | 0 | -2.475705 | -3.770976 | -1.397105 |
| 63 | 1 | 0 | -3.958877 | -2.915338 | -0.976157 |
| 64 | 6 | 0 | 4.041965  | -1.714776 | 1.119739  |
| 65 | 1 | 0 | 3.187788  | -1.217868 | 1.588537  |
| 66 | 1 | 0 | 3.969054  | -2.787531 | 1.334319  |
| 67 | 1 | 0 | 4.950385  | -1.343367 | 1.605769  |

---

*S9: Reference 14 details.*

14 M. J. Frisch, G. W. Trucks, H. B. Schlegel, G. E. Scuseria, M. A. Robb, J. R. Cheeseman, J. A. Jr. Montgomery, T. Vreven, K. N. Kudin, J. C. Burant, J. M. Millam, S. S. Iyengar, J. Tomasi, V. Barone, B. Mennucci, M. Cossi, G. Scalmani, N. Rega, G. A. Petersson, H. Nakatsuji, M. Hada, M. Ehara, K. Toyota, R. Fukuda, J. Hasegawa, M. Ishida, T. Nakajima, Y. Honda, O. Kitao, H. Nakai, M. Klene, X. Li, J. E. Knox, H. P. Hratchian, J. B. Cross, V. Bakken, C. Adamo, J. Jaramillo, R. Gomperts, R. E. Stratmann, O. Yazyev, A. J. Austin, R. Cammi, C. Pomelli, J. W. Ochterski, P. Y. Ayala, K. Morokuma, G. A. Voth, P. Salvador, J. J. Dannenberg, V. G. Zakrzewski, S. Dapprich, A. D. Daniels, M. C. Strain, O. Farkas, D. K. Malick, A. D. Rabuck, K. Raghavachari, J. B. Foresman, J. V. Ortiz, Q. Cui, A. G. Baboul, S. Clifford, J. Cioslowski, B. B. Stefanov, G. Liu, A. Liashenko, P. Piskorz, I. Komaromi, R. L. Martin, D. J. Fox, T. Keith, M. A. Al-Laham, C. Y. Peng, A. Nanayakkara, M. Challacombe, P. M. W. Gill, B. Johnson, W. Chen, M. W. Wong, C. Gonzalez and J. A. Pople, Gaussian 03, B05; 105 Gaussian, Inc.: Wallingford, CT, 2003.
